# Supplementary material for: Gut microbiota-mediated tributyltin-induced metabolic disorder in rats
Source: Royal Society of Chemistry journal article supplement (doi:10.1039/d0ra07502g), 2020-01-01
Supplement: d0ra07502g1.xlsx [file d0ra07502g1.xlsx]

## Sheet: Figure 1A
Figure 1A. Effect of animal weight gain.
Days	Control												TBT
0	0	0	0	0	0	0	0	0	0	0	0	0	0	0	0	0	0	0	0	0	0	0	0	0
6	1.6	7.8	4.7	19.4	7.7	19.9	12.3	13	12.5	4.5	19.7	20.3	14.5	17.9	15.3	7.3	9.2	16.2	5.6	9.7	10.7	-1.9	6.4	5.2
12	10.5	24.6	17.4	25.1	20.8	33.8	19.3	23.4	21.5	10.1	33.7	28.3	18.1	32.1	18.7	-3.7	5.8	21.7	19.9	12.7	18.6	11.8	11	21.8
18	14.7	33.7	37	31.4	42.4	39.9	27.5	35.1	38.9	26.8	38.1	41.4	16	26.5	29.9	-0.7	36.9	40.1	35.6	16.5	27.1	24.4	24.9	23.8
24	28.7	40.9	48.6	43.3	61.9	47.9	28.7	42.8	34.6	36	48.6	47.8	21.6	37.3	40.9	1.9	55.1	63	36.9	14.8	32.3	24.4	26.8	42
30	28.8	51.6	50.9	53	48.4	62.2	41.5	58.9	31.2	42.4	49.9	62.5	29.8	37.9	41	4.7	54.4	73.7	36.4	25.2	37.2	38.1	30	53.1
36	36.7	59.8	59.1	67.2	51.8	70	54.9	62.1	36.7	49.5	55.3	77.7	33.2	49.6	44.9	8.5	39.4	70.5	53.3	31.1	43.1	40.2	33.9	53.3
38	36.8	66.4	55	65.6	59.1	64.4	52.5	69.7	44.2	58.2	63.5	71	37.8	48	49.2	8.5	42.1	64.2	55	37.8	48.1	49.7	35.9	62.4
unit:g

## Sheet: Figure 1B
Figure 1B. The level of TG in serum.
Control	TBT
0.5	0.67
0.3	0.69
0.23	0.65
0.51	0.25
0.3	0.24
0.36	0.4
1	0.5
1.39	0.6
0.94	0.38
1.22	0.2
1	0.3
1.45	0.59
unit:mmol/L

## Sheet: Figure S1
Figure S1A. The food consumption of rats.
Days	Control						TBT
1-6	195.9	210.2	232.7	197.9	229	253.8	219.6	223	209.1	215.4	178.8	212.7
7-12	214.1	209.5	225	205.9	207.9	252.2	232.9	186	199.2	204.9	182.5	216.5
13-18	224.8	212.8	236.3	204.2	236.7	240	188.3	192.1	215.8	206.4	189.1	214
19-24	200.6	207.2	227.5	192.6	205	220.3	178.6	194.5	248	182.8	173.4	209.6
25-30	215.5	214	209.8	218.1	204.5	238.7	200.8	195.8	243.6	197.5	194.1	216.3
31-38	287.4	291.1	271	279.4	286.6	307.6	265	241.3	232.2	283.3	251.8	284.1
unit:g
Figure S1B. The food utilization rate of rats.
Days	Control						TBT
1-6	0.0479837	0.114653	0.118608	0.127842	0.0742358	0.157604	0.147541	0.101345	0.121473	0.0710306	0.049217	0.0545369
7-12	0.120037	0.0878282	0.12	0.084507	0.0702261	0.0872324	0.0764277	-0.0408602	0.0105422	0.0844314	0.118356	0.0979215
13-18	0.0591637	0.121711	0.117224	0.0974535	0.144064	0.0729167	-0.0408922	0.0739198	0.229379	0.0944767	0.111581	0.0742991
19-24	0.105683	0.113417	0.120879	0.0462098	0.0239024	0.0767136	0.0918253	0.0699229	0.165726	-0.00218818	0.0299885	0.0958969
25-30	0.050116	0.0560748	0.00381316	0.132508	0.0146699	0.0670297	0.0438247	0.014811	0.0410509	0.0501266	0.0958269	0.0661119
31-38	0.039666	0.0286843	0.0238007	0.0390122	0.0502442	0.0359233	0.0341509	0.0248653	-0.0469423	0.0550653	0.0446783	0.0267511
Note: The food consumption and food utilization rate were counted per cage.

## Sheet: Figure S2
Figure S2. The caculation of adipose tissue cell area.
	Control		TBT
Sample1	10672.9	Sample1	2847.51
	9662.78		6302.77
	9642.58		6047.1
	7714.14		3823.73
	14013.9		3528.05
	11599.2		7536.96
	9319.08		2166.59
Sample2	8376.77		6386.22
	1440.33		1447.19
	8942.61		8856.5
	9273.36		8211.02
	4736.7		6740.21
	10251.1		9844.92
	634.05	Sample2	2269.85
Sample3	8995.58		3006.78
	8131		6002.9
	6839.28		1869.76
	10399.3		6936.44
	3325.71		5510.97
	3013.26		2546.87
	2166.59		2035.51
	9826.25		1705.91
	5078.11		1669.71
	2694.71		3633.97
	7474.09		5554.79
			3864.88
			3693.42
			2727.48
			3817.25
			11377.8
			1848.42
			1986.36
			3521.57
			4092.36
			7226.8
		Sample3	6173.22
			3664.84
			1862.52
			6606.46
			8507.09
			5420.67
			7650.13
			1455.95
			5351.32
			5505.64
			3065.46
			4580.86
			3932.71
			7767.87
			3853.45
			1166.36
unit:μm2

## Sheet: Figure 2A, 2C and 2E
Figure 2A, 2C and 2E. The effect of TBT on liver metabolism.
Name	HMDB	m/z	Fold Change	P value	VIP	L-A-11	L-A-26	L-A-35	L-A-38	L-A-52	L-A-60	L-A-68	L-A-6	L-A-73	L-A-78	L-A-87	L-A-8	L-B-12	L-B-20	L-B-22	L-B-23	L-B-27	L-B-32	L-B-58	L-B-59	L-B-61	L-B-63	L-B-72	L-B-85	L-QC-10	L-QC-1	L-QC-2	L-QC-3	L-QC-4	L-QC-5	L-QC-6	L-QC-7	L-QC-8	L-QC-9
(S)-5-Diphosphomevalonic acid	HMDB0001090	309.015	17.2315	0.0013295	2.40427	6.13184e-07	4.91601e-07	3.86333e-07	7.43755e-07	4.50729e-07	3.51678e-07	3.74556e-07	5.93671e-07	4.30075e-07	6.82893e-07	2.91096e-07	2.26531e-07	1.32304e-05	7.71929e-06	6.77324e-06	8.42773e-06	8.31364e-06	4.64092e-06	4.92882e-06	7.99052e-06	6.09949e-06	9.7188e-06	6.44271e-06	1.28329e-05	2.58556e-06	3.02178e-06	2.41625e-06	2.05594e-06	2.68149e-06	3.02307e-06	2.98374e-06	2.83652e-06	3.04111e-06	2.78591e-06
Bovinic acid	HMDB0003797	279.233	0.435438	0.00163317	1.41319	1.96777e-05	1.91147e-05	1.98693e-05	1.91688e-05	3.36247e-05	2.45856e-05	2.76592e-05	2.87243e-05	1.62628e-05	1.92186e-05	1.53163e-05	2.22887e-05	4.68037e-06	1.23995e-05	4.1311e-06	9.8884e-06	1.24811e-05	1.09098e-05	9.37801e-06	1.1194e-05	8.52176e-06	9.01844e-06	1.33536e-05	9.65732e-06	1.70229e-05	1.94261e-05	1.79367e-05	1.96663e-05	2.39218e-05	2.35632e-05	1.21695e-05	1.75794e-05	1.31192e-05	8.65993e-06
11-Dehydrocorticosterone	HMDB0004029	345.204	1.39588	0.00958495	1.30231	1.04588e-05	1.21425e-05	1.32064e-05	1.04114e-05	1.29448e-05	6.48332e-06	9.05154e-06	1.44586e-05	1.36032e-05	1.36485e-05	1.24472e-05	1.14076e-05	1.50084e-05	1.53888e-05	2.29685e-05	1.62279e-05	1.46379e-05	1.48342e-05	1.86694e-05	1.52451e-05	1.91822e-05	1.5759e-05	1.12618e-05	1.66083e-05	1.26341e-05	1.65306e-05	1.38827e-05	1.33639e-05	1.18849e-05	1.27158e-05	1.4233e-05	1.20774e-05	1.45461e-05	1.51877e-05
5,6-Epoxytetraene	HMDB0061111	335.222	0.536657	0.00958495	1.44756	7.33599e-06	1.92394e-05	1.55868e-05	1.31138e-05	1.54308e-05	2.06265e-05	8.24416e-06	1.46052e-05	1.21589e-05	1.3498e-05	1.21124e-05	1.80513e-05	3.53063e-06	8.77331e-06	3.60284e-06	1.13047e-05	1.37758e-05	7.0675e-06	1.15464e-05	5.71519e-06	6.38367e-06	6.83837e-06	5.25239e-06	7.44258e-06	9.69777e-06	8.5929e-06	7.63226e-06	7.72754e-06	8.47168e-06	9.57169e-06	9.30107e-06	8.88885e-06	1.06292e-05	1.01035e-05
6-Chloro-N-(1-methylethyl)-1,3,5-triazine-2,4-diamine	HMDB0033249	188.069	0.791469	0.00958495	1.36506	0.000233188	0.000241262	0.000251916	0.000281724	0.000270191	0.000232636	0.000255849	0.000198593	0.000266758	0.000289464	0.000244406	0.000285589	0.000237603	0.00015649	0.000192701	0.000213224	0.000196208	0.000162686	0.000185825	0.00018682	0.000273759	0.000212348	0.000164386	0.000233178	0.000212537	0.000185206	0.000172474	0.000152633	0.000169394	0.00019799	0.000199354	0.000205332	0.000233972	0.000207711
FAD	HMDB0001248	786.168	1.42123	0.00958495	1.44938	6.27963e-05	8.33836e-05	8.01473e-05	7.94459e-05	9.46515e-05	5.36617e-05	8.17553e-05	5.91919e-05	9.78439e-05	9.33591e-05	8.23422e-05	8.1036e-05	0.000125038	0.000146918	0.000146464	0.000100035	9.16563e-05	0.000142889	0.00010149	8.69016e-05	8.78882e-05	0.00010656	9.18713e-05	0.000121909	0.000102256	9.07251e-05	8.19982e-05	7.48335e-05	7.91454e-05	9.30881e-05	9.90773e-05	9.59331e-05	0.00010573	0.000111446
LysoPC(15:0)	HMDB0010381	480.311	0.609476	0.00958495	1.40114	0.00325377	0.00204247	0.00278966	0.00183719	0.00225012	0.0018796	0.00215731	0.00225613	0.00252665	0.00243359	0.0024537	0.00386887	0.00110105	0.00166419	0.000842812	0.00152739	0.00192204	0.00158996	0.00160485	0.0019395	0.00238824	0.00158885	0.000723963	0.00123848	0.00182053	0.00193914	0.00172671	0.00166906	0.00219553	0.0020712	0.00147374	0.00159787	0.00151427	0.00131213
Elaidic acid	HMDB0000573	281.249	0.378826	0.00958495	1.52654	1.04533e-05	1.03898e-05	8.15449e-06	1.35701e-05	1.14414e-05	2.06989e-05	1.9311e-05	1.75686e-05	7.33688e-06	1.01707e-05	3.92997e-06	9.92683e-06	3.73938e-06	4.53467e-06	1.95044e-06	4.83644e-06	2.42549e-06	5.27539e-06	4.49081e-06	3.84096e-06	3.93116e-06	3.85093e-06	1.19336e-05	3.34463e-06	8.24979e-06	8.15887e-06	7.29628e-06	7.5573e-06	8.77852e-06	8.40092e-06	6.06805e-06	5.97285e-06	5.61231e-06	5.60718e-06
Maslinic acid	HMDB0002392	471.352	0.291477	0.00958495	1.50382	6.44024e-06	4.45396e-06	3.77875e-06	8.12679e-06	5.48895e-06	1.24794e-05	1.07409e-05	1.07084e-05	3.662e-06	6.62334e-06	1.34922e-06	7.69332e-06	1.64266e-06	1.89539e-06	2.68436e-07	1.39652e-06	1.85307e-06	1.57104e-06	1.97179e-06	1.436e-06	2.02911e-06	1.80971e-06	6.51682e-06	1.37808e-06	3.66905e-06	4.31905e-06	3.68582e-06	3.94395e-06	5.2874e-06	4.53113e-06	3.04637e-06	3.26568e-06	2.91424e-06	3.25964e-06
Urobilin	HMDB0004160	589.307	0.639588	0.00997011	1.36602	2.34583e-06	1.93271e-06	2.15476e-06	1.86713e-06	1.2433e-06	1.65871e-06	1.38248e-06	2.31612e-06	1.8912e-06	1.87017e-06	1.51423e-06	2.55654e-06	1.02834e-06	1.37889e-06	5.64485e-07	1.09928e-06	1.68031e-06	1.05535e-06	1.15949e-06	1.73676e-06	1.90716e-06	1.40832e-06	5.52486e-07	9.68999e-07	1.92352e-06	2.05577e-06	1.62435e-06	2.06455e-06	1.90563e-06	1.99204e-06	7.78771e-07	1.49865e-06	8.41359e-07	1.47154e-06
9,12,13-TriHOME	HMDB0004708	329.234	0.595602	0.0101235	1.2894	4.22326e-05	5.07574e-05	5.10004e-05	3.37897e-05	6.24804e-05	8.34429e-05	3.64286e-05	5.76452e-05	4.28095e-05	4.5091e-05	3.19302e-05	5.82504e-05	3.3749e-05	2.4535e-05	2.36269e-05	3.02562e-05	4.59484e-05	3.07651e-05	4.45961e-05	2.70141e-05	2.99536e-05	2.32686e-05	1.36772e-05	2.75042e-05	3.24824e-05	3.3693e-05	3.1728e-05	3.40915e-05	3.81092e-05	3.35298e-05	2.90399e-05	2.97242e-05	3.0084e-05	2.82815e-05
6-Keto-prostaglandin F1a	HMDB0002886	369.229	0.417205	0.0101235	1.43056	1.05373e-05	3.3511e-05	2.48834e-05	2.29523e-05	2.77019e-05	4.15038e-05	1.18979e-05	2.23779e-05	1.72084e-05	2.25629e-05	1.34368e-05	2.98729e-05	6.48473e-06	1.20841e-05	2.05187e-06	1.07867e-05	2.56557e-05	4.46439e-06	2.13258e-05	6.61495e-06	4.59263e-06	1.17861e-05	3.14082e-06	7.18134e-06	1.3827e-05	9.10737e-06	8.88987e-06	1.00154e-05	1.38493e-05	1.01102e-05	6.3567e-06	1.34944e-05	6.29589e-06	7.70536e-06
Terephthalic acid	HMDB0002428	165.018	0.588328	0.0102901	1.27407	8.71597e-05	4.38831e-05	6.10839e-05	5.16736e-05	4.87327e-05	7.76099e-05	8.93863e-05	3.91872e-05	7.13656e-05	6.64865e-05	5.03316e-05	4.9297e-05	3.3539e-05	2.91036e-05	1.54752e-05	2.91597e-05	4.47113e-05	3.6836e-05	4.1348e-05	5.44169e-05	6.03808e-05	4.66061e-05	1.39972e-05	2.75513e-05	4.56604e-05	4.94035e-05	4.3651e-05	6.20186e-05	3.42066e-05	4.79272e-05	3.61789e-05	4.0821e-05	2.67733e-05	2.15047e-05
Dephospho-CoA	HMDB0001373	688.158	1.85033	0.0107236	1.06976	2.53408e-06	4.26174e-06	3.80394e-06	3.05786e-06	6.50924e-06	2.08724e-06	6.06181e-06	1.74114e-06	1.08557e-05	4.9613e-06	7.91649e-06	4.61513e-06	1.00309e-05	8.54392e-06	1.02081e-05	8.18988e-06	5.83918e-06	1.27966e-05	7.06812e-06	8.46657e-06	1.28709e-05	8.52981e-06	4.56811e-06	1.09578e-05	7.28119e-06	7.0555e-06	6.46459e-06	6.49949e-06	6.67781e-06	7.21493e-06	7.82109e-06	6.91996e-06	8.32001e-06	7.99061e-06
8-Oxoguanine	HMDB0041820	164.021	0.655324	0.010846	1.33323	0.000871039	0.000557935	0.000606704	0.000549448	0.000642062	0.000819758	0.000472494	0.000307159	0.000718525	0.000671269	0.00056756	0.000610992	0.000433495	0.000426626	0.000236405	0.000397028	0.000627042	0.000304373	0.000502984	0.000320117	0.000487844	0.000438722	0.000244054	0.000427399	0.000544874	0.000632723	0.00063157	0.000589813	0.000788991	0.0006549	0.00052222	0.00051935	0.000463247	0.000218121
cis-Aconitic acid	HMDB0000072	173.009	3.78301	0.011101	1.4153	2.32328e-05	0	5.1078e-06	0	0	0	7.31665e-05	1.09889e-05	6.74878e-06	4.91967e-06	2.29108e-05	0	7.58498e-05	6.55485e-05	5.68876e-05	4.11791e-05	0	3.16425e-05	2.69931e-05	5.20796e-05	6.16364e-05	4.3385e-05	2.67581e-05	7.44283e-05	6.22064e-05	5.30699e-05	5.35292e-05	6.25088e-05	6.26183e-05	5.75886e-05	5.06797e-05	4.43039e-05	4.37853e-05	3.47038e-05
Docosahexaenoic acid	HMDB0002183	329.246	0.727934	0.0111084	1.14276	0.000480677	0.000319576	0.000508067	0.000340112	0.000333269	0.000374185	0.000501734	0.000427514	0.000523016	0.000383759	0.000460949	0.000613898	0.000297835	0.000318886	0.000345237	0.00030596	0.000367791	0.000237971	0.000359213	0.000337059	0.000360698	0.000347922	0.000221473	0.000333805	0.000395196	0.000481742	0.000362268	0.000291505	0.000305576	0.000374409	0.000346189	0.000335644	0.000412037	0.000364532
LysoPC(18:2(9Z,12Z))	HMDB0010386	520.338	0.741197	0.0113749	1.17064	0.0164522	0.0199762	0.0231507	0.0201784	0.0256597	0.0193991	0.0259486	0.0195354	0.0291368	0.0198844	0.0198821	0.0246669	0.0139013	0.0149285	0.0119689	0.0125587	0.0220239	0.0168816	0.0166049	0.0204006	0.0222676	0.0175032	0.0123011	0.0142396	0.0172625	0.0191843	0.0171603	0.0159767	0.0161011	0.0169072	0.0187121	0.0249648	0.021908	0.019706
Hordatine A	HMDB0030461	565.288	0.68726	0.0113749	1.29843	4.22887e-05	2.94833e-05	3.22295e-05	2.46243e-05	3.21569e-05	3.2937e-05	2.89538e-05	3.20652e-05	2.98131e-05	3.2027e-05	3.27523e-05	4.66285e-05	1.68584e-05	2.50247e-05	1.29734e-05	2.37739e-05	3.42606e-05	2.4057e-05	2.19265e-05	3.23756e-05	2.99557e-05	2.25373e-05	1.14391e-05	1.69446e-05	2.92521e-05	3.51359e-05	2.32797e-05	2.15086e-05	3.62234e-05	3.46443e-05	2.09329e-05	2.18916e-05	2.2249e-05	2.39305e-05
Palmitic acid	HMDB0000220	255.231	0.68417	0.0123522	1.3997	2.17561e-05	2.21512e-05	2.30517e-05	1.79881e-05	2.35797e-05	2.09574e-05	1.74592e-05	1.87586e-05	2.187e-05	2.2082e-05	1.83301e-05	3.81166e-05	1.4004e-05	1.54285e-05	1.04058e-05	1.25092e-05	1.70824e-05	1.66111e-05	1.7778e-05	1.85033e-05	2.11366e-05	1.62691e-05	9.81115e-06	1.25193e-05	1.74222e-05	1.77171e-05	1.5475e-05	1.97106e-05	1.75659e-05	1.5555e-05	1.45433e-05	1.56548e-05	1.46665e-05	1.49849e-05
Crustecdysone	HMDB0030180	479.299	0.596325	0.0125912	1.3854	0.000103727	0.000137629	0.000200908	9.35333e-05	0.000132486	8.37066e-05	0.000115795	0.000205315	0.000149708	0.000101231	0.000133561	0.000203202	5.51142e-05	8.74729e-05	4.57558e-05	6.30172e-05	9.6391e-05	0.000103688	7.02141e-05	0.000122873	0.000135603	8.48671e-05	6.19025e-05	6.34796e-05	0.000108379	0.000110542	9.7441e-05	0.000118851	0.000119667	0.000108755	8.50203e-05	8.78425e-05	7.51894e-05	8.26417e-05
Pantetheine 4'-phosphate	HMDB0001416	359.105	1.62414	0.0126462	1.34256	4.20235e-05	5.67965e-05	4.98984e-05	5.70206e-05	7.03813e-05	2.94609e-05	6.72082e-05	7.80123e-06	8.98229e-05	6.33632e-05	8.09548e-05	5.19017e-05	0.000117078	9.05391e-05	0.00012761	9.72667e-05	5.57007e-05	0.000108007	8.53945e-05	6.99818e-05	0.000100605	7.60459e-05	4.69583e-05	0.000107522	7.18569e-05	7.80037e-05	6.85348e-05	6.31847e-05	7.64075e-05	8.6114e-05	8.27482e-05	7.48803e-05	8.53415e-05	8.05478e-05
Guanidinosuccinic acid	HMDB0003157	176.066	0.785629	0.0126462	1.22449	5.90007e-05	6.08905e-05	6.0538e-05	6.1384e-05	5.49428e-05	4.64095e-05	5.07492e-05	4.54749e-05	6.39336e-05	6.31799e-05	5.02559e-05	6.461e-05	3.37528e-05	2.93986e-05	5.53977e-05	4.95607e-05	4.61868e-05	5.46871e-05	3.52986e-05	4.71808e-05	5.0451e-05	5.05817e-05	3.29261e-05	4.98809e-05	4.91974e-05	4.1264e-05	4.16924e-05	3.76054e-05	3.48285e-05	4.64442e-05	4.88063e-05	5.5772e-05	3.99334e-05	5.23073e-05
Allantoin	HMDB0000462	157.036	0.598223	0.0126462	1.23684	0.000539516	0.000785909	0.000597506	0.000325861	0.000631738	0.000850529	0.00039624	0.000411522	0.000443233	0.000551635	0.000288096	0.00056556	0.000184091	0.000278746	0.000202084	0.000339874	0.000402321	0.000280313	0.0005469	0.000332441	0.000285387	0.000359354	0.000278954	0.000330593	0.000361874	0.000367784	0.000330083	0.000389059	0.000407032	0.000404016	0.00032087	0.000329202	0.000295929	0.000307249
S-Adenosylhomocysteine	HMDB0000939	385.129	1.56708	0.0130808	1.10026	8.2919e-05	8.8234e-05	0.000108196	0.000137707	0.000121871	8.15049e-05	0.000137354	3.40614e-05	0.000138639	0.000128649	0.000142543	7.99189e-05	0.000203082	0.000157907	0.000181581	0.000168603	0.000115814	0.000172984	0.000147922	0.000114271	0.000128645	0.000223985	0.000124686	0.000268882	0.000148501	0.000154201	0.00014196	0.000127186	0.000132701	0.000150799	0.0001571	0.000160585	0.000173638	0.000165124
Riboflavin	HMDB0000244	377.147	0.802729	0.0130834	1.27614	0.000325153	0.000444962	0.000423141	0.000418961	0.000376888	0.000464045	0.00041869	0.000227622	0.000395627	0.000417772	0.000381456	0.000395029	0.000347595	0.00031308	0.000312974	0.000347274	0.000340653	0.000318463	0.000333295	0.000279047	0.000307385	0.000321777	0.000208723	0.000334009	0.000328186	0.000312924	0.000280304	0.000269426	0.000266357	0.000321586	0.000345028	0.000326041	0.000358897	0.000350429
FADH	HMDB0001197	788.174	1.3818	0.0130834	1.23275	4.65984e-06	6.77898e-06	6.09228e-06	6.67501e-06	7.27343e-06	3.93297e-06	6.56335e-06	3.6678e-06	8.52062e-06	8.11225e-06	6.57323e-06	6.15191e-06	1.03647e-05	1.12555e-05	1.11239e-05	7.39379e-06	7.29871e-06	1.0136e-05	8.26396e-06	6.77152e-06	6.5848e-06	8.05891e-06	6.31001e-06	1.00752e-05	7.9032e-06	7.20773e-06	7.8662e-06	7.16989e-06	6.48027e-06	7.59504e-06	7.76989e-06	7.83152e-06	8.95311e-06	8.8488e-06
Hypoxanthine	HMDB0000157	137.046	1.7423	0.0130834	1.1049	0.00161153	0.0015233	0.00181805	0.00543388	0.00374174	0.000239077	0.00517365	0.00624491	0.00520855	0.00359081	0.00594172	0.00250359	0.00902098	0.00662043	0.00813874	0.00672932	0.00383804	0.0053712	0.00450317	0.00357524	0.00646787	0.00547017	0.00778408	0.00745356	0.00546633	0.00552586	0.00491466	0.00450667	0.00482355	0.00538822	0.00580689	0.00563209	0.00630405	0.00584183
5-Methyltetrahydrofolic acid	HMDB0001396	460.195	1.74897	0.0130834	1.55496	4.31342e-05	3.52485e-05	2.31981e-05	5.35682e-05	6.27279e-05	5.75134e-06	6.56285e-05	1.31352e-05	6.085e-05	6.01168e-05	3.89247e-05	3.00604e-05	9.58166e-05	6.96755e-05	0.000105428	5.59961e-05	5.14351e-05	8.83864e-05	5.22651e-05	6.27766e-05	5.63838e-05	7.11656e-05	3.85956e-05	0.00011317	4.86523e-05	5.96361e-05	4.8198e-05	4.45774e-05	5.05296e-05	5.44477e-05	5.91048e-05	5.64725e-05	5.87214e-05	5.83021e-05
D-Leucine	HMDB0013773	132.102	0.862707	0.0130834	1.33486	0.00785103	0.00780336	0.00802592	0.00929392	0.00837506	0.00742655	0.00924726	0.00684779	0.00917652	0.00928899	0.00846214	0.00880483	0.00799416	0.00644737	0.00759511	0.00730141	0.00695784	0.00689999	0.00666363	0.00716139	0.00883832	0.00720618	0.00565822	0.00806763	0.00709137	0.00659173	0.00613067	0.00575116	0.00604099	0.0068963	0.00760153	0.0069611	0.00794497	0.00756541
Glycyrrhetinic acid	HMDB0011628	469.337	0.30524	0.0130834	1.31346	6.01423e-06	6.0913e-06	3.55178e-06	7.53389e-06	5.94194e-06	1.27229e-05	8.27072e-06	1.69351e-05	2.73325e-06	6.01149e-06	1.96656e-06	8.40694e-06	2.18077e-06	3.0158e-06	1.36231e-06	7.6936e-07	1.97123e-06	1.69799e-06	1.9898e-06	2.42044e-06	1.57236e-06	9.28361e-07	5.60143e-06	2.79573e-06	5.17088e-06	5.34922e-06	5.21633e-06	4.89631e-06	5.51323e-06	6.38081e-06	3.70254e-06	4.1556e-06	3.31673e-06	3.40779e-06
Guanosine monophosphate	HMDB0001397	362.051	0.731252	0.0130834	1.08958	1.67355e-05	1.24424e-05	1.76671e-05	2.0117e-05	2.0953e-05	1.33069e-05	2.08051e-05	1.40675e-05	1.62582e-05	1.88573e-05	1.60528e-05	2.01202e-05	8.70912e-06	1.29932e-05	1.15126e-05	8.68072e-06	1.32858e-05	1.25332e-05	1.4541e-05	1.26355e-05	2.15679e-05	1.3441e-05	1.25208e-05	9.22844e-06	1.08463e-05	1.1403e-05	1.09778e-05	1.32139e-05	1.37707e-05	1.27526e-05	1.01638e-05	1.02864e-05	1.39696e-05	1.08262e-05
LysoPC(17:0)	HMDB0012108	508.342	0.489089	0.0130834	1.26133	6.77937e-06	3.02893e-06	4.67244e-06	3.42843e-06	3.22364e-06	3.49214e-06	5.64704e-06	9.13772e-07	6.52694e-06	5.76479e-06	4.31484e-06	7.90769e-06	1.71152e-06	2.44643e-06	7.5822e-07	1.47005e-06	3.27529e-06	2.68988e-06	2.03614e-06	3.41522e-06	5.23046e-06	2.31521e-06	4.04611e-07	1.48926e-06	2.82858e-06	2.65622e-06	2.90588e-06	2.67358e-06	2.51131e-06	3.18605e-06	2.07893e-06	2.23327e-06	2.5078e-06	1.85984e-06
Citric acid	HMDB0000094	193.035	0.844977	0.0131165	1.36055	7.28751e-05	8.74101e-05	8.3595e-05	8.56215e-05	6.9819e-05	6.88051e-05	6.13469e-05	7.63936e-05	8.05198e-05	8.98691e-05	7.77975e-05	8.37288e-05	5.36712e-05	5.62538e-05	7.48379e-05	7.0234e-05	6.13685e-05	6.29857e-05	6.38458e-05	6.13666e-05	8.76943e-05	6.76744e-05	6.49771e-05	6.74945e-05	6.70105e-05	6.64965e-05	5.77051e-05	5.51672e-05	5.60423e-05	6.62041e-05	7.30992e-05	6.26621e-05	7.40509e-05	6.99099e-05
Prednisone	HMDB0014773	359.183	1.59452	0.0131771	1.1179	7.76022e-07	7.62091e-07	1.20051e-06	7.42657e-07	1.5395e-06	9.48587e-07	1.21498e-06	1.06694e-06	1.19609e-06	1.34706e-06	1.40714e-06	1.74572e-06	1.47413e-06	2.14369e-06	3.03896e-06	1.95833e-06	1.80407e-06	1.67367e-06	2.14372e-06	1.48807e-06	1.06381e-06	1.43434e-06	1.22393e-06	2.79258e-06	1.8961e-06	2.02917e-06	1.58322e-06	1.34835e-06	1.51359e-06	1.99032e-06	1.97806e-06	1.57133e-06	2.12932e-06	1.97807e-06
Glutathione	HMDB0000125	308.092	1.57677	0.0131998	1.37883	0.0044409	0.00466006	0.00616211	0.00866722	0.00443905	0.00256914	0.0071818	0.0028173	0.0080398	0.00540089	0.00529671	0.00204626	0.0104079	0.00812069	0.00690863	0.00702236	0.00320304	0.011136	0.00637854	0.00957648	0.00955728	0.00888751	0.00660615	0.0095156	0.0053763	0.00603836	0.00542575	0.00496319	0.00551751	0.0057687	0.00597836	0.00577835	0.00631109	0.00581328
Epinephrine	HMDB0000068	184.097	1.85783	0.0131998	1.28202	3.95511e-06	1.60801e-06	4.13235e-06	7.50301e-06	1.46383e-05	2.62837e-06	1.29543e-05	6.69583e-06	9.10646e-06	9.36386e-06	8.30818e-06	4.09488e-06	1.92161e-05	1.20832e-05	1.56837e-05	1.26568e-05	1.18484e-05	1.40936e-05	9.2651e-06	8.85415e-06	1.13528e-05	1.05998e-05	7.73122e-06	2.45099e-05	1.80868e-05	1.49865e-05	1.40083e-05	1.30446e-05	2.36472e-05	1.47664e-05	1.79535e-05	1.37298e-05	1.91177e-05	1.93936e-05
Formiminoglutamic acid	HMDB0000854	175.072	0.396183	0.0131998	1.2802	0.000618162	0.00102972	0.000829606	0.00179169	0.0017324	0.00202769	0.000383573	0.000353402	0.00107147	0.00108615	0.000539156	0.00184188	0.000400015	0.00039154	0.000349468	0.000357226	0.00104194	0.000696441	0.000482014	0.000452906	0.00018738	0.000268597	6.81436e-05	0.000575494	0.000636461	0.000601703	0.000544835	0.000519718	0.000533425	0.000601887	0.000680786	0.000591322	0.000660576	0.000645894
Buprenorphine	HMDB0015057	466.295	0.614311	0.0131998	1.23951	8.28846e-06	1.05085e-05	1.06092e-05	6.02695e-06	1.30249e-05	7.23235e-06	8.30437e-06	8.24703e-06	9.07714e-06	8.05916e-06	8.71928e-06	1.81724e-05	4.82949e-06	8.17632e-06	5.0294e-06	3.53724e-06	6.37996e-06	8.00698e-06	5.55613e-06	6.67622e-06	9.64301e-06	5.88212e-06	3.18674e-06	4.52221e-06	6.85167e-06	7.72957e-06	5.70885e-06	9.03518e-06	8.26926e-06	7.55892e-06	5.66948e-06	4.1824e-06	4.64054e-06	5.93493e-06
Alpha-Tocotrienol	HMDB0006327	423.328	1.1973	0.0139193	1.30316	1.93851e-05	2.33109e-05	1.63006e-05	1.87146e-05	2.33557e-05	2.19387e-05	1.85649e-05	2.83244e-05	1.8759e-05	2.11667e-05	2.02867e-05	1.89773e-05	2.55733e-05	2.75005e-05	2.42169e-05	2.45319e-05	2.49747e-05	2.43279e-05	3.02204e-05	2.02777e-05	2.20206e-05	2.05187e-05	2.71629e-05	2.69045e-05	2.87298e-05	2.98627e-05	2.40057e-05	2.88062e-05	3.18034e-05	2.69892e-05	1.84289e-05	2.26535e-05	1.74905e-05	2.32677e-05
Bicalutamide	HMDB0015260	431.066	0.738992	0.0139212	1.09295	1.47563e-06	1.84804e-06	1.64625e-06	1.98404e-06	1.79361e-06	1.80143e-06	1.34296e-06	5.87023e-07	1.6646e-06	1.79834e-06	1.40904e-06	1.76014e-06	1.19326e-06	1.18499e-06	1.31864e-06	1.25205e-06	1.20069e-06	1.22005e-06	1.30701e-06	1.01435e-06	9.73158e-07	1.63988e-06	8.37139e-07	9.81743e-07	1.53606e-06	1.49356e-06	1.1385e-06	1.00525e-06	1.18132e-06	1.38794e-06	8.39328e-07	1.37962e-06	1.46638e-06	1.2034e-06
Emedastine	HMDB0015216	301.203	0.650364	0.0143053	1.16625	2.46345e-05	1.15677e-05	1.45629e-05	1.62534e-05	1.6275e-05	2.08339e-05	2.62317e-05	1.02256e-05	2.11252e-05	1.80653e-05	1.39168e-05	1.97859e-05	1.14579e-05	1.07136e-05	5.35206e-06	1.06916e-05	1.33198e-05	1.26318e-05	1.24561e-05	1.52246e-05	2.08533e-05	1.34173e-05	4.41523e-06	8.30512e-06	1.43575e-05	1.50935e-05	9.89326e-06	1.26744e-05	1.36388e-05	1.27679e-05	1.13988e-05	1.0755e-05	1.08981e-05	9.62e-06
Niacinamide	HMDB0001406	123.056	1.24538	0.0150447	1.01195	2.95656e-05	4.39851e-05	3.31569e-05	4.03329e-05	3.81298e-05	2.40639e-05	3.41726e-05	5.28514e-05	3.64462e-05	3.75338e-05	3.91768e-05	4.00095e-05	4.74085e-05	4.40959e-05	5.70822e-05	5.02756e-05	2.82996e-05	4.29797e-05	5.0329e-05	4.5495e-05	4.97064e-05	4.64101e-05	4.78951e-05	4.97258e-05	4.68644e-05	2.93261e-05	3.11372e-05	3.09956e-05	3.59856e-05	4.45539e-05	7.07313e-05	5.19266e-05	4.82873e-05	4.68492e-05
L-Palmitoylcarnitine	HMDB0000222	400.342	0.478347	0.0153032	1.39317	0.00348264	0.00333976	0.00277525	0.00476426	0.00373487	0.00604537	0.00367359	0.00647784	0.00190335	0.00405804	0.000973899	0.00342996	0.00124531	0.00178507	0.00119196	0.00135396	0.00149644	0.0011686	0.00182327	0.00117879	0.0011652	0.0011145	0.0062657	0.00157363	0.00230512	0.00246011	0.002316	0.00219799	0.00213548	0.0023544	0.00257289	0.00257694	0.00248023	0.0025591
Calcidiol	HMDB0003550	401.345	0.475291	0.0153032	1.4028	0.000872321	0.000854108	0.000725136	0.00126392	0.000929601	0.00155232	0.000939445	0.0016577	0.0004808	0.00106123	0.000248906	0.000868596	0.000305872	0.00045076	0.00030638	0.000352692	0.000381374	0.000294288	0.000470215	0.000293573	0.000288942	0.000287366	0.00160485	0.000407713	0.000587019	0.000619388	0.000566334	0.000544557	0.000544844	0.000623487	0.000644369	0.000659759	0.000637734	0.000642212
Alpha-Linolenoyl ethanolamide	HMDB0013624	322.273	0.688686	0.0153032	1.1903	2.99513e-05	1.45369e-05	2.40495e-05	1.81278e-05	1.90366e-05	2.29736e-05	3.48353e-05	1.63926e-05	3.06437e-05	2.74351e-05	2.66615e-05	2.44684e-05	1.29241e-05	1.77218e-05	8.94295e-06	1.50488e-05	2.10844e-05	1.99324e-05	1.63036e-05	2.45847e-05	2.51015e-05	1.42129e-05	9.52168e-06	1.37285e-05	2.10328e-05	1.63328e-05	1.66235e-05	1.2397e-05	2.16026e-05	1.82507e-05	1.38577e-05	1.46592e-05	2.08627e-05	1.78977e-05
Verapamil	HMDB0001850	455.294	0.667263	0.0153509	1.2927	0.00219283	0.00206069	0.00284554	0.00178109	0.00213028	0.00138478	0.00164791	0.00229978	0.00230699	0.00232351	0.0019232	0.00416407	0.00125099	0.00160313	0.00133543	0.00143796	0.00159364	0.00167259	0.0015888	0.00199438	0.0019871	0.00150264	0.000771341	0.00131858	0.0017131	0.00173236	0.00152682	0.00148482	0.00143462	0.00179181	0.00184144	0.00176906	0.00192905	0.0018577
Biflorin	HMDB0002336	353.09	0.676839	0.0153746	1.24377	0.000121182	0.000180883	0.000155019	0.000149216	0.000186394	0.000184794	0.000129546	7.13568e-05	0.000132391	0.000222162	8.28834e-05	0.000142412	0.000105677	8.66777e-05	7.46675e-05	0.000122842	0.000143211	0.000109423	0.000133782	8.06643e-05	0.000111177	8.21237e-05	7.53789e-05	6.4421e-05	9.86578e-05	0.00010026	9.10443e-05	0.000107061	0.000109838	0.000109536	9.40963e-05	8.7256e-05	7.68859e-05	8.86317e-05
Punicic acid	HMDB0030963	277.218	0.58846	0.0161111	1.17732	3.28324e-05	1.73693e-05	2.18594e-05	1.85862e-05	1.81136e-05	3.10882e-05	3.59315e-05	1.07603e-05	3.56062e-05	2.68102e-05	3.31148e-05	2.79024e-05	9.34537e-06	1.62367e-05	2.78734e-06	1.22539e-05	1.52364e-05	2.16452e-05	1.55797e-05	2.80534e-05	2.90165e-05	1.79311e-05	2.52142e-06	1.18006e-05	1.53742e-05	1.55647e-05	1.65855e-05	1.92138e-05	1.95751e-05	1.91934e-05	1.63406e-05	1.71835e-05	1.47267e-05	1.29602e-05
9,10-DHOME	HMDB0004704	313.239	0.734718	0.0163247	1.15005	7.27065e-06	5.32082e-06	6.70946e-06	5.77947e-06	7.8405e-06	7.15155e-06	9.10555e-06	3.33266e-06	9.20924e-06	7.49825e-06	5.91237e-06	7.53947e-06	5.54578e-06	4.58266e-06	3.55724e-06	6.43748e-06	4.49138e-06	4.56971e-06	5.94923e-06	6.00358e-06	5.6049e-06	6.7484e-06	2.82306e-06	4.42572e-06	6.53404e-06	6.02253e-06	5.8763e-06	6.14066e-06	7.10809e-06	5.72044e-06	5.71658e-06	6.85635e-06	4.35525e-06	4.1244e-06
5a-Cholesta-7,24-dien-3b-ol	HMDB0006842	385.35	1.25044	0.0170143	1.25479	4.70031e-05	4.27067e-05	4.60129e-05	3.27253e-05	3.83828e-05	2.79004e-05	4.32643e-05	5.3815e-05	3.27001e-05	3.68073e-05	3.65014e-05	3.77721e-05	4.63638e-05	4.26118e-05	5.58333e-05	4.47017e-05	7.06341e-05	4.83518e-05	4.69209e-05	5.66342e-05	3.76203e-05	4.46297e-05	4.81345e-05	5.22605e-05	4.9105e-05	6.16652e-05	5.09752e-05	4.84467e-05	4.88901e-05	5.16299e-05	4.52846e-05	4.44398e-05	4.70069e-05	5.37939e-05
LysoPC(16:1(9Z)/0:0)	HMDB0010383	492.311	0.542606	0.018128	1.28691	2.05211e-06	3.22636e-06	4.3229e-06	2.13256e-06	4.30351e-06	1.26248e-06	2.42481e-06	3.79548e-06	3.81505e-06	2.57804e-06	3.35185e-06	7.33666e-06	1.31346e-06	2.07229e-06	1.20549e-06	1.64639e-06	2.1826e-06	2.0117e-06	1.39758e-06	2.67274e-06	3.16516e-06	1.68061e-06	1.24047e-06	1.44231e-06	2.43616e-06	2.66513e-06	2.28116e-06	2.10489e-06	2.22139e-06	2.2828e-06	1.86415e-06	1.78776e-06	2.03911e-06	2.13405e-06
Linoleic acid	HMDB0000673	281.246	0.675747	0.0183177	1.21564	7.11369e-05	3.52516e-05	6.2128e-05	4.56888e-05	6.41544e-05	5.21435e-05	0.000101816	4.45274e-05	7.52829e-05	6.95376e-05	6.56904e-05	6.19411e-05	2.73427e-05	4.81627e-05	2.21103e-05	3.79415e-05	5.14789e-05	5.34518e-05	3.87941e-05	6.44494e-05	6.93526e-05	4.13466e-05	2.04639e-05	3.14416e-05	5.61662e-05	5.83747e-05	4.65351e-05	3.59224e-05	5.33388e-05	4.91876e-05	3.24168e-05	3.64986e-05	5.66869e-05	4.85931e-05
Hexadecanedioic acid	HMDB0000672	285.208	0.651714	0.018513	1.13912	5.01392e-05	2.24481e-05	2.86887e-05	2.8024e-05	2.82341e-05	4.19232e-05	5.35648e-05	1.88267e-05	4.0243e-05	3.51812e-05	2.6571e-05	3.39343e-05	2.32611e-05	1.87607e-05	8.46563e-06	1.87337e-05	2.7062e-05	2.29208e-05	2.52914e-05	2.93695e-05	3.86647e-05	2.78488e-05	9.90223e-06	1.54741e-05	2.59392e-05	2.70584e-05	2.34758e-05	2.66391e-05	2.62035e-05	2.5995e-05	2.33942e-05	2.51255e-05	2.03222e-05	2.10325e-05
LysoPC(18:3(6Z,9Z,12Z))	HMDB0010387	518.324	0.630188	0.0187985	1.1594	0.000773492	0.000830473	0.00147689	0.00114193	0.0012759	0.00095962	0.00125586	0.000619816	0.00224272	0.000838948	0.00138076	0.00109657	0.000668101	0.000593673	0.000364085	0.000620307	0.000825924	0.00106149	0.000574232	0.00106204	0.000850903	0.000935687	0.000553349	0.000645384	0.000790179	0.000636357	0.000683431	0.00064359	0.000670131	0.00068574	0.000790945	0.000762754	0.000908853	0.000945878
Drostanolone	HMDB0014996	303.233	0.736188	0.0190267	1.07135	0.000401442	0.000243041	0.000305607	0.000263607	0.000301977	0.000340432	0.000358969	0.000136037	0.000370279	0.00037043	0.0003184	0.000364964	0.000227457	0.000234348	0.000131525	0.000298937	0.000249035	0.000201066	0.000285697	0.000270485	0.000327752	0.000248063	0.00011164	0.00019324	0.000244024	0.000242955	0.000222472	0.000253443	0.000277295	0.000280019	0.000213124	0.000227601	0.000206906	0.000214854
Glutaric acid	HMDB0000661	131.034	0.642593	0.0190267	1.57191	2.39294e-05	2.75956e-05	4.37372e-05	2.23037e-05	5.95357e-05	4.09124e-05	4.36645e-05	1.54982e-05	3.25705e-05	2.76943e-05	3.46972e-05	3.26168e-05	2.00413e-05	1.34865e-05	1.84776e-05	1.92671e-05	3.93014e-05	1.85648e-05	2.25137e-05	1.09543e-05	2.9475e-05	2.22386e-05	2.32153e-05	2.25573e-05	1.33861e-05	1.63231e-05	1.46186e-05	1.45692e-05	2.27775e-05	1.43682e-05	1.2415e-05	2.41531e-05	1.11297e-05	1.56525e-05
D-1-Piperideine-2-carboxylic acid	HMDB0001084	128.071	0.682054	0.0196576	1.60088	1.28248e-05	2.16111e-05	2.198e-05	2.27059e-05	4.42172e-05	2.73441e-05	2.04171e-05	1.94915e-05	3.38677e-05	2.73102e-05	2.91383e-05	2.17596e-05	1.58914e-05	2.47599e-05	2.46812e-05	1.66984e-05	1.0173e-05	1.1251e-05	1.34435e-05	1.44435e-05	1.71045e-05	1.94991e-05	1.6412e-05	2.20783e-05	1.28817e-05	1.90475e-05	1.5236e-05	1.57837e-05	1.76765e-05	1.9179e-05	1.62939e-05	1.9152e-05	1.92829e-05	2.86624e-05
(2S,4R,5S)-Muscarine	HMDB0029936	174.149	0.661751	0.0197939	1.1859	1.52551e-05	7.63716e-06	8.98379e-06	9.57156e-06	6.48953e-06	8.91606e-06	1.73925e-05	5.84669e-06	1.02444e-05	9.9955e-06	8.27696e-06	9.26843e-06	6.76126e-06	5.14498e-06	5.11624e-06	5.96793e-06	6.96744e-06	5.79922e-06	4.80883e-06	7.94181e-06	1.19977e-05	6.80227e-06	5.04657e-06	5.65137e-06	7.4818e-06	7.10491e-06	6.71924e-06	5.90104e-06	6.32107e-06	7.23872e-06	7.80916e-06	7.97194e-06	9.18489e-06	7.67979e-06
Mupirocin	HMDB0014554	501.308	2.03654	0.0199235	1.8793	3.22475e-06	4.179e-05	1.18833e-05	8.34114e-06	1.86255e-05	3.27762e-05	1.62551e-05	1.81783e-05	7.9294e-06	1.6684e-05	4.89845e-05	6.38509e-05	0.000102727	5.87368e-05	6.75913e-05	3.75509e-05	4.6077e-05	6.76646e-05	2.79981e-05	3.24864e-05	4.80768e-05	1.44881e-05	5.03277e-05	3.38651e-05	1.85225e-05	1.76624e-05	1.71959e-05	1.67068e-05	1.63276e-05	1.81422e-05	3.15028e-05	1.75787e-05	2.00519e-05	2.01754e-05
Adipic acid	HMDB0000448	145.05	0.271735	0.0199235	1.23315	6.4733e-05	0.000258161	0.000574992	0.000653768	0.000133181	0.000942902	0.00028313	0.000655367	0.000123976	0.000198417	4.81047e-05	0.000645064	2.61691e-05	0.000117271	9.49397e-06	0.000153552	7.73024e-05	5.75912e-05	0.000237599	1.48474e-05	0.000126127	4.55833e-05	0.000349819	2.96756e-05	0.000176427	0.000166519	0.000158753	0.000177485	0.000193054	0.000215893	0.000157807	0.000155608	0.000144723	0.000146438
PC(22:5(4Z,7Z,10Z,13Z,16Z)/14:1(9Z))	HMDB0008657	778.536	0.813386	0.0204899	1.11061	0.000101069	8.00662e-05	7.53431e-05	6.77203e-05	5.79712e-05	6.08835e-05	7.43207e-05	6.46413e-05	7.07669e-05	7.13957e-05	5.8012e-05	6.68203e-05	4.69604e-05	6.45833e-05	4.41971e-05	7.16553e-05	5.55552e-05	5.21847e-05	7.25113e-05	5.72568e-05	5.28061e-05	7.4781e-05	5.45253e-05	4.35569e-05	5.7272e-05	5.88527e-05	5.07118e-05	4.12866e-05	3.95864e-05	7.83373e-05	7.85667e-05	5.81495e-05	7.58061e-05	7.30219e-05
2-Arachidonylglycerol	HMDB0004666	379.283	0.629551	0.020517	1.18945	3.76952e-05	1.45984e-05	1.19473e-05	1.98279e-05	1.15027e-05	1.88782e-05	2.07008e-05	1.58153e-05	2.49684e-05	1.33334e-05	2.90027e-05	2.19321e-05	1.28698e-05	1.2176e-05	8.96317e-06	1.15193e-05	1.52625e-05	1.72413e-05	1.15942e-05	2.14494e-05	1.49969e-05	8.76137e-06	5.04359e-06	1.13422e-05	2.0233e-05	1.81199e-05	1.33572e-05	1.40423e-05	1.39428e-05	1.77402e-05	2.31141e-05	1.78798e-05	1.82847e-05	2.05693e-05
PE(14:0/22:5(4Z,7Z,10Z,13Z,16Z))	HMDB0008845	736.493	0.478581	0.020517	1.43064	1.37352e-05	1.39373e-05	2.30246e-05	1.21043e-05	1.04479e-05	2.1574e-05	1.1818e-05	7.71463e-06	1.54865e-05	9.90895e-06	9.67062e-06	1.07974e-05	1.60451e-05	9.22221e-07	6.60183e-06	4.59206e-07	1.66404e-06	1.81133e-05	4.87823e-07	1.20763e-05	4.60369e-06	3.2878e-07	4.80292e-07	1.48954e-05	7.4761e-06	1.90201e-05	1.81989e-05	1.5256e-05	1.72122e-05	1.27386e-05	1.15839e-05	1.76199e-05	8.94722e-06	1.15997e-05
Sarmentosin	HMDB0030697	276.108	2.35872	0.0207399	1.18675	3.52461e-06	4.04937e-06	3.38444e-06	2.03642e-05	6.84378e-06	7.3077e-06	9.60652e-06	3.88813e-06	1.70714e-05	1.25386e-05	1.14281e-05	1.17685e-05	2.57616e-05	2.99991e-05	4.14678e-05	1.60007e-05	1.46559e-05	1.8365e-05	1.46646e-05	1.43162e-05	1.25082e-05	5.74436e-06	5.36399e-05	1.65236e-05	1.76438e-05	1.32996e-05	1.10777e-05	1.07596e-05	1.08946e-05	1.25182e-05	1.18387e-05	1.44332e-05	1.54165e-05	1.81059e-05
14,15-DiHETrE	HMDB0002265	337.24	0.583341	0.0210631	1.15583	4.04311e-06	2.31011e-06	2.40546e-06	2.33314e-06	1.80844e-06	3.74335e-06	5.71998e-06	1.41374e-06	4.12841e-06	3.08579e-06	3.6333e-06	3.81507e-06	1.15255e-06	2.1872e-06	4.01225e-07	7.52152e-07	2.42786e-06	2.50665e-06	1.45531e-06	3.12264e-06	4.17223e-06	2.18134e-06	4.6565e-07	1.59877e-06	2.46564e-06	2.29191e-06	2.06303e-06	2.64845e-06	2.32547e-06	2.11345e-06	2.21429e-06	1.77827e-06	1.80686e-06	1.76685e-06
Piroxicam	HMDB0014694	330.055	1.44094	0.0222314	1.14559	1.0638e-05	1.09393e-05	1.04179e-05	1.70717e-05	8.96574e-06	2.02847e-06	1.60697e-05	1.83468e-05	1.56276e-05	1.11481e-05	8.13477e-06	4.68349e-06	1.91263e-05	1.48974e-05	1.209e-05	1.51212e-05	8.80313e-06	1.93034e-05	1.20596e-05	1.61948e-05	2.06813e-05	1.63412e-05	1.9856e-05	1.87149e-05	1.29051e-05	9.31866e-06	1.16975e-05	1.3666e-05	1.35336e-05	1.08451e-05	1.09844e-05	1.02333e-05	9.73703e-06	8.49595e-06
Mollicellin C	HMDB0033341	411.108	0.780152	0.0223736	1.2141	3.97518e-06	4.86844e-06	4.06183e-06	5.26097e-06	5.03661e-06	6.71979e-06	5.19432e-06	2.16906e-06	4.51823e-06	4.75087e-06	4.69214e-06	4.37427e-06	4.6414e-06	3.5245e-06	2.72959e-06	3.80022e-06	4.65014e-06	3.6448e-06	3.6754e-06	3.33558e-06	3.81896e-06	3.79958e-06	1.9843e-06	3.7889e-06	3.75371e-06	3.52735e-06	3.4257e-06	4.29937e-06	4.18667e-06	3.9637e-06	3.14965e-06	3.64481e-06	3.21377e-06	3.31075e-06
L-Methionine	HMDB0000696	148.043	0.814983	0.0225028	1.08516	0.000102899	8.34047e-05	8.53782e-05	0.0001091	0.000111209	0.00011035	0.000114747	5.16338e-05	0.000108032	0.000121251	9.76812e-05	9.96083e-05	0.000101427	7.26393e-05	6.35888e-05	7.25782e-05	0.000100692	7.74825e-05	7.71942e-05	7.81059e-05	0.000103368	7.80706e-05	6.4804e-05	8.41938e-05	7.49317e-05	7.01774e-05	7.62702e-05	7.79927e-05	8.62463e-05	8.18215e-05	6.76078e-05	7.59174e-05	6.10229e-05	6.90148e-05
Bisoprolol	HMDB0014750	324.218	0.635314	0.0226401	1.10769	1.44363e-05	6.32521e-06	7.77916e-06	7.16233e-06	6.7844e-06	1.03756e-05	1.48264e-05	4.29229e-06	1.0295e-05	7.7484e-06	1.00172e-05	9.26637e-06	4.44716e-06	6.55278e-06	1.79298e-06	4.27756e-06	7.4175e-06	6.25139e-06	5.28208e-06	8.56034e-06	1.2059e-05	6.43026e-06	1.68095e-06	4.69333e-06	7.6533e-06	6.51895e-06	6.32737e-06	6.58152e-06	7.65591e-06	6.34299e-06	5.09585e-06	5.99973e-06	6.1476e-06	5.99184e-06
Equol	HMDB0002209	241.087	4.3914	0.0226401	1.41527	0	0	0	2.44248e-06	4.23035e-06	0	0	0	0	6.4267e-06	0	4.66625e-06	1.82423e-05	6.46569e-06	1.32113e-05	1.26129e-06	2.04401e-06	1.44809e-06	1.28961e-05	0	3.67198e-06	4.99454e-06	8.31283e-06	5.46855e-06	1.10906e-05	1.20729e-05	1.2211e-05	1.23893e-05	1.44511e-05	1.08039e-05	1.17375e-05	9.92735e-06	9.70084e-06	9.77458e-06
dCDP	HMDB0001245	386.019	1.57373	0.0226401	1.15715	1.48113e-05	1.86274e-05	1.47377e-05	2.25972e-05	1.2756e-05	2.58076e-06	2.16776e-05	3.05396e-06	2.36974e-05	1.21128e-05	1.59201e-05	4.61998e-06	2.13801e-05	2.51385e-05	1.39464e-05	2.00616e-05	7.64969e-06	2.62629e-05	1.93144e-05	2.3513e-05	3.38016e-05	3.01718e-05	1.72738e-05	2.46019e-05	1.56878e-05	1.86322e-05	1.60197e-05	1.68403e-05	2.30494e-05	2.00701e-05	1.52807e-05	1.44883e-05	1.05271e-05	1.46583e-05
Itaconic acid	HMDB0002092	129.018	0.713503	0.0232486	1.12761	2.04775e-05	1.29701e-05	1.52156e-05	1.81719e-05	1.38363e-05	1.76511e-05	2.98435e-05	1.03143e-05	1.92825e-05	2.02472e-05	1.89953e-05	1.67996e-05	1.06634e-05	1.47583e-05	5.94122e-06	9.14097e-06	1.87622e-05	1.38812e-05	1.1989e-05	1.61545e-05	1.93669e-05	1.45414e-05	6.18521e-06	1.1166e-05	1.74951e-05	1.91998e-05	1.57928e-05	1.89509e-05	1.71995e-05	1.81469e-05	1.29193e-05	1.22173e-05	1.1277e-05	1.2472e-05
Tartaric acid	HMDB0000956	149.009	0.682429	0.0232598	1.35733	0.00139147	0.0008512	0.000983382	0.000884225	0.00098811	0.000354154	0.00119534	0.000673692	0.00119234	0.00112797	0.0010118	0.00109957	0.000861896	0.000820856	0.00031335	0.000715677	0.000288191	0.000774021	0.000844002	0.000304516	0.00120508	0.000850478	0.000315699	0.000727011	0.000953376	0.00118336	0.00107867	0.00135052	0.0012493	0.00117702	0.000844313	0.00084952	0.000721492	0.000838182
Adenosine monophosphate	HMDB0000045	348.072	1.36429	0.0237814	1.38279	6.66646e-06	9.39509e-06	8.65802e-06	8.32107e-06	1.337e-05	5.92785e-06	1.52373e-05	6.11212e-06	1.10442e-05	9.38673e-06	9.03895e-06	8.53592e-06	1.26006e-05	1.53856e-05	2.12645e-05	1.09635e-05	8.31099e-06	1.48048e-05	1.18849e-05	9.72124e-06	1.04392e-05	1.20098e-05	1.12561e-05	1.37421e-05	1.43526e-05	1.02864e-05	9.48313e-06	8.85133e-06	9.58227e-06	1.22011e-05	1.04787e-05	1.16673e-05	1.14957e-05	1.20227e-05
9,10,13-TriHOME	HMDB0004710	329.234	0.611329	0.0241238	1.10682	3.41325e-05	3.80495e-05	2.78621e-05	1.96283e-05	3.63429e-05	6.22056e-05	2.47196e-05	3.76949e-05	4.13432e-05	1.43042e-05	1.19896e-05	4.38864e-05	3.07251e-05	1.40062e-05	2.17427e-05	1.47131e-05	3.03168e-05	2.04251e-05	1.84057e-05	1.95402e-05	1.90248e-05	1.19326e-05	6.11366e-06	3.2792e-05	1.99076e-05	1.65354e-05	1.57192e-05	1.9894e-05	2.05164e-05	2.74586e-05	2.05367e-05	1.53891e-05	2.23364e-05	1.37493e-05
Phosphorylcholine	HMDB0001565	184.072	0.805356	0.0241717	1.05089	0.000746447	0.000572472	0.000746299	0.000811499	0.000769468	0.000719652	0.00102302	0.000455712	0.000992506	0.00082199	0.000750764	0.000831346	0.000629981	0.000581191	0.000505957	0.000512578	0.000659961	0.000616646	0.000641474	0.00074891	0.000715029	0.000823785	0.000381507	0.000625413	0.00065975	0.000687333	0.000615444	0.000574278	0.000564597	0.000277555	0.000751128	0.000661082	0.000355104	0.000621791
LysoPC(16:0)	HMDB0010382	496.339	0.861755	0.0244155	1.02665	0.0285283	0.0273546	0.0300147	0.0278921	0.0364539	0.0300734	0.0321287	0.0340569	0.0367142	0.0313121	0.0204026	0.0361725	0.0298551	0.0233753	0.0240347	0.0221599	0.0276981	0.0256835	0.0296226	0.0289251	0.0275449	0.0266452	0.0236733	0.0305829	0.0284414	0.0293727	0.0236919	0.0230538	0.0221374	0.0271758	0.0251537	0.0255645	0.0294884	0.0292909
Aesculin	HMDB0030820	339.075	0.431601	0.0246582	1.28412	3.54174e-05	2.93999e-05	1.88361e-05	2.3255e-05	3.80573e-05	7.67228e-05	2.24644e-05	6.22303e-06	2.29805e-05	7.34548e-05	1.02941e-05	4.42863e-05	2.89378e-05	1.34894e-05	1.18937e-05	1.3326e-05	3.0974e-05	1.24894e-05	2.28808e-05	1.05642e-05	7.90921e-06	6.36985e-06	7.97781e-06	6.42896e-06	1.37772e-05	1.5372e-05	1.23221e-05	1.66957e-05	1.64054e-05	1.40847e-05	1.17512e-05	9.75018e-06	1.00182e-05	1.01618e-05
Pyridoxamine 5'-phosphate	HMDB0001555	249.062	0.825072	0.0247835	1.2235	0.000218108	0.000158243	0.000200942	0.000191277	0.000231137	0.000140468	0.000182768	0.000142573	0.000230915	0.000184315	0.000190132	0.000196954	0.000166083	0.000121469	0.00019464	0.000161474	0.000144105	0.000145129	0.000122797	0.000131313	0.000184636	0.000162124	0.000119836	0.00021752	0.000139138	0.000130367	0.000130498	0.000114576	0.000125148	0.000137485	0.000153081	0.000183448	0.000203636	0.000148518
dIDP	HMDB0003536	411.01	1.82188	0.0250509	1.00744	3.32928e-07	4.28023e-07	2.88592e-07	6.56375e-07	3.32122e-07	1.48507e-07	7.32011e-07	3.3969e-07	8.10958e-07	5.58261e-07	1.07939e-06	2.94912e-07	1.90086e-06	7.43474e-07	1.13984e-06	6.11414e-07	4.11187e-07	1.3177e-06	1.0138e-06	5.6361e-07	1.22998e-06	6.19544e-07	2.76781e-07	1.10632e-06	1.04869e-06	5.16943e-07	9.35942e-07	4.77076e-07	7.39935e-07	6.62781e-07	6.87431e-07	6.94412e-07	5.46802e-07	7.96213e-07
Imidazoleacetic acid riboside	HMDB0002331	259.093	1.39469	0.0276693	1.0672	4.76471e-05	8.49316e-05	0.000120779	9.37787e-05	0.000140968	4.77141e-05	0.00010418	9.59791e-05	0.00010711	7.97113e-05	0.000106271	0.00014378	0.000140369	0.000196585	0.000165822	0.000125049	7.17599e-05	0.000173362	0.000130685	6.95521e-05	0.000132933	9.97904e-05	0.000132548	0.000197307	0.000133474	0.000132684	0.000124713	0.000112577	0.000119663	0.000135606	0.000139966	0.000138678	0.000147515	0.000146002
Casimiroin	HMDB0033349	232.059	0.69991	0.0280125	1.03557	2.33878e-05	3.6423e-05	3.91625e-05	4.02901e-05	7.46503e-05	3.93935e-05	5.20321e-05	1.82637e-05	3.68873e-05	4.19886e-05	3.79614e-05	3.56262e-05	3.58457e-05	2.68018e-05	2.49404e-05	2.57161e-05	2.44251e-05	2.48395e-05	2.10597e-05	1.63992e-05	3.77284e-05	3.59513e-05	1.94274e-05	4.00692e-05	2.30959e-05	2.77954e-05	2.56787e-05	3.21698e-05	2.78885e-05	3.61657e-05	2.10877e-05	2.42109e-05	2.53509e-05	2.39261e-05
Gibberellin A3	HMDB0003559	345.132	1.25541	0.0287937	1.04167	2.42766e-06	3.54376e-06	2.62435e-06	2.48522e-06	2.79659e-06	2.10938e-06	2.31407e-06	4.35895e-06	2.30077e-06	2.57619e-06	2.88496e-06	2.68283e-06	3.09896e-06	3.17902e-06	4.22967e-06	3.96375e-06	2.4919e-06	3.61118e-06	4.25224e-06	2.63861e-06	4.36982e-06	2.26534e-06	4.17639e-06	3.28308e-06	4.01464e-06	3.46222e-06	4.29052e-06	3.79297e-06	5.19244e-06	4.13278e-06	2.9553e-06	3.56385e-06	3.66074e-06	3.52798e-06
Phosphatidyl-N-methylethanolamine	HMDB0061372	675.481	1.63036	0.0292234	1.04463	1.15207e-06	1.46431e-06	3.40802e-07	1.21349e-06	1.85148e-06	4.54597e-07	1.24194e-06	6.88265e-07	8.73502e-07	8.38105e-07	2.17574e-06	1.20647e-06	1.64472e-06	2.38191e-06	1.21416e-06	2.31383e-06	2.73245e-06	2.96781e-06	2.7827e-06	5.9364e-07	1.35364e-06	8.4073e-07	1.1319e-06	2.05359e-06	1.29304e-06	2.01688e-06	9.81936e-07	1.8868e-06	1.8313e-06	1.53075e-06	1.58287e-06	1.49458e-06	2.41402e-06	1.55019e-06
Metoprolol	HMDB0001932	268.188	1.13847	0.029489	1.14848	0.000100258	0.000146304	0.000112501	0.000132056	0.000139801	0.000110684	0.000112822	0.000162595	0.000136376	0.000129285	0.000141385	0.0001273	0.000139099	0.000142103	0.000178596	0.000156885	0.000116944	0.000149627	0.000151786	0.000122504	0.000143105	0.000139935	0.000169494	0.000156109	0.000146691	0.000119672	0.000125743	0.000117027	0.000123531	0.00014403	0.000151603	0.000144142	0.000165533	0.000156108
Cholesteryl acetate	HMDB0003822	429.373	0.794793	0.0295944	1.11395	0.000220944	0.000159996	0.000196046	0.000133075	0.000147124	0.000197633	0.000168444	0.000206874	0.000174444	0.000163419	0.000227476	0.000217145	9.46434e-05	0.000171352	0.000116626	0.000168053	0.000201782	0.000217923	0.000105282	0.000190313	0.000113586	0.000149735	0.000120777	0.000108502	0.00018227	0.000198899	0.000187061	0.00017988	0.000165598	0.000163506	0.000177631	0.000120089	0.000146707	0.000175043
Beta-Glycerophosphoric acid	HMDB0002520	171.006	2.45891	0.0302563	1.25086	0.000118691	3.373e-05	2.06501e-05	0.000105002	0.000269294	1.78325e-05	9.19548e-05	4.06749e-05	0.000234616	0.000119536	0.000111994	8.13655e-05	0.000563643	0.000238355	0.000400444	9.30487e-05	8.74717e-05	0.000352813	0.000187191	0.000126323	5.19406e-05	0.000347382	4.91379e-05	0.000564438	0.000154142	0.000146467	0.000140014	0.000166345	0.000180092	0.000172211	0.000146107	0.000145447	0.000133834	0.0001316
N-alpha-Acetyl-L-lysine	HMDB0000446	189.124	0.535344	0.0303723	1.26003	9.37257e-06	2.10343e-05	6.7581e-06	1.29667e-05	1.08251e-05	5.9005e-06	1.66022e-05	2.64483e-06	5.90186e-06	6.81677e-06	5.96729e-06	5.91876e-06	7.02992e-06	3.92432e-06	2.88413e-06	5.1548e-06	3.92696e-06	3.99829e-06	3.35698e-06	4.62079e-06	1.161e-05	5.30246e-06	3.9994e-06	3.45941e-06	5.29427e-06	4.60555e-06	3.93414e-06	3.31123e-06	3.81306e-06	5.16449e-06	4.82228e-06	5.23133e-06	5.88952e-06	4.17319e-06
Myricitrin	HMDB0034360	465.101	0.79102	0.030436	1.07426	8.90137e-06	8.57798e-06	8.17451e-06	8.75428e-06	7.38151e-06	6.85285e-06	9.3311e-06	4.74331e-06	9.71541e-06	9.65645e-06	9.35875e-06	7.56623e-06	8.08201e-06	4.65676e-06	6.15988e-06	6.62014e-06	6.97962e-06	5.09581e-06	4.89527e-06	6.58721e-06	1.10031e-05	6.53806e-06	3.7408e-06	7.96326e-06	6.03745e-06	6.37528e-06	5.14744e-06	5.14854e-06	5.59132e-06	6.45673e-06	5.83731e-06	5.93194e-06	6.89568e-06	5.77716e-06
Lithocholate 3-O-glucuronide	HMDB0002513	553.34	0.505705	0.0310855	1.35158	7.23475e-06	8.65524e-06	3.03199e-05	1.383e-05	3.45079e-05	3.92889e-05	2.00397e-05	2.53883e-06	3.06295e-05	1.98357e-05	1.10355e-05	1.04566e-05	1.14256e-05	7.2985e-06	1.73074e-05	4.55348e-06	1.05211e-05	5.30572e-06	1.07272e-05	1.02544e-05	4.87163e-06	1.21678e-05	1.22031e-05	8.85314e-06	1.23905e-05	1.19978e-05	8.90128e-06	8.6244e-06	1.04045e-05	1.25052e-05	1.11379e-05	9.52242e-06	1.26604e-05	1.39573e-05
LysoPC(22:4(7Z,10Z,13Z,16Z))	HMDB0010401	572.37	0.797066	0.0314235	1.03113	0.000230699	0.000245189	0.000286593	0.000205412	0.000249214	0.0002548	0.000261099	0.000156438	0.000347253	0.000225906	0.000333651	0.000300606	0.000153671	0.000206832	0.000139535	0.000191104	0.000216078	0.000173145	0.000224402	0.00027799	0.000221359	0.000304765	0.000136664	0.000222856	0.000199318	0.000237801	0.000167436	0.000179075	0.000185137	0.000215647	0.00023656	0.000204448	0.000210558	0.000219338
L-Octanoylcarnitine	HMDB0000791	288.217	0.629807	0.0321906	1.20748	5.08455e-05	0.000116552	5.77222e-05	5.04178e-05	9.39416e-05	0.00012844	6.2063e-05	6.43393e-05	7.10467e-05	8.20865e-05	2.01667e-05	0.000119625	0.000107717	2.52154e-05	3.96818e-05	4.05008e-05	3.54158e-05	2.93089e-05	5.51213e-05	5.05697e-05	3.32671e-05	3.00002e-05	6.995e-05	6.09394e-05	7.06852e-05	6.21184e-05	6.14445e-05	5.90743e-05	5.6765e-05	6.66425e-05	7.5362e-05	6.86263e-05	7.55137e-05	7.4784e-05
Hetacillin	HMDB0014877	390.152	2.26864	0.0323967	1.01336	4.06542e-07	6.18444e-07	4.09221e-07	8.07776e-07	2.32451e-07	9.10259e-08	4.40075e-07	4.1629e-07	6.07283e-07	6.78381e-07	1.55165e-07	3.99223e-07	4.72159e-07	8.99069e-07	1.21627e-06	6.35226e-07	4.9153e-07	2.8546e-07	6.08826e-07	1.42276e-06	7.99882e-07	4.41384e-07	1.94191e-06	2.72281e-06	1.06849e-06	9.08874e-07	9.37652e-07	7.45914e-07	8.74186e-07	1.03085e-06	1.19198e-06	1.15776e-06	1.34267e-06	1.32798e-06
N2-gamma-Glutamylglutamine	HMDB0011738	274.107	0.882405	0.0323967	1.13291	4.03588e-06	3.84728e-06	4.35562e-06	4.77692e-06	5.72219e-06	4.16201e-06	4.74525e-06	3.66058e-06	5.31567e-06	5.2439e-06	4.51924e-06	3.99662e-06	4.34261e-06	4.21589e-06	3.50297e-06	3.79713e-06	3.637e-06	4.71313e-06	3.90195e-06	3.93843e-06	4.29566e-06	3.36847e-06	4.07428e-06	4.19866e-06	3.14949e-06	3.96346e-06	3.57411e-06	3.78555e-06	4.40085e-06	4.07474e-06	3.83156e-06	3.71799e-06	3.1375e-06	3.32094e-06
Risperidone	HMDB0005020	411.223	2.02984	0.0324895	1.44346	7.94831e-07	1.36834e-06	1.40734e-06	2.08904e-06	2.74817e-06	1.17748e-06	1.20204e-06	2.49069e-06	1.91948e-06	2.16656e-06	3.28212e-06	4.55926e-06	2.93448e-06	4.33632e-06	1.14349e-05	4.7889e-06	2.73339e-06	2.69811e-06	3.67466e-06	2.59583e-06	1.66765e-06	2.42243e-06	3.92894e-06	7.9472e-06	2.89826e-06	2.98e-06	2.5545e-06	2.41812e-06	2.55325e-06	2.68096e-06	3.1349e-06	3.1476e-06	3.04486e-06	2.90757e-06
(N-acetylneuraminosyl(a2-6)lactosamine)	HMDB0001081	673.234	0.779682	0.032989	1.33982	1.69288e-05	1.5649e-05	1.50702e-05	1.03416e-05	1.52201e-05	1.05537e-05	8.77163e-06	1.45685e-05	1.22256e-05	1.37484e-05	1.12492e-05	1.32316e-05	5.18635e-06	1.09921e-05	8.50351e-06	9.91971e-06	1.29018e-05	1.15452e-05	1.24907e-05	1.43675e-05	1.50594e-05	9.36253e-06	4.75164e-06	7.76487e-06	1.32569e-05	1.69776e-05	1.31173e-05	1.53e-05	1.74085e-05	1.70115e-05	1.08369e-05	1.17659e-05	9.84929e-06	1.20241e-05
Phosphoribosyl pyrophosphate	HMDB0000280	388.943	1.92109	0.0333061	1.42311	3.65919e-06	3.20155e-06	1.44979e-06	4.57984e-06	8.54708e-06	1.53593e-06	4.41458e-06	2.43532e-06	9.56446e-06	2.95638e-06	4.00664e-06	1.41203e-06	1.207e-05	1.11197e-05	1.17244e-05	3.95894e-06	3.65847e-06	1.20873e-05	4.9271e-06	3.93735e-06	2.96874e-06	9.77614e-06	1.50481e-06	1.40235e-05	5.0349e-06	3.89574e-06	4.86128e-06	5.10114e-06	6.09334e-06	5.01882e-06	3.98218e-06	3.54487e-06	3.77311e-06	3.72123e-06
PE(22:2(13Z,16Z)/16:1(9Z))	HMDB0009551	770.57	1.41568	0.0339867	1.13333	7.03847e-07	9.74491e-07	1.16477e-06	7.93002e-07	1.17184e-06	1.25711e-06	1.00946e-06	7.10235e-07	9.10695e-07	1.3705e-06	1.52777e-06	9.08583e-07	2.61308e-06	1.09354e-06	1.10878e-06	1.15407e-06	1.21366e-06	1.08672e-06	2.18354e-06	8.17467e-07	1.44273e-06	1.31672e-06	1.46744e-06	2.20148e-06	1.37755e-06	1.3681e-06	1.29242e-06	9.75544e-07	1.24255e-06	1.58321e-06	1.27824e-06	1.50099e-06	1.20301e-06	1.44599e-06
Hexobarbital	HMDB0015444	237.124	0.65965	0.0346269	1.00587	1.20556e-05	7.79473e-06	7.60629e-06	8.92602e-06	5.03765e-06	9.38036e-06	1.35822e-05	5.0499e-06	7.77443e-06	8.64531e-06	7.69194e-06	8.84583e-06	4.45755e-06	5.20703e-06	3.44887e-06	5.78882e-06	6.68542e-06	2.6107e-06	2.63146e-06	7.73895e-06	1.54771e-05	4.64184e-06	3.90227e-06	4.95168e-06	5.82699e-06	5.22964e-06	5.07465e-06	4.43136e-06	4.4888e-06	5.58575e-06	5.82951e-06	5.02241e-06	6.33643e-06	5.34001e-06
12-Keto-tetrahydro-leukotriene B4	HMDB0002995	337.239	0.663643	0.0346269	1.12869	5.86702e-06	4.43519e-06	8.586e-06	4.23093e-06	4.60781e-06	5.62064e-06	6.20674e-06	9.7362e-07	8.19058e-06	3.96105e-06	3.22331e-06	3.29456e-06	1.8052e-06	3.10723e-06	3.05166e-06	4.61745e-06	3.30323e-06	3.20609e-06	3.64192e-06	4.23007e-06	4.67941e-06	2.31973e-06	1.38927e-06	3.93471e-06	3.89781e-06	2.45321e-06	3.95589e-06	4.0899e-06	3.3981e-06	2.96205e-06	3.43879e-06	4.36884e-06	2.35464e-06	3.3994e-06
Maclurin	HMDB0032644	261.042	0.808715	0.0346775	1.0799	1.85642e-06	1.42206e-06	1.6028e-06	1.89549e-06	2.2585e-06	2.02066e-06	2.66338e-06	1.35212e-06	2.2759e-06	2.40739e-06	1.72043e-06	1.86443e-06	2.01859e-06	1.80829e-06	1.22576e-06	1.78264e-06	1.59302e-06	1.15704e-06	1.46608e-06	1.25277e-06	2.16224e-06	1.8543e-06	9.35143e-07	1.61919e-06	1.11554e-06	1.98936e-06	1.37894e-06	1.72085e-06	1.56793e-06	1.64556e-06	1.15833e-06	1.47431e-06	1.10165e-06	9.93991e-07
Stearidonic acid	HMDB0006547	277.215	0.630626	0.0350954	1.02273	2.75263e-05	1.15127e-05	1.90406e-05	1.30077e-05	9.94483e-06	1.41006e-05	3.018e-05	8.85045e-06	2.89786e-05	1.61713e-05	2.90615e-05	2.16179e-05	8.46737e-06	1.19595e-05	4.53465e-06	8.16898e-06	9.878e-06	2.26205e-05	9.64566e-06	2.46329e-05	1.76969e-05	1.3855e-05	2.88897e-06	1.06909e-05	1.4295e-05	1.54277e-05	9.99187e-06	9.59597e-06	9.89672e-06	1.492e-05	1.73874e-05	1.2596e-05	1.65092e-05	1.44903e-05
Soyasapogenol D	HMDB0034507	473.399	0.762874	0.0362153	1.35335	2.59626e-06	3.47214e-06	4.91718e-06	2.39069e-06	3.75584e-06	4.26188e-06	2.61094e-06	2.72731e-06	2.43528e-06	2.66506e-06	3.5096e-06	3.87645e-06	3.65861e-06	2.40079e-06	2.62497e-06	3.38686e-06	2.38508e-06	1.68146e-06	1.24472e-06	1.91981e-06	1.72831e-06	2.39829e-06	3.90755e-06	2.58244e-06	3.02572e-06	2.5308e-06	4.53217e-06	4.75434e-06	2.60883e-06	4.78836e-06	3.64469e-06	4.27665e-06	2.78758e-06	4.41872e-06
LysoPC(20:5(5Z,8Z,11Z,14Z,17Z))	HMDB0010397	542.324	0.631721	0.0363982	1.02915	0.00075411	0.000644662	0.0008043	0.00133799	0.00194653	0.000849401	0.00186853	0.000670808	0.0025338	0.00137886	0.000810151	0.0013583	0.000892099	0.000551526	0.000582769	0.000615074	0.00142256	0.000965824	0.000521574	0.000766298	0.000880026	0.0010433	0.000441086	0.0007668	0.00091619	0.000698943	0.000705	0.000625598	0.000723249	0.000751826	0.000908144	0.00077089	0.000850622	0.000837344
Sphingosine 1-phosphate	HMDB0000277	380.253	1.15714	0.0367963	1.09299	8.00233e-07	6.98115e-07	5.01795e-07	7.56703e-07	8.05773e-07	5.93026e-07	6.9402e-07	8.29106e-07	8.67758e-07	7.14832e-07	6.27525e-07	8.14775e-07	8.74792e-07	6.98757e-07	9.11911e-07	9.46633e-07	6.48338e-07	8.57581e-07	7.34879e-07	6.56898e-07	8.7323e-07	1.09072e-06	8.55287e-07	9.22354e-07	7.32642e-07	6.40504e-07	7.52233e-07	5.5947e-07	6.2894e-07	7.03932e-07	8.34599e-07	9.12968e-07	9.04445e-07	8.21963e-07
LysoPC(18:4(6Z,9Z,12Z,15Z))	HMDB0010389	516.31	2.26068	0.0396298	1.20887	5.89707e-07	5.07662e-07	5.52177e-07	1.19115e-06	7.56901e-07	6.29652e-07	3.77569e-07	2.03033e-07	6.82856e-07	5.0105e-07	1.11059e-06	4.86354e-07	7.49026e-07	1.00336e-06	1.28904e-06	1.16793e-06	8.67593e-07	9.62056e-07	1.18909e-06	8.29891e-07	1.14211e-06	4.93692e-06	1.62882e-06	1.38978e-06	8.79675e-07	6.49025e-07	6.25138e-07	9.00188e-07	5.95696e-07	7.04961e-07	8.68286e-07	7.69617e-07	9.14701e-07	9.66041e-07
Repaglinide	HMDB0015048	451.263	0.698929	0.0403849	1.29552	2.31811e-05	1.39642e-05	1.63108e-05	1.18008e-05	1.25825e-05	1.8525e-05	1.66723e-05	1.10224e-05	1.85273e-05	1.53925e-05	1.45385e-05	1.30647e-05	9.10093e-06	8.77053e-06	1.75025e-06	5.25119e-06	1.89318e-05	1.41176e-05	9.43449e-06	2.00019e-05	1.93342e-05	1.20377e-05	3.26531e-06	7.71298e-06	1.28982e-05	1.74693e-05	1.47287e-05	1.68843e-05	1.93539e-05	1.90506e-05	1.01428e-05	1.37825e-05	1.00717e-05	1.22019e-05
Practolol	HMDB0015411	267.171	1.25297	0.0408583	1.09446	2.68945e-05	3.68314e-05	3.00915e-05	2.93391e-05	2.78648e-05	2.44939e-05	2.44094e-05	4.95533e-05	2.59949e-05	3.1847e-05	2.88165e-05	2.94277e-05	4.08583e-05	3.49291e-05	5.34085e-05	4.64297e-05	2.65232e-05	3.55998e-05	3.41804e-05	2.79194e-05	3.34718e-05	2.87343e-05	5.68754e-05	3.91124e-05	3.36603e-05	3.62644e-05	3.89586e-05	2.96838e-05	3.37729e-05	3.17539e-05	3.74069e-05	3.7986e-05	3.87526e-05	3.71969e-05
Capsaicin	HMDB0002227	306.205	1.26242	0.0417407	1.98136	2.84079e-06	4.6317e-06	3.79396e-06	4.16249e-06	5.95168e-06	4.04186e-06	3.43354e-06	3.75896e-06	5.48761e-06	6.1104e-06	5.07036e-06	5.44522e-06	5.37981e-06	7.24786e-06	7.8794e-06	7.7749e-06	5.11515e-06	5.74594e-06	6.05291e-06	4.80623e-06	7.3727e-06	4.3308e-06	3.20253e-06	4.18213e-06	3.50958e-06	3.13146e-06	2.7614e-06	3.12587e-06	2.93861e-06	2.19482e-06	3.40067e-06	2.79773e-06	2.47141e-06	2.68177e-06
Sphingosine	HMDB0000252	300.289	0.92227	0.0437102	1.40068	0.000518292	0.000628901	0.000603743	0.000558207	0.000587282	0.000535981	0.000550985	0.000555078	0.000679692	0.000590355	0.000557818	0.000636905	0.000541445	0.00051938	0.000555706	0.00053259	0.000512433	0.000450312	0.000573259	0.000496026	0.000566667	0.000512142	0.000675818	0.0005231	0.000629765	0.000620634	0.000555852	0.000524893	0.000515715	0.000628982	0.000656469	0.000585946	0.000652111	0.000599108
Bilirubin	HMDB0000054	585.269	0.601292	0.0437711	1.13249	5.29552e-05	2.15471e-05	2.90284e-05	3.58577e-05	4.51549e-05	8.74211e-05	8.11104e-05	1.31468e-05	6.40306e-05	3.44051e-05	2.56269e-05	2.61309e-05	3.91182e-05	2.41145e-05	1.712e-05	1.78063e-05	4.23854e-05	2.10916e-05	2.06707e-05	5.06507e-05	1.85331e-05	1.95481e-05	1.00125e-05	2.94651e-05	2.1682e-05	3.29163e-05	2.52762e-05	2.47227e-05	2.67692e-05	2.53065e-05	2.18274e-05	1.9019e-05	2.12908e-05	2.57393e-05
Zanamivir	HMDB0014698	331.128	0.704044	0.0451272	1.03455	8.39679e-07	3.74613e-07	1.19511e-06	1.3476e-06	6.87316e-07	1.60488e-06	7.9167e-07	9.04203e-07	1.58734e-06	1.10618e-06	9.29589e-07	3.74308e-07	7.15122e-07	6.24648e-07	2.73092e-07	8.3618e-07	8.12862e-07	6.18487e-07	5.9114e-07	9.68915e-07	8.6665e-07	8.77905e-07	4.45229e-07	6.3701e-07	7.73965e-07	7.62138e-07	6.9184e-07	8.73887e-07	9.52435e-07	4.1077e-07	7.64539e-07	7.20723e-07	4.5437e-07	7.77362e-07
Fosinopril	HMDB0014635	564.304	0.640582	0.0452769	1.01046	0.000279238	0.000224582	0.000267661	0.000459614	0.000660958	0.000301213	0.000615563	0.000209964	0.000906471	0.00047899	0.000265847	0.000435709	0.000307928	0.000171028	0.000205076	0.000167239	0.000557539	0.000328736	0.00020167	0.000295331	0.000279959	0.000353684	0.000146619	0.00025588	0.000277495	0.000213841	0.000257495	0.000244083	0.000243057	0.000273078	0.000287565	0.000280259	0.000275032	0.000294814
Urocanic acid	HMDB0000301	137.035	0.787654	0.0464	1.10515	7.82749e-06	1.0793e-05	9.04896e-06	1.517e-05	9.87544e-06	1.68593e-05	8.87046e-06	6.70536e-06	1.19837e-05	1.11567e-05	7.37859e-06	7.04018e-06	7.39875e-06	8.96555e-06	6.33187e-06	7.52816e-06	9.24465e-06	8.27563e-06	7.64908e-06	6.14156e-06	1.01667e-05	7.92602e-06	7.82273e-06	9.20162e-06	7.9791e-06	6.35263e-06	7.59083e-06	7.58172e-06	1.06072e-05	8.30162e-06	8.50192e-06	6.02936e-06	6.86386e-06	8.04408e-06
5-Phosphoribosylamine	HMDB0001128	228.028	1.72412	0.0470486	1.35643	6.17524e-05	7.91653e-05	5.87154e-05	4.35503e-05	8.36534e-05	0.000100529	5.63952e-05	5.25842e-05	5.99777e-05	7.16513e-05	6.42014e-05	6.33781e-05	6.27969e-05	5.91666e-05	0.000216536	6.63721e-05	0.000220975	0.000254342	7.88514e-05	0.000109779	9.86604e-05	5.57191e-05	5.29091e-05	9.55239e-05	6.31404e-05	7.24072e-05	5.75407e-05	0.000111926	8.28204e-05	7.77661e-05	4.90626e-05	8.91525e-05	4.75929e-05	5.49249e-05
9,10-Epoxyoctadecenoic acid	HMDB0004701	297.242	0.85558	0.0474906	1.72915	3.37383e-05	2.8078e-05	1.69134e-05	2.16772e-05	2.95983e-05	2.38332e-05	3.55398e-05	2.92798e-05	3.15504e-05	2.33724e-05	2.7786e-05	2.7389e-05	2.05527e-05	2.15512e-05	2.90156e-05	2.19323e-05	1.69737e-05	2.95305e-05	2.61377e-05	2.2993e-05	2.13351e-05	2.22755e-05	2.19305e-05	2.70492e-05	2.07466e-05	1.62297e-05	1.74251e-05	1.87046e-05	1.73534e-05	2.11634e-05	2.34434e-05	2.22503e-05	2.67801e-05	2.04437e-05
Tangeritin	HMDB0030539	371.111	1.8864	0.0485393	1.27998	9.0086e-08	3.5792e-07	4.34017e-07	4.1093e-07	3.71823e-07	3.6248e-08	4.33179e-07	2.7116e-07	5.0529e-07	3.06849e-07	1.98934e-07	2.51308e-07	4.87313e-07	8.40663e-07	7.75689e-07	3.02327e-07	2.16443e-07	4.95735e-07	1.71573e-07	3.52991e-07	4.93698e-07	2.92392e-07	1.63054e-06	8.59481e-07	1.09389e-06	1.08725e-06	9.00723e-07	9.31615e-07	1.14919e-06	1.03309e-06	9.54934e-07	1.16553e-06	1.03019e-06	1.06498e-06
Beta-Cortolone	HMDB0013221	365.234	1.32137	0.0494565	1.62063	5.91906e-06	1.06942e-05	9.29972e-06	1.62982e-05	1.45062e-05	1.52798e-05	1.27017e-05	7.58293e-06	1.18436e-05	7.59149e-06	7.01202e-06	1.76213e-05	2.46353e-05	1.40021e-05	1.44438e-05	1.3474e-05	1.43979e-05	1.16988e-05	1.68915e-05	1.31582e-05	2.10214e-05	7.56334e-06	1.08726e-05	1.80095e-05	9.3864e-06	7.61528e-06	6.67628e-06	1.18721e-05	1.35081e-05	1.29226e-05	9.81701e-06	9.56009e-06	5.84963e-06	7.23948e-06
LysoPC(20:3(5Z,8Z,11Z))	HMDB0010393	546.354	0.735355	0.0496171	1.12422	0.00136544	0.00148425	0.0021024	0.0014371	0.00163311	0.00136402	0.00260127	0.000720333	0.00260981	0.0013445	0.00122293	0.0013219	0.000987029	0.000797844	0.000669088	0.000874793	0.00157765	0.00122439	0.00100585	0.00190424	0.00134457	0.00189956	0.000843157	0.000995842	0.00103227	0.000881572	0.00106842	0.000958884	0.00115614	0.00109873	0.00107602	0.00139036	0.00118414	0.00102628
2,2-dichloro-1,1-ethanediol	HMDB0062193	130.967	1.16817	0.0498405	1.0071	5.81571e-06	1.00718e-05	6.65997e-06	7.7111e-06	6.92744e-06	4.79275e-06	6.72537e-06	9.11062e-06	7.77051e-06	6.3606e-06	7.38701e-06	7.18388e-06	9.80547e-06	9.45997e-06	9.52045e-06	9.36699e-06	6.14506e-06	7.81697e-06	6.94182e-06	6.49596e-06	7.3691e-06	9.319e-06	8.17182e-06	1.06539e-05	7.9479e-06	7.04768e-06	5.53341e-06	6.91712e-06	7.20368e-06	8.29347e-06	8.07808e-06	6.14745e-06	7.60844e-06	9.43419e-06

## Sheet: Figure 2B, 2D and 2F
Figure 2B, 2D and 2F. The effect of TBT on serum metabolism.
Name	HMDB	m/z	Fold Change	P value	VIP	S-A-11	S-A-265	S-A-26	S-A-35	S-A-60	S-A-68	S-A-6	S-A-73	S-A-78	S-A-87	S-A-8	S-B-12	S-B-22	S-B-23	S-B-264	S-B-266	S-B-267	S-B-27	S-B-32	S-B-58	S-B-63	S-B-72	S-B-85	S-QC-10	S-QC-1	S-QC-2	S-QC-3	S-QC-4	S-QC-5	S-QC-6	S-QC-7	S-QC-8	S-QC-9
(+)-Calycanthine	HMDB0029561	345.208	2.0187	0.00875878	2.11907	4.02095e-06	1.01885e-05	9.84723e-06	8.56477e-06	9.28915e-06	9.86479e-06	2.02079e-05	4.76789e-06	9.51681e-06	8.23342e-06	2.05509e-05	3.49807e-05	2.39351e-05	1.4766e-05	2.09125e-05	2.15434e-05	1.15558e-05	2.57619e-05	2.38709e-05	1.6495e-05	1.03933e-05	1.72412e-05	3.19146e-05	5.24906e-06	5.36854e-06	7.27721e-06	7.08752e-06	2.21177e-06	5.95814e-06	6.39723e-06	6.37083e-06	6.55995e-06	4.633e-06
Oxalosuccinic acid	HMDB0003974	189.002	2.2291	0.0105079	2.18029	6.39621e-06	1.18528e-05	2.11006e-05	1.09609e-05	2.13912e-05	3.3168e-05	1.9985e-05	5.4554e-06	2.70734e-05	3.3903e-05	2.36319e-05	4.45372e-05	5.01151e-05	2.3453e-05	6.22834e-05	5.53517e-05	1.47781e-05	5.11297e-05	7.67349e-05	3.31927e-05	1.46315e-05	4.88326e-05	4.75879e-05	1.42937e-05	1.46847e-05	1.28725e-05	1.30735e-05	1.35953e-05	1.5087e-05	1.79702e-05	1.58148e-05	1.70077e-05	1.15045e-05
2-Amino-4-oxo-6-(1',2',3'-trihydroxypropyl)-diquinoid-7,8-dihydroxypterin	HMDB0012144	288.092	1.52071	0.016308	1.64301	3.20502e-06	2.90641e-06	1.95337e-06	4.22381e-06	1.92817e-06	2.50484e-06	3.85493e-06	2.28489e-06	1.59961e-06	2.19477e-06	2.12793e-06	2.24924e-06	5.37993e-06	5.01964e-06	4.66398e-06	4.35899e-06	4.69825e-06	4.59072e-06	4.81776e-06	4.252e-06	1.63731e-06	2.75816e-06	3.32515e-06	1.79294e-06	2.76521e-06	2.68522e-06	3.21195e-06	1.82576e-06	2.01355e-06	1.91451e-06	1.5907e-06	3.09751e-06	2.47363e-06
Glaucarubin	HMDB0035626	497.24	3.3148	0.0192926	1.14915	2.84947e-06	7.96624e-07	1.00824e-06	1.25796e-06	8.38694e-07	1.34157e-06	3.33388e-06	1.03117e-06	4.47977e-06	2.22918e-06	5.18422e-06	5.27131e-06	1.26165e-05	2.94836e-06	6.33546e-06	2.78192e-06	2.42547e-06	5.26443e-06	5.05814e-06	9.16326e-06	2.98101e-06	1.52294e-05	1.79808e-05	1.38165e-05	1.29679e-05	1.12074e-05	1.17924e-05	1.26459e-05	1.25466e-05	1.29039e-05	1.41401e-05	1.39741e-05	1.33904e-05
2-Oxo-4-methylthiobutanoic acid	HMDB0001553	147.013	1.48503	0.0195282	1.24075	0.00132981	0.00102772	0.00156362	0.00124084	0.00208233	0.00129815	0.00159814	0.00166838	0.00125164	0.00162036	0.00127229	0.00268905	0.00287064	0.00138192	0.00220107	0.00177918	0.00147645	0.0024029	0.00145774	0.00338361	0.00146088	0.00306202	0.00167947	0.00151402	0.00165027	0.00146554	0.00135596	0.00149916	0.00146458	0.00229837	0.00170348	0.00167171	0.00124431
Imazamethabenz-methyl	HMDB0034913	289.157	0.787617	0.0197308	1.59446	9.17562e-07	8.11729e-07	8.9046e-07	6.5306e-07	8.39963e-07	6.08985e-07	6.48171e-07	5.80791e-07	1.03327e-06	7.27863e-07	7.30717e-07	6.88718e-07	6.03599e-07	6.00679e-07	7.27628e-07	6.69314e-07	5.43402e-07	5.71646e-07	3.84276e-07	7.98852e-07	5.98191e-07	4.7765e-07	5.90055e-07	7.56611e-07	2.09496e-06	2.0773e-06	1.6801e-06	2.321e-06	2.02458e-06	1.76605e-06	2.21936e-06	1.33015e-06	2.79157e-06
7-Dehydrodesmosterol	HMDB0003896	383.33	0.705492	0.0201422	1.38268	3.59202e-06	5.796e-06	3.29696e-06	4.00651e-06	3.62483e-06	2.83568e-06	3.26897e-06	5.08808e-06	3.09521e-06	2.30691e-06	3.39387e-06	1.0223e-06	2.8533e-06	2.35531e-06	3.15767e-06	2.50839e-06	2.22021e-06	3.27996e-06	3.27074e-06	2.31018e-06	2.90993e-06	2.0749e-06	3.057e-06	3.89882e-06	5.63987e-06	3.31855e-06	2.49827e-06	3.1214e-06	3.86378e-06	3.51209e-06	3.6266e-06	2.94816e-06	3.2305e-06
4-Hydroxy-D4-neuroprostane	HMDB0012777	377.229	0.568129	0.0208393	1.37236	7.43372e-06	1.12542e-05	9.92277e-06	8.89829e-06	2.96833e-06	6.32362e-06	4.15453e-06	8.29131e-06	1.08221e-05	6.01396e-06	4.02983e-06	3.99195e-06	9.75615e-07	4.50828e-06	5.28312e-06	8.98967e-06	5.33914e-06	6.07818e-06	3.5316e-06	3.06052e-06	3.70351e-06	2.88249e-06	1.30793e-06	5.51411e-06	8.42406e-06	5.34223e-06	4.27953e-06	6.25963e-06	4.27837e-06	6.18687e-06	4.78155e-06	4.88529e-06	5.4591e-06
Vaccenic acid	HMDB0003231	283.264	1.63923	0.0224288	1.25964	2.98028e-06	3.19034e-06	2.9048e-06	2.77283e-06	2.85259e-06	2.6745e-06	3.47566e-06	2.09119e-06	2.30583e-06	2.62045e-06	2.5721e-06	6.09553e-06	2.40844e-06	3.27002e-06	7.5874e-06	6.56816e-06	4.09778e-06	5.77763e-06	2.74122e-06	2.82307e-06	2.72284e-06	7.16463e-06	3.17865e-06	2.90175e-06	3.13822e-06	2.80984e-06	3.75195e-06	3.38357e-06	3.10868e-06	2.46302e-06	3.06179e-06	2.95748e-06	3.70611e-06
LysoPC(P-16:0)	HMDB0010407	480.345	0.836445	0.0245634	1.24245	3.31991e-05	2.54056e-05	3.28914e-05	3.46222e-05	2.56287e-05	3.83656e-05	3.06135e-05	3.58704e-05	2.87491e-05	2.32627e-05	3.16559e-05	2.68808e-05	2.00126e-05	2.71589e-05	2.42234e-05	2.3138e-05	2.88801e-05	2.46651e-05	2.81044e-05	3.32969e-05	2.85275e-05	1.99653e-05	2.56331e-05	2.19633e-05	3.08845e-05	2.37035e-05	2.37877e-05	2.72154e-05	2.50771e-05	2.97285e-05	2.75318e-05	3.51346e-05	3.45931e-05
Capsidiol	HMDB0002352	237.184	0.523421	0.0253301	1.26783	7.46199e-06	3.78436e-06	8.6254e-06	5.15677e-06	6.85803e-07	5.77328e-06	3.33496e-06	4.65932e-06	3.05869e-06	4.55726e-06	8.09453e-06	2.31804e-06	1.34e-06	5.39144e-06	4.29656e-06	3.41863e-06	3.40012e-06	4.85709e-06	6.49337e-07	1.87859e-06	7.74095e-07	1.3553e-06	1.83591e-06	2.29445e-06	4.96617e-06	2.69805e-06	3.46432e-06	2.47431e-06	3.8101e-06	1.7173e-06	2.87008e-06	3.09726e-06	3.77265e-06
Tartaric acid	HMDB0000956	149.009	1.61413	0.0258524	1.40088	9.953e-05	0.000109864	0.000156148	9.45727e-05	0.000138264	0.000171078	0.000189154	9.2457e-05	0.000154123	0.000192004	0.000193473	0.00012401	0.000147342	0.000164063	0.000352406	0.00019775	0.000343486	0.00015389	0.000140276	0.000153645	0.000363193	0.000312505	0.000348394	0.000204209	0.000161291	0.000150409	0.000120636	0.000166505	0.000247217	0.000231314	0.000106057	0.000183459	0.000193688
Fexofenadine	HMDB0005030	502.291	0.373708	0.0260677	1.23382	5.23548e-05	0.000207713	8.80618e-05	0.000168366	4.67389e-05	0.000146905	0.000113603	8.28118e-05	3.6983e-05	2.67613e-05	3.07199e-05	2.91114e-05	2.76293e-05	2.22749e-05	3.24944e-05	2.53542e-05	4.01274e-05	0.000105458	2.07497e-05	2.4174e-05	2.84179e-05	2.46551e-05	2.76497e-05	4.27757e-05	5.41285e-05	4.44756e-05	3.67892e-05	5.58536e-05	2.72675e-05	2.2231e-05	4.32881e-05	3.88054e-05	4.2445e-05
Nitroprusside	HMDB0014470	218.97	2.24397	0.026904	1.49187	1.17973e-06	6.7857e-07	1.38054e-05	1.95611e-06	9.34032e-06	6.26193e-06	4.45881e-06	4.36604e-07	9.71537e-06	2.21594e-06	4.37646e-06	9.43814e-06	1.36322e-05	3.39585e-06	1.55791e-05	1.33253e-05	8.81156e-06	5.54942e-06	1.75172e-05	3.38972e-06	3.60977e-06	2.249e-05	1.64932e-05	2.21377e-05	1.46784e-05	1.24163e-05	1.3355e-05	1.63803e-05	1.4241e-05	1.76123e-05	1.90785e-05	2.16384e-05	2.23955e-05
17alpha,21-Dihydroxypregnenolone	HMDB0006762	347.223	1.40008	0.027858	1.84988	4.48529e-06	9.62272e-06	1.31733e-05	7.33379e-06	1.11048e-05	1.23434e-05	1.74537e-05	1.3513e-05	1.21448e-05	7.76422e-06	1.33879e-05	1.54076e-05	1.16893e-05	1.72772e-05	1.87758e-05	2.07591e-05	1.11047e-05	1.71353e-05	1.79046e-05	1.21319e-05	7.59085e-06	1.44084e-05	2.26523e-05	6.08208e-06	6.57496e-06	5.91261e-06	5.62856e-06	6.14787e-06	6.57658e-06	6.84691e-06	7.59444e-06	1.11139e-05	6.20879e-06
Niacinamide	HMDB0001406	123.056	0.71474	0.0291717	1.17324	0.000842809	0.00118997	0.00101662	0.00187292	0.000885262	0.00107637	0.000663294	0.00109675	0.000792417	0.00085975	0.00100551	0.000757352	0.0007963	0.000753868	0.000698132	0.000993006	0.000546085	0.000682447	0.000566252	0.000718467	0.000455384	0.000932742	0.000912063	0.000878461	0.000776342	0.000862581	0.000685649	0.000761934	0.000778068	0.000826445	0.000870727	0.00106958	0.000889449
Calcidiol	HMDB0003550	401.345	0.816023	0.0330207	1.50582	0.000413294	0.000449293	0.000427387	0.000548351	0.000463513	0.000345766	0.000474645	0.000476058	0.00036404	0.00033132	0.000341824	0.000263351	0.000277191	0.000322271	0.000305432	0.000473599	0.000440095	0.000441554	0.000273946	0.000347679	0.000285798	0.000284739	0.000410893	0.000400332	0.000437966	0.000347055	0.000383693	0.000437994	0.000409184	0.000421515	0.000416951	0.000418877	0.000435378
Crustecdysone	HMDB0030180	479.299	0.468701	0.0330207	1.38504	2.33495e-05	8.56441e-05	4.42658e-05	7.7322e-05	2.54802e-05	2.83607e-05	2.63089e-05	4.58538e-05	1.99371e-05	1.85592e-05	1.89644e-05	1.61542e-05	1.59665e-05	2.24892e-05	1.7302e-05	2.10223e-05	2.3957e-05	1.3699e-05	1.37152e-05	1.45011e-05	1.76985e-05	1.72342e-05	1.79666e-05	1.98991e-05	3.14717e-05	2.80654e-05	1.92749e-05	2.55535e-05	2.48733e-05	2.34443e-05	2.44249e-05	2.40175e-05	1.70557e-05
Carmustine	HMDB0014407	212.002	1.95701	0.0331094	1.05713	0.000125561	0.000225194	0.000406412	0.000382264	0.000244357	0.000341663	0.000316713	0.000151252	0.000317203	0.000744068	0.000220451	0.000307195	0.000457935	0.000376373	0.000755892	0.00101923	0.000506683	0.000530311	0.000974225	0.000322601	0.00021065	0.00143231	0.000525736	0.000456582	0.00043728	0.000357995	0.000403427	0.000357487	0.000443079	0.000473675	0.000672165	0.000695713	0.00040007
Dihydrocortisol	HMDB0003259	363.219	1.81914	0.0354489	1.93502	6.21617e-07	2.54162e-06	3.618e-06	2.34178e-06	2.66782e-06	3.6489e-06	3.90208e-06	1.51281e-06	1.21466e-06	2.91906e-06	5.44872e-06	8.35958e-06	5.17217e-06	3.45571e-06	6.01559e-06	3.33788e-06	1.5298e-06	7.69507e-06	4.48498e-06	4.59652e-06	1.27386e-06	3.95908e-06	1.05227e-05	1.92805e-06	2.129e-06	1.59154e-06	1.41271e-06	1.7541e-06	1.99868e-06	2.4463e-06	2.3473e-06	2.35282e-06	1.68963e-06
L-Ribulose	HMDB0003371	149.045	1.22035	0.0356176	1.44239	1.45888e-05	1.71504e-05	2.26355e-05	1.97739e-05	2.23893e-05	2.13234e-05	1.29184e-05	1.38393e-05	1.47741e-05	1.76048e-05	1.51707e-05	2.20955e-05	1.79914e-05	1.86733e-05	2.86456e-05	2.22622e-05	2.04663e-05	2.4525e-05	2.75976e-05	1.75474e-05	1.63833e-05	2.04784e-05	1.9167e-05	2.31977e-05	2.45481e-05	2.01831e-05	2.13988e-05	2.56726e-05	2.27118e-05	2.92033e-05	2.6787e-05	2.79379e-05	1.86098e-05
Eicosapentaenoic acid	HMDB0001999	303.231	0.585184	0.0375477	1.25339	0.000978614	0.000582878	0.00129294	0.0008134	5.49013e-05	0.00120041	0.000423753	0.000893762	0.000483676	0.000709998	0.00128251	0.00034914	0.000237251	0.000762678	0.000779074	0.000590983	0.000450216	0.000633337	0.000397844	0.000409276	0.000473813	0.000240994	0.000240075	0.000490307	0.000564485	0.000396905	0.000460983	0.000503055	0.000482038	0.000445769	0.000598601	0.000576969	0.000449623
N1-Acetylspermidine	HMDB0001276	188.176	1.80483	0.03912	1.40706	3.32686e-06	2.17241e-06	2.81958e-06	5.24674e-06	5.99584e-06	1.38639e-06	1.0855e-05	2.8958e-06	4.52397e-06	5.67512e-06	5.65878e-06	5.00415e-06	8.79427e-06	4.50493e-06	7.39675e-06	4.04955e-06	7.27701e-06	8.5772e-06	9.04649e-06	7.64878e-06	5.8338e-06	1.01448e-05	2.12631e-05	7.27585e-06	7.5829e-06	7.15865e-06	6.913e-06	7.73656e-06	5.92371e-06	7.47466e-06	8.47553e-06	8.74312e-06	7.92766e-06
Metocurine	HMDB0015429	649.327	0.791129	0.0395799	1.27897	1.1014e-05	6.70425e-06	1.0794e-05	1.04239e-05	7.6304e-06	1.29704e-05	6.48112e-06	7.51417e-06	8.75153e-06	9.60936e-06	8.3516e-06	4.9951e-06	6.97539e-06	6.95965e-06	7.35739e-06	7.10827e-06	4.88766e-06	8.18371e-06	6.32217e-06	5.1305e-06	8.73119e-06	9.79059e-06	1.00746e-05	8.52306e-06	6.59251e-06	9.92085e-06	8.77726e-06	7.97299e-06	1.51244e-05	8.04745e-06	9.83929e-06	9.50004e-06	8.34009e-06
Drostanolone	HMDB0014996	305.247	0.74826	0.0399769	1.08003	0.000134972	0.000206606	0.000153117	0.000218498	0.000177204	0.000154581	9.78528e-05	0.000173482	0.000119941	9.95368e-05	7.46121e-05	0.000114089	0.00010162	0.000102065	0.000117576	7.63657e-05	0.000134652	0.000113863	0.000124432	8.42456e-05	0.000122594	0.000123489	9.95547e-05	0.000171584	0.000166747	8.94524e-05	0.000114647	0.000112164	0.000119179	0.000104669	0.000115924	0.000155395	0.000140462
L-Palmitoylcarnitine	HMDB0000222	400.342	0.821887	0.0399769	1.50472	0.00162778	0.00170995	0.00164417	0.00211083	0.00180494	0.00139808	0.00192832	0.00176558	0.00140209	0.00130353	0.00129155	0.00105705	0.00102985	0.00126459	0.00108118	0.00183488	0.00178121	0.00182646	0.00102883	0.00134555	0.00120621	0.00111089	0.00156035	0.00156913	0.00178658	0.0014191	0.00156768	0.00178022	0.00167136	0.00160871	0.00164706	0.00159432	0.00167336
Pravastatin	HMDB0005022	425.251	0.625858	0.0411741	1.24168	2.57408e-06	5.0559e-06	2.65827e-06	3.02946e-06	3.66454e-06	2.53301e-06	1.82188e-06	2.99684e-06	1.23293e-06	1.14523e-06	1.83082e-06	3.13065e-06	1.16818e-06	1.85276e-06	1.6144e-06	1.44699e-06	1.62236e-06	2.32824e-06	2.71069e-06	9.99451e-07	1.19564e-06	1.05256e-06	3.6591e-07	1.84538e-06	2.07369e-06	1.65564e-06	1.22606e-06	1.85685e-06	1.96391e-06	1.90691e-06	1.74484e-06	1.85048e-06	1.72097e-06
Phosphoroselenoic acid	HMDB0003840	160.892	1.21815	0.0413963	1.25621	3.13985e-06	3.19813e-06	3.5736e-06	2.35275e-06	1.95684e-06	3.53175e-06	4.52265e-06	2.72615e-06	3.27913e-06	1.82603e-06	3.52617e-06	3.76705e-06	3.26033e-06	2.84038e-06	3.88219e-06	4.25493e-06	3.98356e-06	3.89722e-06	3.27208e-06	3.60301e-06	4.64959e-06	3.19225e-06	4.0922e-06	4.20627e-06	4.90635e-06	3.60247e-06	2.3479e-06	2.47894e-06	4.87622e-06	4.33194e-06	3.80974e-06	2.49569e-06	3.21707e-06
Oxoglutaric acid	HMDB0000208	145.013	0.405526	0.041471	1.41192	6.51837e-06	3.92728e-06	8.11309e-06	5.77931e-06	1.21927e-06	1.05286e-05	2.0525e-05	8.30119e-06	1.19873e-05	2.71807e-05	1.0906e-05	1.83279e-06	7.59969e-07	1.03786e-05	1.93421e-06	1.22779e-05	1.1269e-05	4.61302e-06	1.06199e-06	0	5.33268e-06	0	1.4088e-06	8.17716e-06	1.00131e-05	5.77633e-06	7.05398e-06	7.56556e-06	1.05155e-05	1.03497e-05	9.95379e-06	9.29568e-06	6.00754e-06
Glutathione	HMDB0000125	308.092	0.530624	0.0435869	1.34685	7.33916e-06	1.07625e-05	4.20383e-06	8.46561e-06	8.8896e-06	5.97344e-08	1.33942e-05	5.69824e-06	9.78109e-06	1.73755e-05	4.45177e-06	6.2488e-07	5.6055e-06	7.94716e-06	1.96361e-06	5.9591e-06	5.84886e-06	4.85064e-07	1.84567e-07	8.18949e-06	5.31088e-06	3.43285e-06	6.78949e-06	1.12908e-05	1.43027e-05	1.16798e-05	1.28419e-05	1.30189e-05	1.39974e-05	1.25215e-05	1.16715e-05	1.31358e-05	1.06608e-05
Prostaglandin E1	HMDB0001442	353.234	0.715538	0.0442039	1.27342	1.53805e-05	1.87048e-05	1.83427e-05	1.6317e-05	8.54299e-06	1.77309e-05	9.76249e-06	1.66802e-05	7.43131e-06	1.12874e-05	9.51053e-06	1.03693e-05	4.81638e-06	1.45313e-05	1.21103e-05	1.55611e-05	1.27571e-05	1.32947e-05	7.6445e-06	6.80735e-06	6.87811e-06	5.45918e-06	6.61726e-06	8.36829e-06	1.05381e-05	8.09114e-06	9.8803e-06	7.9726e-06	1.10154e-05	1.18631e-05	1.02081e-05	1.16318e-05	6.37099e-06
Eplerenone	HMDB0014838	415.211	0.899556	0.0452968	1.07006	0.000295822	0.0002574	0.00027273	0.000278204	0.00027568	0.000235748	0.000269606	0.000278011	0.000292594	0.000264199	0.000291616	0.000290136	0.000230482	0.000273778	0.000295892	0.000242966	0.000186124	0.000239162	0.000224405	0.000199867	0.000226789	0.000242077	0.000303716	0.00034256	0.000406114	0.000297556	0.000152073	0.000333786	0.000302394	0.000316262	0.000425925	0.000308152	0.000286164
L-2-Aminoadipate adenylate	HMDB0006941	489.111	1.51407	0.0460326	1.12834	6.7983e-07	3.0384e-07	4.77175e-07	1.35319e-07	3.30862e-07	2.34389e-07	6.6391e-07	1.07568e-07	8.75214e-07	8.38535e-07	9.10142e-07	9.60515e-07	7.79661e-07	1.05873e-06	8.66032e-07	1.16411e-06	5.5787e-07	5.05849e-07	4.66157e-07	7.9095e-07	5.52126e-07	4.5422e-07	1.02198e-06	5.00519e-07	3.86216e-07	4.68523e-07	3.86637e-07	4.57969e-07	4.97039e-07	5.69544e-07	6.65757e-07	5.30241e-07	3.43795e-07
Cadmium	HMDB0003638	112.896	0.576192	0.0463813	1.29235	1.71232e-05	5.62265e-05	2.00582e-05	4.28556e-05	4.41546e-05	1.11933e-05	2.01599e-05	2.78942e-05	1.40708e-05	1.50308e-05	1.4583e-05	1.57477e-05	1.5379e-05	1.56326e-05	1.86653e-05	1.364e-05	1.37367e-05	1.68505e-05	1.16589e-05	1.62717e-05	1.05739e-05	1.5796e-05	1.41543e-05	1.76328e-05	1.7323e-05	1.34743e-05	1.58244e-05	1.66044e-05	1.48569e-05	1.57272e-05	1.81285e-05	1.5949e-05	1.62414e-05
Nalidixic Acid	HMDB0014917	231.078	1.6599	0.0473197	1.07294	1.31112e-06	7.54304e-07	1.42911e-06	1.7097e-06	8.88359e-07	3.12571e-07	1.45301e-06	5.59205e-07	2.93127e-06	1.22548e-06	1.70853e-06	1.34398e-06	2.93921e-06	4.13057e-06	2.05165e-06	3.31424e-06	1.7811e-06	2.14189e-06	1.27262e-06	2.81542e-06	6.21216e-07	4.52095e-07	2.9991e-06	1.96405e-06	2.82558e-06	1.08405e-06	1.44164e-06	1.19092e-06	1.51167e-06	1.95766e-06	1.78688e-06	2.2469e-06	1.52237e-06
(R)-Methysticin	HMDB0033590	273.076	1.26498	0.0475848	1.18576	4.47034e-06	2.8936e-06	4.03413e-06	2.64247e-06	3.54784e-06	3.31801e-06	4.06113e-06	1.99364e-06	6.09331e-06	5.08401e-06	5.44645e-06	5.43088e-06	4.89954e-06	5.81585e-06	5.58472e-06	6.45293e-06	4.13151e-06	5.58384e-06	3.81353e-06	5.0346e-06	3.41072e-06	3.72485e-06	6.2633e-06	4.73333e-06	3.2931e-06	3.2288e-06	3.13165e-06	3.69783e-06	4.05371e-06	5.20127e-06	2.72447e-06	5.28167e-06	3.82126e-06
Midazolam	HMDB0014821	324.071	1.27762	0.0475848	1.07048	7.47359e-07	7.52564e-07	1.20021e-06	1.47568e-06	1.14402e-06	9.21708e-07	1.02963e-06	8.75616e-07	9.39445e-07	9.20108e-07	9.36737e-07	8.83836e-07	1.40334e-06	4.4895e-07	1.57799e-06	1.98111e-06	1.16698e-06	1.43602e-06	1.30312e-06	1.17874e-06	1.11506e-06	1.36005e-06	1.39697e-06	1.05528e-06	1.22739e-06	9.4242e-07	1.1199e-06	5.75958e-07	1.0556e-06	1.42822e-06	1.18834e-06	9.81975e-07	6.7333e-07
Lipoxin B4	HMDB0005082	351.218	0.585833	0.0475848	1.22196	6.04484e-06	1.10785e-05	1.00309e-05	3.57846e-06	3.52342e-06	1.10906e-05	2.61945e-06	4.2467e-06	4.00739e-06	4.87636e-06	9.61231e-06	2.69761e-06	1.76359e-06	7.00778e-06	6.00299e-06	2.79954e-06	1.8598e-06	5.95101e-06	3.1376e-06	2.43241e-06	8.24774e-06	1.50267e-06	1.78661e-06	2.63252e-06	2.71209e-06	3.25129e-06	3.35214e-06	3.25781e-06	3.4092e-06	3.59215e-06	3.81644e-06	4.47485e-06	2.98519e-06
Punicic acid	HMDB0030963	279.231	0.60621	0.0493853	1.18777	4.85536e-05	4.96536e-05	6.31444e-05	4.12572e-05	1.90978e-05	3.29124e-05	1.85973e-05	5.85567e-05	1.85594e-05	1.27064e-05	1.88456e-05	2.39032e-05	6.87973e-06	1.97282e-05	3.50476e-05	1.78807e-05	3.46287e-05	3.44103e-05	2.59081e-05	1.1545e-05	2.40265e-05	9.22603e-06	9.36377e-06	4.24712e-05	4.37612e-05	3.96173e-05	4.25124e-05	3.9566e-05	3.04797e-05	2.7583e-05	4.15597e-05	2.88427e-05	5.0722e-05
Ginkgoic acid	HMDB0033897	345.244	0.542165	0.0493853	1.33168	3.52732e-05	3.04976e-05	8.25593e-05	2.90553e-05	3.71793e-06	7.22497e-05	2.06365e-05	6.92444e-05	2.46469e-05	1.91911e-05	4.23979e-05	2.38495e-05	1.13044e-05	3.15951e-05	3.02274e-05	2.88249e-05	1.66352e-05	3.73973e-05	1.64139e-05	1.79224e-05	2.14802e-05	8.70059e-06	9.66029e-06	2.02403e-05	2.29811e-05	1.48464e-05	1.71442e-05	2.10065e-05	2.12013e-05	2.22936e-05	2.12772e-05	2.3226e-05	1.6217e-05
Lincomycin	HMDB0015564	405.21	0.61026	0.0493853	1.25255	1.00786e-05	6.53723e-06	1.55119e-05	1.02226e-05	2.58878e-07	1.8642e-05	5.49608e-06	1.05883e-05	6.774e-06	9.57429e-06	1.68227e-05	5.41399e-06	2.81284e-06	9.24499e-06	9.72072e-06	8.83559e-06	5.45243e-06	8.84686e-06	4.69863e-06	5.63102e-06	6.31178e-06	3.21804e-06	3.38154e-06	5.72723e-06	7.13187e-06	4.77801e-06	4.67944e-06	5.57734e-06	6.10562e-06	5.92473e-06	5.99883e-06	7.42029e-06	4.83909e-06
all-trans-Retinoic acid	HMDB0001852	301.216	0.598967	0.0497424	1.33421	4.82502e-05	2.26055e-05	3.98018e-05	1.80888e-05	3.99477e-06	4.74429e-05	2.97673e-05	6.91262e-05	2.66801e-05	1.70678e-05	3.97051e-05	1.47522e-05	8.71411e-06	3.02837e-05	2.91734e-05	1.43087e-05	1.86843e-05	3.64678e-05	2.07234e-05	1.51665e-05	2.87892e-05	8.13254e-06	1.1688e-05	2.37321e-05	2.33674e-05	1.95456e-05	1.9233e-05	2.25488e-05	1.99501e-05	2.25482e-05	2.25227e-05	2.04291e-05	2.23829e-05
Prostaglandin A2	HMDB0002752	335.22	0.611398	0.0497424	1.10483	1.4196e-05	1.67284e-05	1.89937e-05	8.74853e-06	7.64368e-06	8.3489e-06	3.89387e-06	1.26418e-05	4.13475e-06	5.00557e-06	5.66537e-06	6.06748e-06	3.36704e-06	1.05362e-05	7.32845e-06	8.57644e-06	7.60029e-06	7.81879e-06	5.04317e-06	3.60452e-06	4.29326e-06	3.88939e-06	2.57525e-06	7.64411e-06	5.12267e-06	5.62178e-06	6.90714e-06	7.28146e-06	7.61037e-06	7.09224e-06	6.383e-06	5.26653e-06	7.38093e-06
Medrysone	HMDB0014398	343.228	0.591273	0.0497424	1.32632	9.31629e-05	6.52485e-05	0.000172383	7.87809e-05	6.13381e-06	0.000135653	5.30911e-05	0.000126404	5.78763e-05	3.48669e-05	9.99095e-05	4.73892e-05	3.09461e-05	7.1603e-05	7.75789e-05	5.63176e-05	3.38715e-05	8.34542e-05	3.24567e-05	4.01314e-05	6.88675e-05	3.2887e-05	2.01841e-05	5.07515e-05	5.05369e-05	4.48382e-05	4.30631e-05	4.84652e-05	5.41681e-05	4.88607e-05	5.45401e-05	5.18651e-05	3.80102e-05
Deoxyuridine	HMDB0000012	227.067	1.50032	0.0497424	1.15708	4.7278e-06	3.75783e-06	7.64179e-06	4.47669e-06	3.65074e-06	1.06151e-05	6.09553e-06	3.31465e-06	5.1394e-06	5.48463e-06	5.54114e-06	6.4468e-06	6.79981e-06	6.65296e-06	1.71062e-05	8.59931e-06	1.4397e-05	5.59773e-06	6.73662e-06	6.28705e-06	8.30305e-06	2.80291e-06	9.20232e-06	4.67571e-06	5.75624e-06	4.48435e-06	7.509e-06	6.38153e-06	5.51139e-06	3.1599e-06	5.18665e-06	5.06457e-06	4.29294e-06
5,6-Epoxy-8,11,14-eicosatrienoic acid	HMDB0002190	319.229	0.638917	0.049811	1.24511	0.00123236	0.000739543	0.00177787	0.00105556	7.98771e-05	0.00195794	0.000658911	0.00132067	0.000916808	0.00106402	0.0020074	0.000604237	0.000398743	0.00112157	0.00113395	0.00113113	0.000697476	0.000919951	0.000583016	0.000663673	0.000900741	0.000333872	0.000440866	0.000680011	0.000766899	0.000692532	0.000580987	0.000636006	0.000746707	0.000810162	0.000869063	0.000846407	0.000625363

## Sheet: Figure 2H
Figure 2H. The western blotting of PERK and CHOP in ER stress.
Gray value ratio			Relative expression
	Control	TBT		Control	TBT
PERK/GAPDH	0.610613	1.01731	PERK/GAPDH	0.915981	1.52607
	0.799553	0.973206		1.19941	1.36086
	0.589699	0.90718		0.884609	1.45991
CHOP/GAPDH	0.511597	1.02018	CHOP/GAPDH	0.868847	1.73258
	0.785224	1.10707		1.33355	1.88015
	0.469648	1.41635		0.797605	2.40539

## Sheet: Figure 2I-K
Figure 2I-K. The concerntration of metal elements in serum.
	44Ca (KED)	57Fe (KED)	63Cu (KED)
Control	16.9427	20.3136	5.57068
	15.6699	74.3255	6.22516
	17.8632	34.4546	6.94608
	17.4852	86.6896	6.79892
	20.2838	37.7641	6.83076
	18.279	31.5857	5.74674
	20.2766	69.606	5.98458
	20.3395	31.0127	7.17215
	20.0967	81.6928	6.71735
TBT	20.2981	36.35	7.31685
	20.0523	31.634	7.57325
	20.6376	27.2629	9.12072
	20.8004	34.4636	7.8132
	22.0238	23.1247	7.07374
	19.1284	31.2006	7.45942
	22.2396	31.3095	9.39843
	20.0354	33.462	7.05679
VIP	1.26141	1.05531	1.50148
P value	0.0103728	0.0389341	0.00150428
unit:μg/ml

## Sheet: Figure 3C
Figure 3C. The abundance of gut microbita at genus level.
Domain	Kingdom	Phylum	Class	Order	Family	Genus	Species	OTU	Control						TBT
d__Bacteria	k__norank	p__Firmicutes	c__Clostridia	o__Clostridiales	f__Lachnospiraceae	g__unclassified_f__Lachnospiraceae	s__unclassified_f__Lachnospiraceae	OTU681	0	2	145	18	15	191	110	73	30	73	4	66
d__Bacteria	k__norank	p__Firmicutes	c__Clostridia	o__Clostridiales	f__Ruminococcaceae	g__Ruminococcus_1	s__uncultured_organism_g__Ruminococcus_1	OTU262	0	0	0	0	0	0	0	0	0	156	0	0
d__Bacteria	k__norank	p__Firmicutes	c__Clostridia	o__Clostridiales	f__Lachnospiraceae	g__Marvinbryantia	s__uncultured_bacterium_g__Marvinbryantia	OTU431	0	6	2	1	0	0	0	0	0	0	2	0
d__Bacteria	k__norank	p__Firmicutes	c__Clostridia	o__Clostridiales	f__Lachnospiraceae	g__unclassified_f__Lachnospiraceae	s__unclassified_f__Lachnospiraceae	OTU688	0	0	0	0	0	0	0	0	0	1	0	0
d__Bacteria	k__norank	p__Firmicutes	c__Clostridia	o__Clostridiales	f__Lachnospiraceae	g__norank_f__Lachnospiraceae	s__unclassified_g__norank_f__Lachnospiraceae	OTU655	2	1	0	0	0	2	15	0	2	10	2	0
d__Bacteria	k__norank	p__Bacteroidetes	c__Bacteroidia	o__Bacteroidales	f__Bacteroidaceae	g__Bacteroides	s__unclassified_g__Bacteroides	OTU200	1	7	11	0	0	3	19	28	5	8	0	1
d__Bacteria	k__norank	p__Firmicutes	c__Clostridia	o__Clostridiales	f__Lachnospiraceae	g__unclassified_f__Lachnospiraceae	s__unclassified_f__Lachnospiraceae	OTU726	0	1	2	1	5	2	3	5	3	13	2	0
d__Bacteria	k__norank	p__Firmicutes	c__Clostridia	o__Clostridiales	f__unclassified_o__Clostridiales	g__unclassified_o__Clostridiales	s__unclassified_o__Clostridiales	OTU460	0	0	0	0	0	0	2	1	4	1	0	0
d__Bacteria	k__norank	p__Firmicutes	c__Clostridia	o__Clostridiales	f__Ruminococcaceae	g__Ruminococcaceae_UCG-014	s__unclassified_g__Ruminococcaceae_UCG-014	OTU4	0	1	1	19	0	18	6	1	6	0	0	1
d__Bacteria	k__norank	p__Firmicutes	c__Clostridia	o__Clostridiales	f__Family_XIII	g__Family_XIII_UCG-001	s__uncultured_bacterium_g__Family_XIII_UCG-001	OTU345	0	0	20	0	0	10	3	5	4	8	0	1
d__Bacteria	k__norank	p__Firmicutes	c__Clostridia	o__Clostridiales	f__Peptostreptococcaceae	g__Intestinibacter	s__uncultured_Clostridium_sp._g__Intestinibacter	OTU2	137	0	15	21	34	1	4	9	4	6	35	19
d__Bacteria	k__norank	p__Firmicutes	c__Clostridia	o__Clostridiales	f__Lachnospiraceae	g__unclassified_f__Lachnospiraceae	s__unclassified_f__Lachnospiraceae	OTU718	0	0	0	0	1	2	5	7	2	3	0	2
d__Bacteria	k__norank	p__Firmicutes	c__Clostridia	o__Clostridiales	f__Clostridiales_vadinBB60_group	g__norank_f__Clostridiales_vadinBB60_group	s__unclassified_g__norank_f__Clostridiales_vadinBB60_group	OTU644	0	10	0	0	4	7	2	5	0	8	2	0
d__Bacteria	k__norank	p__Firmicutes	c__Clostridia	o__Clostridiales	f__Lachnospiraceae	g__Lachnospiraceae_UCG-006	s__unclassified_g__Lachnospiraceae_UCG-006	OTU417	0	6	5	5	2	28	7	12	11	70	1	6
d__Bacteria	k__norank	p__Proteobacteria	c__Gammaproteobacteria	o__Enterobacteriales	f__Enterobacteriaceae	g__Enterobacter	s__unclassified_g__Enterobacter	OTU778	3	18	2	1	0	0	1	2	0	0	0	0
d__Bacteria	k__norank	p__Firmicutes	c__Clostridia	o__Clostridiales	f__Clostridiales_vadinBB60_group	g__norank_f__Clostridiales_vadinBB60_group	s__unclassified_g__norank_f__Clostridiales_vadinBB60_group	OTU138	0	0	0	2	3	1	1	0	7	0	0	2
d__Bacteria	k__norank	p__Verrucomicrobia	c__Verrucomicrobiae	o__Verrucomicrobiales	f__Verrucomicrobiaceae	g__Akkermansia	s__Akkermansia_muciniphila	OTU322	8	232	5	166	0	23	52	1769	23	32	64	11
d__Bacteria	k__norank	p__Bacteroidetes	c__Bacteroidia	o__Bacteroidales	f__Bacteroidales_S24-7_group	g__norank_f__Bacteroidales_S24-7_group	s__uncultured_bacterium_g__norank_f__Bacteroidales_S24-7_group	OTU205	2	2	3	37	0	9	6	40	14	20	0	14
d__Bacteria	k__norank	p__Tenericutes	c__Mollicutes	o__Mollicutes_RF9	f__norank_o__Mollicutes_RF9	g__norank_o__Mollicutes_RF9	s__unclassified_g__norank_o__Mollicutes_RF9	OTU173	0	1	5	0	5	2	57	0	11	0	0	3
d__Bacteria	k__norank	p__Firmicutes	c__Clostridia	o__Clostridiales	f__Ruminococcaceae	g__unclassified_f__Ruminococcaceae	s__unclassified_f__Ruminococcaceae	OTU551	0	0	0	1	1	1	1	0	8	1	0	2
d__Bacteria	k__norank	p__Firmicutes	c__Clostridia	o__Clostridiales	f__unclassified_o__Clostridiales	g__unclassified_o__Clostridiales	s__unclassified_o__Clostridiales	OTU359	0	0	3	1	0	0	0	0	1	3	0	1
d__Bacteria	k__norank	p__Firmicutes	c__Clostridia	o__Clostridiales	f__Lachnospiraceae	g__unclassified_f__Lachnospiraceae	s__unclassified_f__Lachnospiraceae	OTU721	0	0	0	0	0	0	0	3	0	4	1	0
d__Bacteria	k__norank	p__Firmicutes	c__Clostridia	o__Clostridiales	f__Lachnospiraceae	g__unclassified_f__Lachnospiraceae	s__unclassified_f__Lachnospiraceae	OTU295	0	0	9	3	0	2	3	4	7	17	0	5
d__Bacteria	k__norank	p__Deferribacteres	c__Deferribacteres	o__Deferribacterales	f__Deferribacteraceae	g__Mucispirillum	s__uncultured_bacterium_g__Mucispirillum	OTU526	0	2	25	6	1	15	1	16	2	29	0	9
d__Bacteria	k__norank	p__Firmicutes	c__Clostridia	o__Clostridiales	f__Lachnospiraceae	g__unclassified_f__Lachnospiraceae	s__unclassified_f__Lachnospiraceae	OTU626	0	0	2	0	2	0	2	0	0	62	0	1
d__Bacteria	k__norank	p__Saccharibacteria	c__Unknown_Class_p__Saccharibacteria	o__Unknown_Order_c__Unknown_Class_p__Saccharibacteria	f__Unknown_Family_o__Unknown_Order_c__Unknown_Class_p__Saccharibacteria	g__Candidatus_Saccharimonas	s__uncultured_bacterium_g__Candidatus_Saccharimonas	OTU494	2	6	37	143	22	8	12	18	8	11	22	7
d__Bacteria	k__norank	p__Firmicutes	c__Clostridia	o__Clostridiales	f__Lachnospiraceae	g__Lachnospiraceae_NK4A136_group	s__unclassified_g__Lachnospiraceae_NK4A136_group	OTU280	0	0	0	1	0	13	22	7	14	46	0	1
d__Bacteria	k__norank	p__Firmicutes	c__Clostridia	o__Clostridiales	f__Ruminococcaceae	g__Ruminococcaceae_UCG-010	s__unclassified_g__Ruminococcaceae_UCG-010	OTU64	0	0	4	1	0	4	3	5	2	0	0	1
d__Bacteria	k__norank	p__Actinobacteria	c__Actinobacteria	o__Coriobacteriales	f__Coriobacteriaceae	g__Coriobacteriaceae_UCG-002	s__uncultured_bacterium_g__Coriobacteriaceae_UCG-002	OTU53	1	3	3	1	0	1	0	1	0	1	3	1
d__Bacteria	k__norank	p__Firmicutes	c__Clostridia	o__Clostridiales	f__Ruminococcaceae	g__Anaerotruncus	s__uncultured_bacterium_g__Anaerotruncus	OTU696	0	2	6	1	1	3	14	8	9	10	3	2
d__Bacteria	k__norank	p__Firmicutes	c__Clostridia	o__Clostridiales	f__Ruminococcaceae	g__norank_f__Ruminococcaceae	s__unclassified_g__norank_f__Ruminococcaceae	OTU392	0	0	3	1	4	1	2	3	0	6	0	3
d__Bacteria	k__norank	p__Firmicutes	c__Clostridia	o__Clostridiales	f__Lachnospiraceae	g__unclassified_f__Lachnospiraceae	s__unclassified_f__Lachnospiraceae	OTU263	0	0	2	0	0	0	3	0	0	5	0	0
d__Bacteria	k__norank	p__Firmicutes	c__Clostridia	o__Clostridiales	f__Lachnospiraceae	g__unclassified_f__Lachnospiraceae	s__unclassified_f__Lachnospiraceae	OTU593	0	0	0	0	0	7	1	1	0	1	0	0
d__Bacteria	k__norank	p__Bacteroidetes	c__Bacteroidia	o__Bacteroidales	f__Bacteroidales_S24-7_group	g__norank_f__Bacteroidales_S24-7_group	s__uncultured_Bacteroidales_bacterium_g__norank_f__Bacteroidales_S24-7_group	OTU111	26	2	13	44	29	734	242	61	229	0	24	270
d__Bacteria	k__norank	p__Firmicutes	c__Erysipelotrichia	o__Erysipelotrichales	f__Erysipelotrichaceae	g__Faecalitalea	s__unclassified_g__Faecalitalea	OTU239	0	0	1	6	1	4	4	15	0	1	0	1
d__Bacteria	k__norank	p__Firmicutes	c__Clostridia	o__Clostridiales	f__Lachnospiraceae	g__unclassified_f__Lachnospiraceae	s__unclassified_f__Lachnospiraceae	OTU614	0	1	0	0	0	15	18	6	5	9	0	2
d__Bacteria	k__norank	p__Firmicutes	c__Clostridia	o__Clostridiales	f__Lachnospiraceae	g__unclassified_f__Lachnospiraceae	s__unclassified_f__Lachnospiraceae	OTU598	0	0	0	0	0	0	0	0	2	0	0	1
d__Bacteria	k__norank	p__Firmicutes	c__Clostridia	o__Clostridiales	f__Lachnospiraceae	g__unclassified_f__Lachnospiraceae	s__unclassified_f__Lachnospiraceae	OTU611	0	0	0	0	0	0	0	0	1	0	0	0
d__Bacteria	k__norank	p__Firmicutes	c__Clostridia	o__Clostridiales	f__Ruminococcaceae	g__Ruminococcaceae_UCG-013	s__unclassified_g__Ruminococcaceae_UCG-013	OTU126	0	0	0	2	1	0	0	1	0	0	0	0
d__Bacteria	k__norank	p__Firmicutes	c__Clostridia	o__Clostridiales	f__Ruminococcaceae	g__unclassified_f__Ruminococcaceae	s__unclassified_f__Ruminococcaceae	OTU292	0	0	3	0	0	0	2	0	3	2	0	0
d__Bacteria	k__norank	p__Firmicutes	c__Clostridia	o__Clostridiales	f__Lachnospiraceae	g__unclassified_f__Lachnospiraceae	s__unclassified_f__Lachnospiraceae	OTU506	0	1	9	3	1	7	4	3	4	25	1	1
d__Bacteria	k__norank	p__Firmicutes	c__Clostridia	o__Clostridiales	f__Lachnospiraceae	g__unclassified_f__Lachnospiraceae	s__unclassified_f__Lachnospiraceae	OTU505	0	1	0	1	0	1	0	0	3	0	0	0
d__Bacteria	k__norank	p__Firmicutes	c__Clostridia	o__Clostridiales	f__Lachnospiraceae	g__Lachnospiraceae_UCG-001	s__unclassified_g__Lachnospiraceae_UCG-001	OTU684	0	0	0	0	0	0	0	0	0	2	0	4
d__Bacteria	k__norank	p__Firmicutes	c__Clostridia	o__Clostridiales	f__Ruminococcaceae	g__unclassified_f__Ruminococcaceae	s__unclassified_f__Ruminococcaceae	OTU299	0	0	0	0	0	0	0	0	1	1	0	0
d__Bacteria	k__norank	p__Proteobacteria	c__Alphaproteobacteria	o__Rhodospirillales	f__Rhodospirillaceae	g__norank_f__Rhodospirillaceae	s__gut_metagenome_g__norank_f__Rhodospirillaceae	OTU190	0	0	1	1	1	0	1	2	0	0	0	0
d__Bacteria	k__norank	p__Firmicutes	c__Clostridia	o__Clostridiales	f__Lachnospiraceae	g__unclassified_f__Lachnospiraceae	s__unclassified_f__Lachnospiraceae	OTU661	0	0	0	0	0	17	3	2	3	16	0	1
d__Bacteria	k__norank	p__Firmicutes	c__Clostridia	o__Clostridiales	f__Lachnospiraceae	g__Roseburia	s__uncultured_bacterium_g__Roseburia	OTU672	0	0	0	0	0	0	0	1	0	0	0	0
d__Bacteria	k__norank	p__Firmicutes	c__Clostridia	o__Clostridiales	f__Lachnospiraceae	g__unclassified_f__Lachnospiraceae	s__unclassified_f__Lachnospiraceae	OTU665	0	2	19	4	8	63	23	16	21	44	0	4
d__Bacteria	k__norank	p__Firmicutes	c__Bacilli	o__Lactobacillales	f__Lactobacillaceae	g__Lactobacillus	s__unclassified_g__Lactobacillus	OTU634	0	0	0	1	0	0	0	1	0	0	0	0
d__Bacteria	k__norank	p__Firmicutes	c__Bacilli	o__Lactobacillales	f__unclassified_o__Lactobacillales	g__unclassified_o__Lactobacillales	s__unclassified_o__Lactobacillales	OTU589	0	0	0	0	0	0	1	0	0	0	2	0
d__Bacteria	k__norank	p__Firmicutes	c__Erysipelotrichia	o__Erysipelotrichales	f__Erysipelotrichaceae	g__Turicibacter	s__Turicibacter_sp._LA61	OTU546	19	1	16	2	13	7	0	2	0	3	43	1
d__Bacteria	k__norank	p__Firmicutes	c__Clostridia	o__Clostridiales	f__Ruminococcaceae	g__Ruminiclostridium_5	s__uncultured_bacterium_g__Ruminiclostridium_5	OTU62	0	2	31	3	2	0	0	0	7	2	0	4
d__Bacteria	k__norank	p__Firmicutes	c__Clostridia	o__Clostridiales	f__Lachnospiraceae	g__Dorea	s__uncultured_bacterium_g__Dorea	OTU403	0	6	5	1	2	15	0	1	4	5	7	3
d__Bacteria	k__norank	p__Firmicutes	c__Clostridia	o__Clostridiales	f__Ruminococcaceae	g__unclassified_f__Ruminococcaceae	s__unclassified_f__Ruminococcaceae	OTU240	0	2	13	7	9	6	9	7	9	1	0	7
d__Bacteria	k__norank	p__Firmicutes	c__Clostridia	o__Clostridiales	f__Clostridiaceae_1	g__Candidatus_Arthromitus	s__unclassified_g__Candidatus_Arthromitus	OTU469	0	0	0	0	0	0	1	1	0	0	0	0
d__Bacteria	k__norank	p__Firmicutes	c__Bacilli	o__Lactobacillales	f__Lactobacillaceae	g__Lactobacillus	s__unclassified_g__Lactobacillus	OTU354	8	45	0	0	5	0	0	0	0	3	0	33
d__Bacteria	k__norank	p__Firmicutes	c__Clostridia	o__Clostridiales	f__Lachnospiraceae	g__unclassified_f__Lachnospiraceae	s__unclassified_f__Lachnospiraceae	OTU285	0	1	2	2	0	1	1	0	1	6	2	0
d__Bacteria	k__norank	p__Firmicutes	c__Clostridia	o__Clostridiales	f__Ruminococcaceae	g__unclassified_f__Ruminococcaceae	s__unclassified_f__Ruminococcaceae	OTU249	0	0	7	9	0	0	3	3	4	0	0	14
d__Bacteria	k__norank	p__Firmicutes	c__Clostridia	o__Clostridiales	f__Family_XIII	g__[Eubacterium]_brachy_group	s__uncultured_bacterium_g__[Eubacterium]_brachy_group	OTU55	1	4	14	2	4	2	3	11	6	11	7	3
d__Bacteria	k__norank	p__Bacteroidetes	c__Bacteroidia	o__Bacteroidales	f__Prevotellaceae	g__Alloprevotella	s__uncultured_Bacteroidales_bacterium_g__Alloprevotella	OTU448	0	5	0	63	1	31	76	267	25	1	0	8
d__Bacteria	k__norank	p__Proteobacteria	c__Alphaproteobacteria	o__Caulobacterales	f__Caulobacteraceae	g__Brevundimonas	s__Brevundimonas_diminuta	OTU766	0	2	0	0	1	0	0	0	0	0	0	0
d__Bacteria	k__norank	p__Firmicutes	c__Erysipelotrichia	o__Erysipelotrichales	f__Erysipelotrichaceae	g__Erysipelatoclostridium	s__uncultured_bacterium_g__Erysipelatoclostridium	OTU424	0	0	0	0	0	0	0	0	0	0	0	0
d__Bacteria	k__norank	p__Firmicutes	c__Clostridia	o__Clostridiales	f__Clostridiales_vadinBB60_group	g__norank_f__Clostridiales_vadinBB60_group	s__unclassified_g__norank_f__Clostridiales_vadinBB60_group	OTU185	0	0	6	8	6	10	15	9	13	8	0	2
d__Bacteria	k__norank	p__Bacteroidetes	c__Bacteroidia	o__Bacteroidales	f__Bacteroidales_S24-7_group	g__norank_f__Bacteroidales_S24-7_group	s__uncultured_bacterium_g__norank_f__Bacteroidales_S24-7_group	OTU120	0	0	0	49	0	0	0	0	0	0	0	28
d__Bacteria	k__norank	p__Firmicutes	c__Clostridia	o__Clostridiales	f__Clostridiaceae_1	g__Clostridium_sensu_stricto_1	s__unclassified_g__Clostridium_sensu_stricto_1	OTU562	24	0	2	4	5	0	0	3	0	0	13	2
d__Bacteria	k__norank	p__Actinobacteria	c__Actinobacteria	o__Coriobacteriales	f__Coriobacteriaceae	g__Enterorhabdus	s__uncultured_bacterium_g__Enterorhabdus	OTU537	0	1	1	1	0	0	0	0	0	0	0	1
d__Bacteria	k__norank	p__Proteobacteria	c__Betaproteobacteria	o__Burkholderiales	f__Alcaligenaceae	g__Sutterella	s__unclassified_g__Sutterella	OTU227	1	10	3	1	1	34	27	37	15	19	1	4
d__Bacteria	k__norank	p__Bacteroidetes	c__Bacteroidia	o__Bacteroidales	f__Bacteroidaceae	g__Bacteroides	s__uncultured_bacterium_g__Bacteroides	OTU221	4	79	35	95	14	87	164	602	28	58	46	43
d__Bacteria	k__norank	p__Firmicutes	c__Negativicutes	o__Selenomonadales	f__Acidaminococcaceae	g__Phascolarctobacterium	s__uncultured_Veillonellaceae_bacterium_g__Phascolarctobacterium	OTU728	7	597	8	11	1	229	1	0	184	11	9	2
d__Bacteria	k__norank	p__Firmicutes	c__Clostridia	o__Clostridiales	f__Ruminococcaceae	g__Ruminococcus_1	s__unclassified_g__Ruminococcus_1	OTU435	0	0	0	0	0	0	0	0	0	0	0	0
d__Bacteria	k__norank	p__Firmicutes	c__Clostridia	o__Clostridiales	f__Ruminococcaceae	g__Ruminococcaceae_UCG-014	s__unclassified_g__Ruminococcaceae_UCG-014	OTU79	66	68	38	988	47	4	64	39	2	38	77	42
d__Bacteria	k__norank	p__Firmicutes	c__Clostridia	o__Clostridiales	f__Ruminococcaceae	g__unclassified_f__Ruminococcaceae	s__unclassified_f__Ruminococcaceae	OTU321	4	2	34	22	6	1	10	1	6	2	3	10
d__Bacteria	k__norank	p__Firmicutes	c__Clostridia	o__Clostridiales	f__Ruminococcaceae	g__unclassified_f__Ruminococcaceae	s__unclassified_f__Ruminococcaceae	OTU324	0	1	38	0	0	37	5	31	21	49	2	7
d__Bacteria	k__norank	p__Bacteroidetes	c__Bacteroidia	o__Bacteroidales	f__Bacteroidales_S24-7_group	g__norank_f__Bacteroidales_S24-7_group	s__unclassified_g__norank_f__Bacteroidales_S24-7_group	OTU96	0	0	1	2	0	0	10	0	0	0	2	2
d__Bacteria	k__norank	p__Actinobacteria	c__Actinobacteria	o__Coriobacteriales	f__Coriobacteriaceae	g__Parvibacter	s__uncultured_bacterium_g__Parvibacter	OTU43	2	19	18	24	34	6	3	10	2	4	18	4
d__Bacteria	k__norank	p__Firmicutes	c__Clostridia	o__Clostridiales	f__Ruminococcaceae	g__Butyricicoccus	s__unclassified_g__Butyricicoccus	OTU46	0	0	0	0	0	0	1	0	0	0	0	0
d__Bacteria	k__norank	p__Firmicutes	c__Clostridia	o__Clostridiales	f__Ruminococcaceae	g__Ruminococcaceae_UCG-013	s__uncultured_organism_g__Ruminococcaceae_UCG-013	OTU336	7	29	6	15	12	5	9	9	1	2	18	8
d__Bacteria	k__norank	p__Firmicutes	c__Clostridia	o__Clostridiales	f__Lachnospiraceae	g__unclassified_f__Lachnospiraceae	s__unclassified_f__Lachnospiraceae	OTU288	0	0	1	0	0	1	21	2	6	4	0	0
d__Bacteria	k__norank	p__Firmicutes	c__Clostridia	o__Clostridiales	f__Ruminococcaceae	g__[Eubacterium]_coprostanoligenes_group	s__unclassified_g__[Eubacterium]_coprostanoligenes_group	OTU281	1	4	4	3	6	7	29	6	8	4	9	3
d__Bacteria	k__norank	p__Bacteroidetes	c__Bacteroidia	o__Bacteroidales	f__Bacteroidales_S24-7_group	g__norank_f__Bacteroidales_S24-7_group	s__unclassified_g__norank_f__Bacteroidales_S24-7_group	OTU472	0	59	0	0	0	0	2	0	4	0	0	0
d__Bacteria	k__norank	p__Firmicutes	c__Clostridia	o__Clostridiales	f__Christensenellaceae	g__unclassified_f__Christensenellaceae	s__unclassified_f__Christensenellaceae	OTU59	0	0	2	0	0	1	0	1	0	0	0	0
d__Bacteria	k__norank	p__Firmicutes	c__Clostridia	o__Clostridiales	f__Ruminococcaceae	g__Ruminococcaceae_NK4A214_group	s__uncultured_bacterium_g__Ruminococcaceae_NK4A214_group	OTU333	1	4	0	13	11	18	19	39	20	7	14	12
d__Bacteria	k__norank	p__Firmicutes	c__Clostridia	o__Clostridiales	f__Lachnospiraceae	g__Lachnoclostridium	s__unclassified_g__Lachnoclostridium	OTU272	2	18	11	7	7	24	22	11	22	69	9	13
d__Bacteria	k__norank	p__Firmicutes	c__Clostridia	o__Clostridiales	f__Ruminococcaceae	g__Ruminococcus_1	s__unclassified_g__Ruminococcus_1	OTU596	8	6	0	0	0	24	37	0	75	0	1	23
d__Bacteria	k__norank	p__Firmicutes	c__Clostridia	o__Clostridiales	f__Ruminococcaceae	g__Ruminococcaceae_UCG-009	s__unclassified_g__Ruminococcaceae_UCG-009	OTU623	0	2	6	0	2	69	46	19	87	65	0	3
d__Bacteria	k__norank	p__Bacteroidetes	c__Bacteroidia	o__Bacteroidales	f__Rikenellaceae	g__Rikenellaceae_RC9_gut_group	s__unclassified_g__Rikenellaceae_RC9_gut_group	OTU112	0	0	0	7	0	9	16	12	0	0	1	8
d__Bacteria	k__norank	p__Firmicutes	c__Clostridia	o__Clostridiales	f__Ruminococcaceae	g__Anaerotruncus	s__uncultured_bacterium_g__Anaerotruncus	OTU627	0	0	2	0	0	12	3	2	0	1	1	0
d__Bacteria	k__norank	p__Firmicutes	c__Clostridia	o__Clostridiales	f__unclassified_o__Clostridiales	g__unclassified_o__Clostridiales	s__unclassified_o__Clostridiales	OTU512	0	2	0	0	0	7	1	2	1	10	0	0
d__Bacteria	k__norank	p__Tenericutes	c__Mollicutes	o__Mollicutes_RF9	f__norank_o__Mollicutes_RF9	g__norank_o__Mollicutes_RF9	s__unclassified_g__norank_o__Mollicutes_RF9	OTU390	0	0	1	0	0	0	0	0	0	0	0	0
d__Bacteria	k__norank	p__Firmicutes	c__Clostridia	o__Clostridiales	f__Lachnospiraceae	g__Roseburia	s__uncultured_bacterium_g__Roseburia	OTU52	1	1	13	2	0	0	22	22	1	7	0	0
d__Bacteria	k__norank	p__Firmicutes	c__Bacilli	o__Lactobacillales	f__Aerococcaceae	g__Aerococcus	s__unclassified_g__Aerococcus	OTU527	0	207	0	0	58	0	0	0	0	1	0	0
d__Bacteria	k__norank	p__Bacteroidetes	c__Bacteroidia	o__Bacteroidales	f__Bacteroidales_S24-7_group	g__norank_f__Bacteroidales_S24-7_group	s__uncultured_bacterium_g__norank_f__Bacteroidales_S24-7_group	OTU628	0	0	0	1	0	13	11	5	4	2	0	5
d__Bacteria	k__norank	p__Tenericutes	c__Mollicutes	o__Mollicutes_RF9	f__norank_o__Mollicutes_RF9	g__norank_o__Mollicutes_RF9	s__unclassified_g__norank_o__Mollicutes_RF9	OTU257	0	0	0	0	0	0	0	0	1	3	0	0
d__Bacteria	k__norank	p__Firmicutes	c__Clostridia	o__Clostridiales	f__Lachnospiraceae	g__norank_f__Lachnospiraceae	s__unclassified_g__norank_f__Lachnospiraceae	OTU310	3	2	1	0	2	52	29	64	4	63	1	6
d__Bacteria	k__norank	p__Firmicutes	c__Bacilli	o__Lactobacillales	f__Streptococcaceae	g__Streptococcus	s__unclassified_g__Streptococcus	OTU500	3	52	3	2	12	0	1	2	2	2	6	2
d__Bacteria	k__norank	p__Actinobacteria	c__Actinobacteria	o__Coriobacteriales	f__Coriobacteriaceae	g__unclassified_f__Coriobacteriaceae	s__unclassified_f__Coriobacteriaceae	OTU163	1	7	1	1	3	0	1	0	2	1	6	0
d__Bacteria	k__norank	p__Firmicutes	c__Clostridia	o__Clostridiales	f__Ruminococcaceae	g__Ruminococcaceae_UCG-005	s__uncultured_bacterium_g__Ruminococcaceae_UCG-005	OTU20	8	400	1070	31	7	424	277	13	688	0	14	9
d__Bacteria	k__norank	p__Firmicutes	c__Clostridia	o__Clostridiales	f__Lachnospiraceae	g__Lachnospiraceae_NK4A136_group	s__unclassified_g__Lachnospiraceae_NK4A136_group	OTU597	0	0	3	5	0	54	30	41	59	120	1	18
d__Bacteria	k__norank	p__Cyanobacteria	c__Cyanobacteria	o__norank_c__Cyanobacteria	f__norank_c__Cyanobacteria	g__norank_c__Cyanobacteria	s__unclassified_g__norank_c__Cyanobacteria	OTU124	0	2	0	0	0	0	0	0	0	0	0	0
d__Bacteria	k__norank	p__Firmicutes	c__Clostridia	o__Clostridiales	f__Lachnospiraceae	g__norank_f__Lachnospiraceae	s__unclassified_g__norank_f__Lachnospiraceae	OTU618	0	1	0	1	0	3	9	4	9	18	0	1
d__Bacteria	k__norank	p__Firmicutes	c__Clostridia	o__Clostridiales	f__Ruminococcaceae	g__Papillibacter	s__uncultured_bacterium_g__Papillibacter	OTU552	0	1	7	9	1	2	7	5	9	2	5	9
d__Bacteria	k__norank	p__Firmicutes	c__Clostridia	o__Clostridiales	f__Ruminococcaceae	g__unclassified_f__Ruminococcaceae	s__unclassified_f__Ruminococcaceae	OTU386	1	1	20	13	3	61	87	51	222	91	3	33
d__Bacteria	k__norank	p__Firmicutes	c__Bacilli	o__Lactobacillales	f__Lactobacillaceae	g__Lactobacillus	s__Lactobacillus_intestinalis	OTU542	68	0	12	10	52	1	0	1	1	0	0	1
d__Bacteria	k__norank	p__Firmicutes	c__Clostridia	o__Clostridiales	f__Lachnospiraceae	g__Lachnospiraceae_NK4A136_group	s__unclassified_g__Lachnospiraceae_NK4A136_group	OTU356	0	1	316	7	7	4	248	91	217	1297	5	304
d__Bacteria	k__norank	p__Firmicutes	c__Clostridia	o__Clostridiales	f__Ruminococcaceae	g__Ruminococcaceae_NK4A214_group	s__uncultured_rumen_bacterium_g__Ruminococcaceae_NK4A214_group	OTU640	14	123	82	89	7	118	93	23	60	21	32	16
d__Bacteria	k__norank	p__Tenericutes	c__Mollicutes	o__Anaeroplasmatales	f__Anaeroplasmataceae	g__Anaeroplasma	s__uncultured_bacterium_g__Anaeroplasma	OTU387	2	0	0	0	1	9	0	0	19	0	7	10
d__Bacteria	k__norank	p__Firmicutes	c__Clostridia	o__Clostridiales	f__Lachnospiraceae	g__unclassified_f__Lachnospiraceae	s__unclassified_f__Lachnospiraceae	OTU166	0	0	0	1	0	0	9	2	15	9	0	0
d__Bacteria	k__norank	p__Firmicutes	c__Clostridia	o__Clostridiales	f__Lachnospiraceae	g__unclassified_f__Lachnospiraceae	s__unclassified_f__Lachnospiraceae	OTU168	0	0	0	0	0	0	6	0	0	0	0	0
d__Bacteria	k__norank	p__Firmicutes	c__Clostridia	o__Clostridiales	f__Lachnospiraceae	g__Roseburia	s__unclassified_g__Roseburia	OTU136	0	4	45	12	21	162	5	27	58	0	5	46
d__Bacteria	k__norank	p__Firmicutes	c__Clostridia	o__Clostridiales	f__Christensenellaceae	g__norank_f__Christensenellaceae	s__unclassified_g__norank_f__Christensenellaceae	OTU342	0	1	0	0	1	7	0	0	0	0	1	0
d__Bacteria	k__norank	p__Proteobacteria	c__Alphaproteobacteria	o__Rhodospirillales	f__Rhodospirillaceae	g__norank_f__Rhodospirillaceae	s__uncultured_rumen_bacterium_g__norank_f__Rhodospirillaceae	OTU414	0	1	0	0	0	0	0	0	0	0	1	0
d__Bacteria	k__norank	p__Firmicutes	c__Clostridia	o__Clostridiales	f__unclassified_o__Clostridiales	g__unclassified_o__Clostridiales	s__unclassified_o__Clostridiales	OTU421	0	0	1	0	0	0	0	0	0	0	1	0
d__Bacteria	k__norank	p__Proteobacteria	c__Alphaproteobacteria	o__Rhodospirillales	f__Rhodospirillaceae	g__norank_f__Rhodospirillaceae	s__gut_metagenome_g__norank_f__Rhodospirillaceae	OTU174	0	0	1	0	0	1	1	2	2	0	0	3
d__Bacteria	k__norank	p__Tenericutes	c__Mollicutes	o__Mollicutes_RF9	f__norank_o__Mollicutes_RF9	g__norank_o__Mollicutes_RF9	s__unclassified_g__norank_o__Mollicutes_RF9	OTU223	0	0	0	3	0	4	2	3	0	13	0	0
d__Bacteria	k__norank	p__Bacteroidetes	c__Bacteroidia	o__Bacteroidales	f__Bacteroidales_S24-7_group	g__norank_f__Bacteroidales_S24-7_group	s__uncultured_bacterium_g__norank_f__Bacteroidales_S24-7_group	OTU700	0	1	0	0	0	0	0	0	0	0	0	0
d__Bacteria	k__norank	p__Firmicutes	c__Bacilli	o__Lactobacillales	f__Enterococcaceae	g__Enterococcus	s__unclassified_g__Enterococcus	OTU16	1	12	2	0	3	1	0	0	0	0	1	0
d__Bacteria	k__norank	p__Proteobacteria	c__Gammaproteobacteria	o__Enterobacteriales	f__Enterobacteriaceae	g__Morganella	s__unclassified_g__Morganella	OTU768	0	0	0	0	0	0	0	0	0	0	0	0
d__Bacteria	k__norank	p__Firmicutes	c__Clostridia	o__Clostridiales	f__Lachnospiraceae	g__unclassified_f__Lachnospiraceae	s__unclassified_f__Lachnospiraceae	OTU397	0	0	40	1	6	27	99	31	129	50	4	34
d__Bacteria	k__norank	p__Firmicutes	c__unclassified_p__Firmicutes	o__unclassified_p__Firmicutes	f__unclassified_p__Firmicutes	g__unclassified_p__Firmicutes	s__unclassified_p__Firmicutes	OTU141	37	3	17	11	55	2	0	1	7	0	4	0
d__Bacteria	k__norank	p__Firmicutes	c__Clostridia	o__Clostridiales	f__Ruminococcaceae	g__Ruminococcaceae_UCG-005	s__gut_metagenome_g__Ruminococcaceae_UCG-005	OTU63	0	0	41	0	0	15	23	4	15	0	0	1
d__Bacteria	k__norank	p__Firmicutes	c__Clostridia	o__Clostridiales	f__Ruminococcaceae	g__Ruminiclostridium_6	s__uncultured_bacterium_g__Ruminiclostridium_6	OTU383	1	6	0	10	1	2	19	20	33	18	0	12
d__Bacteria	k__norank	p__Firmicutes	c__Clostridia	o__Clostridiales	f__Lachnospiraceae	g__Lachnospiraceae_NK4A136_group	s__Lachnospiraceae_bacterium_COE1	OTU691	0	2	0	2	0	13	31	4	1	21	0	1
d__Bacteria	k__norank	p__Firmicutes	c__Clostridia	o__Clostridiales	f__Lachnospiraceae	g__norank_f__Lachnospiraceae	s__unclassified_g__norank_f__Lachnospiraceae	OTU461	0	0	12	3	1	17	10	8	9	16	1	3
d__Bacteria	k__norank	p__Firmicutes	c__Clostridia	o__Clostridiales	f__Ruminococcaceae	g__Anaerotruncus	s__unclassified_g__Anaerotruncus	OTU73	0	0	36	1	0	1	0	7	1	2	0	5
d__Bacteria	k__norank	p__Firmicutes	c__Clostridia	o__Clostridiales	f__Lachnospiraceae	g__Tyzzerella_3	s__unclassified_g__Tyzzerella_3	OTU208	0	0	0	0	0	5	0	8	3	1	0	0
d__Bacteria	k__norank	p__Firmicutes	c__Clostridia	o__Clostridiales	f__Ruminococcaceae	g__Ruminococcaceae_UCG-014	s__unclassified_g__Ruminococcaceae_UCG-014	OTU473	0	1	0	0	5	0	0	0	0	0	0	9
d__Bacteria	k__norank	p__Firmicutes	c__Clostridia	o__Clostridiales	f__Lachnospiraceae	g__Lachnospiraceae_NK4A136_group	s__unclassified_g__Lachnospiraceae_NK4A136_group	OTU676	22	0	77	2	6	50	129	32	78	246	8	59
d__Bacteria	k__norank	p__Firmicutes	c__Clostridia	o__Clostridiales	f__Lachnospiraceae	g__unclassified_f__Lachnospiraceae	s__unclassified_f__Lachnospiraceae	OTU710	0	0	0	0	0	0	0	3	1	0	0	0
d__Bacteria	k__norank	p__Saccharibacteria	c__Unknown_Class_p__Saccharibacteria	o__Unknown_Order_c__Unknown_Class_p__Saccharibacteria	f__Unknown_Family_o__Unknown_Order_c__Unknown_Class_p__Saccharibacteria	g__Candidatus_Saccharimonas	s__TM7_phylum_sp._oral_clone_CW040	OTU311	0	0	0	0	1	0	0	0	0	0	0	0
d__Bacteria	k__norank	p__Firmicutes	c__Bacilli	o__Bacillales	f__Family_XI_o__Bacillales	g__Gemella	s__unclassified_g__Gemella	OTU338	1	1	0	0	1	0	1	0	1	0	2	1
d__Bacteria	k__norank	p__Bacteroidetes	c__Bacteroidia	o__Bacteroidales	f__Bacteroidales_S24-7_group	g__norank_f__Bacteroidales_S24-7_group	s__uncultured_bacterium_g__norank_f__Bacteroidales_S24-7_group	OTU491	0	0	0	0	1	1	0	0	0	0	0	0
d__Bacteria	k__norank	p__Bacteroidetes	c__Bacteroidia	o__Bacteroidales	f__Bacteroidaceae	g__Bacteroides	s__Bacteroides_uniformis	OTU193	2	23	46	5	2	7	20	70	14	3	3	5
d__Bacteria	k__norank	p__Bacteroidetes	c__Bacteroidia	o__Bacteroidales	f__Bacteroidales_S24-7_group	g__norank_f__Bacteroidales_S24-7_group	s__uncultured_bacterium_g__norank_f__Bacteroidales_S24-7_group	OTU400	1	20	0	0	0	73	109	2	0	0	4	2
d__Bacteria	k__norank	p__Bacteroidetes	c__Bacteroidia	o__Bacteroidales	f__Bacteroidales_S24-7_group	g__norank_f__Bacteroidales_S24-7_group	s__uncultured_bacterium_g__norank_f__Bacteroidales_S24-7_group	OTU402	0	40	52	30	1	94	97	43	55	47	3	24
d__Bacteria	k__norank	p__Proteobacteria	c__Gammaproteobacteria	o__Pseudomonadales	f__Moraxellaceae	g__Acinetobacter	s__Acinetobacter_ursingii	OTU740	0	10	3	7	5	0	0	1	0	0	6	0
d__Bacteria	k__norank	p__Bacteroidetes	c__Bacteroidia	o__Bacteroidales	f__Bacteroidaceae	g__Bacteroides	s__unclassified_g__Bacteroides	OTU189	0	1	2	6	1	2	21	102	28	10	3	3
d__Bacteria	k__norank	p__Bacteroidetes	c__Bacteroidia	o__Bacteroidales	f__Bacteroidales_S24-7_group	g__norank_f__Bacteroidales_S24-7_group	s__uncultured_bacterium_g__norank_f__Bacteroidales_S24-7_group	OTU156	0	0	0	0	0	305	0	0	0	0	0	0
d__Bacteria	k__norank	p__Bacteroidetes	c__Bacteroidia	o__Bacteroidales	f__Bacteroidales_S24-7_group	g__norank_f__Bacteroidales_S24-7_group	s__uncultured_bacterium_g__norank_f__Bacteroidales_S24-7_group	OTU100	0	0	0	17	0	6	0	43	0	0	1	6
d__Bacteria	k__norank	p__Cyanobacteria	c__Cyanobacteria	o__Gastranaerophilales	f__norank_o__Gastranaerophilales	g__norank_o__Gastranaerophilales	s__unclassified_g__norank_o__Gastranaerophilales	OTU271	0	1	2	3	0	0	0	0	1	1	0	0
d__Bacteria	k__norank	p__Firmicutes	c__Clostridia	o__Clostridiales	f__Ruminococcaceae	g__unclassified_f__Ruminococcaceae	s__unclassified_f__Ruminococcaceae	OTU601	0	0	0	0	0	0	0	1	0	3	0	0
d__Bacteria	k__norank	p__Firmicutes	c__Clostridia	o__Clostridiales	f__Ruminococcaceae	g__norank_f__Ruminococcaceae	s__unclassified_g__norank_f__Ruminococcaceae	OTU296	1	5	43	4	2	66	58	50	36	120	5	22
d__Bacteria	k__norank	p__Firmicutes	c__Clostridia	o__Clostridiales	f__Lachnospiraceae	g__Coprococcus_1	s__uncultured_bacterium_g__Coprococcus_1	OTU410	0	0	2	0	0	13	8	6	4	23	0	2
d__Bacteria	k__norank	p__Firmicutes	c__Clostridia	o__Clostridiales	f__Lachnospiraceae	g__norank_f__Lachnospiraceae	s__unclassified_g__norank_f__Lachnospiraceae	OTU80	0	0	2	2	0	7	8	0	6	6	1	3
d__Bacteria	k__norank	p__Firmicutes	c__Clostridia	o__Clostridiales	f__Ruminococcaceae	g__Ruminococcaceae_UCG-009	s__uncultured_bacterium_g__Ruminococcaceae_UCG-009	OTU605	0	0	0	1	0	2	0	1	0	0	1	2
d__Bacteria	k__norank	p__Firmicutes	c__Clostridia	o__Clostridiales	f__Lachnospiraceae	g__norank_f__Lachnospiraceae	s__unclassified_g__norank_f__Lachnospiraceae	OTU82	0	0	0	1	0	1	0	0	1	5	0	0
d__Bacteria	k__norank	p__Bacteroidetes	c__Bacteroidia	o__Bacteroidales	f__Bacteroidales_S24-7_group	g__norank_f__Bacteroidales_S24-7_group	s__unclassified_g__norank_f__Bacteroidales_S24-7_group	OTU447	0	0	40	1	0	0	0	0	0	0	0	0
d__Bacteria	k__norank	p__Bacteroidetes	c__Bacteroidia	o__Bacteroidales	f__Bacteroidales_S24-7_group	g__norank_f__Bacteroidales_S24-7_group	s__uncultured_organism_g__norank_f__Bacteroidales_S24-7_group	OTU8	0	0	0	0	0	0	0	0	0	0	0	0
d__Bacteria	k__norank	p__Firmicutes	c__Clostridia	o__Clostridiales	f__Ruminococcaceae	g__Ruminococcaceae_UCG-013	s__unclassified_g__Ruminococcaceae_UCG-013	OTU539	0	1	1	1	0	0	1	0	0	1	1	1
d__Bacteria	k__norank	p__Proteobacteria	c__Epsilonproteobacteria	o__Campylobacterales	f__Helicobacteraceae	g__Helicobacter	s__Helicobacter_hepaticus	OTU408	0	0	0	0	0	4	0	0	0	0	0	7
d__Bacteria	k__norank	p__Firmicutes	c__Clostridia	o__Clostridiales	f__Lachnospiraceae	g__Lachnospiraceae_NK4A136_group	s__uncultured_bacterium_g__Lachnospiraceae_NK4A136_group	OTU258	4	1	2	1	3	387	39	41	54	34	1	4
d__Bacteria	k__norank	p__Bacteroidetes	c__Bacteroidia	o__Bacteroidales	f__Bacteroidales_S24-7_group	g__norank_f__Bacteroidales_S24-7_group	s__uncultured_bacterium_g__norank_f__Bacteroidales_S24-7_group	OTU428	0	0	1	0	1	27	0	0	0	0	0	30
d__Bacteria	k__norank	p__Firmicutes	c__Clostridia	o__Clostridiales	f__Ruminococcaceae	g__Anaerotruncus	s__unclassified_g__Anaerotruncus	OTU573	2	7	4	9	4	2	7	0	15	11	2	0
d__Bacteria	k__norank	p__Firmicutes	c__Clostridia	o__Clostridiales	f__Lachnospiraceae	g__norank_f__Lachnospiraceae	s__unclassified_g__norank_f__Lachnospiraceae	OTU720	0	0	1	0	0	15	22	27	16	23	1	0
d__Bacteria	k__norank	p__Firmicutes	c__Clostridia	o__Clostridiales	f__Lachnospiraceae	g__Lachnospiraceae_NK4A136_group	s__uncultured_bacterium_g__Lachnospiraceae_NK4A136_group	OTU252	0	0	1	1	0	24	32	11	34	13	0	5
d__Bacteria	k__norank	p__Firmicutes	c__Clostridia	o__Clostridiales	f__Ruminococcaceae	g__norank_f__Ruminococcaceae	s__unclassified_g__norank_f__Ruminococcaceae	OTU481	0	0	5	0	1	0	7	0	0	3	0	0
d__Bacteria	k__norank	p__Actinobacteria	c__Actinobacteria	o__Coriobacteriales	f__Coriobacteriaceae	g__unclassified_f__Coriobacteriaceae	s__unclassified_f__Coriobacteriaceae	OTU182	2	5	7	4	3	0	1	2	1	2	5	1
d__Bacteria	k__norank	p__Firmicutes	c__Erysipelotrichia	o__Erysipelotrichales	f__Erysipelotrichaceae	g__norank_f__Erysipelotrichaceae	s__uncultured_Erysipelotrichales_bacterium_g__norank	OTU739	0	0	0	0	0	0	0	0	0	0	0	0
d__Bacteria	k__norank	p__Firmicutes	c__Clostridia	o__Clostridiales	f__Ruminococcaceae	g__Ruminococcaceae_UCG-014	s__unclassified_g__Ruminococcaceae_UCG-014	OTU187	1	0	0	0	1	10	13	0	0	1	1	0
d__Bacteria	k__norank	p__Firmicutes	c__Clostridia	o__Clostridiales	f__Ruminococcaceae	g__Ruminococcaceae_UCG-010	s__unclassified_g__Ruminococcaceae_UCG-010	OTU162	0	0	0	0	0	2	2	0	0	0	0	0
d__Bacteria	k__norank	p__Firmicutes	c__Clostridia	o__Clostridiales	f__Lachnospiraceae	g__[Eubacterium]_xylanophilum_group	s__uncultured_bacterium_g__[Eubacterium]_xylanophilum_group	OTU72	5	1	118	11	12	78	93	226	6	299	41	14
d__Bacteria	k__norank	p__Bacteroidetes	c__Bacteroidia	o__Bacteroidales	f__Bacteroidales_S24-7_group	g__norank_f__Bacteroidales_S24-7_group	s__uncultured_bacterium_g__norank_f__Bacteroidales_S24-7_group	OTU678	0	1	0	0	0	10	7	3	2	1	0	1
d__Bacteria	k__norank	p__Bacteroidetes	c__Bacteroidia	o__Bacteroidales	f__Prevotellaceae	g__Prevotella_1	s__Sinorhizobium_sp._GL28	OTU13	0	52	1	0	0	0	0	0	0	0	0	0
d__Bacteria	k__norank	p__Firmicutes	c__Clostridia	o__Clostridiales	f__Lachnospiraceae	g__Lachnospiraceae_NK4A136_group	s__uncultured_bacterium_g__Lachnospiraceae_NK4A136_group	OTU650	6	6	102	41	50	136	748	24	64	361	3	59
d__Bacteria	k__norank	p__Firmicutes	c__Clostridia	o__Clostridiales	f__Ruminococcaceae	g__unclassified_f__Ruminococcaceae	s__unclassified_f__Ruminococcaceae	OTU373	5	0	14	10	4	27	8	19	20	7	5	19
d__Bacteria	k__norank	p__Firmicutes	c__Clostridia	o__Clostridiales	f__Ruminococcaceae	g__Ruminococcaceae_UCG-014	s__unclassified_g__Ruminococcaceae_UCG-014	OTU502	0	3	0	3	2	1	0	0	0	0	2	0
d__Bacteria	k__norank	p__Firmicutes	c__Clostridia	o__Clostridiales	f__Ruminococcaceae	g__norank_f__Ruminococcaceae	s__unclassified_g__norank_f__Ruminococcaceae	OTU161	0	0	0	0	0	9	0	0	0	0	0	0
d__Bacteria	k__norank	p__Actinobacteria	c__Actinobacteria	o__Coriobacteriales	f__Coriobacteriaceae	g__norank_f__Coriobacteriaceae	s__gut_metagenome_g__norank	OTU83	0	1	0	3	0	0	0	0	1	0	0	0
d__Bacteria	k__norank	p__Firmicutes	c__Clostridia	o__Clostridiales	f__Christensenellaceae	g__Christensenellaceae_R-7_group	s__unclassified_g__Christensenellaceae_R-7_group	OTU56	0	0	36	0	2	5	4	4	2	1	5	9
d__Bacteria	k__norank	p__Firmicutes	c__Clostridia	o__Clostridiales	f__Ruminococcaceae	g__Ruminiclostridium_9	s__uncultured_bacterium_g__Ruminiclostridium_9	OTU286	6	14	154	14	15	179	157	109	283	260	10	93
d__Bacteria	k__norank	p__Tenericutes	c__Mollicutes	o__Mollicutes_RF9	f__norank_o__Mollicutes_RF9	g__norank_o__Mollicutes_RF9	s__unclassified_g__norank_o__Mollicutes_RF9	OTU519	0	0	0	0	0	0	0	0	0	0	0	0
d__Bacteria	k__norank	p__Firmicutes	c__Clostridia	o__Clostridiales	f__unclassified_o__Clostridiales	g__unclassified_o__Clostridiales	s__unclassified_o__Clostridiales	OTU183	0	0	1	0	0	1	1	0	0	0	0	1
d__Bacteria	k__norank	p__Firmicutes	c__Clostridia	o__Clostridiales	f__Ruminococcaceae	g__norank_f__Ruminococcaceae	s__[Clostridium]_leptum_g__norank	OTU624	2	17	83	2	2	80	118	56	47	174	5	29
d__Bacteria	k__norank	p__Firmicutes	c__Clostridia	o__Clostridiales	f__Lachnospiraceae	g__Lachnospiraceae_NK4A136_group	s__unclassified_g__Lachnospiraceae_NK4A136_group	OTU522	0	0	3	0	1	2	43	0	48	3	5	9
d__Bacteria	k__norank	p__Firmicutes	c__Clostridia	o__Clostridiales	f__Lachnospiraceae	g__Marvinbryantia	s__uncultured_bacterium_g__Marvinbryantia	OTU456	0	5	1	2	6	0	2	1	3	1	2	3
d__Bacteria	k__norank	p__Tenericutes	c__Mollicutes	o__Mollicutes_RF9	f__norank_o__Mollicutes_RF9	g__norank_o__Mollicutes_RF9	s__uncultured_Erysipelotrichia_bacterium_g__norank	OTU442	0	1	1	1	1	0	0	0	0	0	0	0
d__Bacteria	k__norank	p__Firmicutes	c__Clostridia	o__Clostridiales	f__Ruminococcaceae	g__Anaerotruncus	s__[Clostridium]_leptum_g__Anaerotruncus	OTU293	0	0	2	0	0	4	1	1	3	8	0	1
d__Bacteria	k__norank	p__Bacteroidetes	c__Bacteroidia	o__Bacteroidales	f__Rikenellaceae	g__Alistipes	s__uncultured_bacterium_g__Alistipes	OTU134	0	2	1	1	1	0	11	14	0	0	1	1
d__Bacteria	k__norank	p__Firmicutes	c__Clostridia	o__Clostridiales	f__Lachnospiraceae	g__Lachnospiraceae_UCG-010	s__unclassified_g__Lachnospiraceae_UCG-010	OTU224	0	0	0	0	0	0	2	2	1	0	0	1
d__Bacteria	k__norank	p__Firmicutes	c__Clostridia	o__Clostridiales	f__Ruminococcaceae	g__Ruminococcaceae_UCG-010	s__unclassified_g__Ruminococcaceae_UCG-010	OTU604	1	20	40	16	13	19	21	1	14	15	18	6
d__Bacteria	k__norank	p__Firmicutes	c__Clostridia	o__Clostridiales	f__Lachnospiraceae	g__Lachnospiraceae_NK4A136_group	s__uncultured_bacterium_g__Lachnospiraceae_NK4A136_group	OTU420	0	1	9	2	3	6	5	21	22	9	0	1
d__Bacteria	k__norank	p__Firmicutes	c__Clostridia	o__Clostridiales	f__Ruminococcaceae	g__unclassified_f__Ruminococcaceae	s__unclassified_f__Ruminococcaceae	OTU474	0	0	5	0	2	3	2	1	1	3	0	4
d__Bacteria	k__norank	p__Firmicutes	c__Clostridia	o__Clostridiales	f__Peptococcaceae	g__Peptococcus	s__uncultured_organism_g__Peptococcus	OTU213	0	0	0	0	0	3	2	3	0	0	0	0
d__Bacteria	k__norank	p__Firmicutes	c__Clostridia	o__Clostridiales	f__Ruminococcaceae	g__Ruminococcaceae_UCG-010	s__unclassified_g__Ruminococcaceae_UCG-010	OTU564	0	0	2	0	0	0	1	2	0	1	1	1
d__Bacteria	k__norank	p__Firmicutes	c__Clostridia	o__Clostridiales	f__Christensenellaceae	g__Christensenellaceae_R-7_group	s__bacterium_YE57	OTU727	3	3	17	7	13	36	79	8	32	18	6	9
d__Bacteria	k__norank	p__Firmicutes	c__Clostridia	o__Clostridiales	f__Ruminococcaceae	g__Ruminococcaceae_UCG-014	s__unclassified_g__Ruminococcaceae_UCG-014	OTU121	0	36	39	106	0	0	29	28	48	53	0	67
d__Bacteria	k__norank	p__Firmicutes	c__Clostridia	o__Clostridiales	f__Ruminococcaceae	g__unclassified_f__Ruminococcaceae	s__unclassified_f__Ruminococcaceae	OTU427	0	0	0	0	2	0	1	0	0	0	0	1
d__Bacteria	k__norank	p__Proteobacteria	c__Deltaproteobacteria	o__Desulfovibrionales	f__Desulfovibrionaceae	g__Desulfovibrio	s__uncultured_Desulfovibrionaceae_bacterium	OTU203	0	0	0	1	1	7	2	7	3	1	0	1
d__Bacteria	k__norank	p__Firmicutes	c__Clostridia	o__Clostridiales	f__Ruminococcaceae	g__norank_f__Ruminococcaceae	s__unclassified_g__norank_f__Ruminococcaceae	OTU135	0	0	0	0	8	0	0	1	28	7	1	0
d__Bacteria	k__norank	p__Actinobacteria	c__Actinobacteria	o__Bifidobacteriales	f__Bifidobacteriaceae	g__Bifidobacterium	s__unclassified_g__Bifidobacterium	OTU377	4	214	0	313	20	1	1	8	1	7	11	1284
d__Bacteria	k__norank	p__Firmicutes	c__Clostridia	o__Clostridiales	f__Ruminococcaceae	g__unclassified_f__Ruminococcaceae	s__unclassified_f__Ruminococcaceae	OTU5	0	1	2	1	0	2	9	4	9	1	0	4
d__Bacteria	k__norank	p__Firmicutes	c__Bacilli	o__Lactobacillales	f__Lactobacillaceae	g__Lactobacillus	s__unclassified_g__Lactobacillus	OTU12	11	4	4	1	4	0	0	0	0	0	3	4
d__Bacteria	k__norank	p__Bacteroidetes	c__Bacteroidia	o__Bacteroidales	f__Bacteroidaceae	g__Bacteroides	s__Bacteroides_nordii	OTU192	0	1	2	0	0	2	6	47	0	1	1	0
d__Bacteria	k__norank	p__Bacteroidetes	c__Bacteroidia	o__Bacteroidales	f__Rikenellaceae	g__Alistipes	s__uncultured_bacterium_g__Alistipes	OTU202	0	0	0	9	0	1	1	16	1	0	0	2
d__Bacteria	k__norank	p__Firmicutes	c__Erysipelotrichia	o__Erysipelotrichales	f__Erysipelotrichaceae	g__Allobaculum	s__uncultured_Allobaculum_sp.	OTU36	0	210	0	0	0	0	0	0	0	0	0	5
d__Bacteria	k__norank	p__Firmicutes	c__Clostridia	o__Clostridiales	f__Lachnospiraceae	g__norank_f__Lachnospiraceae	s__uncultured_bacterium_g__norank_f__Lachnospiraceae	OTU250	0	0	0	0	0	4	10	3	1	0	0	2
d__Bacteria	k__norank	p__Proteobacteria	c__Gammaproteobacteria	o__Enterobacteriales	f__Enterobacteriaceae	g__Escherichia-Shigella	s__unclassified_g__Escherichia-Shigella	OTU769	1	9	6	1	0	3	3	15	0	1	1	5
d__Bacteria	k__norank	p__Firmicutes	c__Erysipelotrichia	o__Erysipelotrichales	f__Erysipelotrichaceae	g__Faecalitalea	s__uncultured_organism_g__Faecalitalea	OTU44	0	8	0	0	0	0	0	0	0	0	0	0
d__Bacteria	k__norank	p__Firmicutes	c__Clostridia	o__Clostridiales	f__Ruminococcaceae	g__Ruminococcaceae_UCG-014	s__uncultured_bacterium_g__Ruminococcaceae_UCG-014	OTU375	0	3	0	1	0	1	4	0	1	0	1	3
d__Bacteria	k__norank	p__Firmicutes	c__Clostridia	o__Clostridiales	f__Lachnospiraceae	g__norank_f__Lachnospiraceae	s__uncultured_bacterium_g__norank_f__Lachnospiraceae	OTU159	0	0	0	0	0	33	1	0	0	0	0	0
d__Bacteria	k__norank	p__Firmicutes	c__Clostridia	o__Clostridiales	f__Lachnospiraceae	g__Roseburia	s__unclassified_g__Roseburia	OTU220	0	0	1	0	0	6	0	39	6	8	0	6
d__Bacteria	k__norank	p__Actinobacteria	c__Actinobacteria	o__Coriobacteriales	f__Coriobacteriaceae	g__Enterorhabdus	s__uncultured_bacterium_g__Enterorhabdus	OTU646	0	2	65	3	4	4	0	7	1	0	0	9
d__Bacteria	k__norank	p__Bacteroidetes	c__Bacteroidia	o__Bacteroidales	f__Bacteroidales_S24-7_group	g__norank_f__Bacteroidales_S24-7_group	s__uncultured_bacterium_g__norank_f__Bacteroidales_S24-7_group	OTU88	0	0	0	6	0	1	2	1	2	0	0	1
d__Bacteria	k__norank	p__Firmicutes	c__Erysipelotrichia	o__Erysipelotrichales	f__Erysipelotrichaceae	g__unclassified_f__Erysipelotrichaceae	s__unclassified_f__Erysipelotrichaceae	OTU9	2	0	0	0	4	1	4	3	0	0	1	4
d__Bacteria	k__norank	p__Firmicutes	c__Erysipelotrichia	o__Erysipelotrichales	f__Erysipelotrichaceae	g__Erysipelatoclostridium	s__uncultured_bacterium_g__Erysipelatoclostridium	OTU34	0	11	0	0	0	16	0	1	0	1	2	0
d__Bacteria	k__norank	p__Firmicutes	c__Erysipelotrichia	o__Erysipelotrichales	f__Erysipelotrichaceae	g__unclassified_f__Erysipelotrichaceae	s__unclassified_f__Erysipelotrichaceae	OTU93	0	0	0	0	0	1	0	2	0	2	1	0
d__Bacteria	k__norank	p__Firmicutes	c__Clostridia	o__Clostridiales	f__Lachnospiraceae	g__norank_f__Lachnospiraceae	s__unclassified_g__norank_f__Lachnospiraceae	OTU307	0	2	1	4	1	2	60	1	107	49	0	1
d__Bacteria	k__norank	p__Firmicutes	c__Clostridia	o__Clostridiales	f__Lachnospiraceae	g__unclassified_f__Lachnospiraceae	s__unclassified_f__Lachnospiraceae	OTU693	4	4	14	2	5	14	6	1	7	11	5	4
d__Bacteria	k__norank	p__Firmicutes	c__Clostridia	o__Clostridiales	f__Ruminococcaceae	g__Anaerotruncus	s__uncultured_bacterium_g__Anaerotruncus	OTU244	0	0	0	0	1	4	1	2	5	1	0	0
d__Bacteria	k__norank	p__Firmicutes	c__Clostridia	o__Clostridiales	f__Lachnospiraceae	g__norank_f__Lachnospiraceae	s__unclassified_g__norank_f__Lachnospiraceae	OTU549	0	0	4	2	0	2	10	6	19	12	0	0
d__Bacteria	k__norank	p__Actinobacteria	c__Actinobacteria	o__Micrococcales	f__Microbacteriaceae	g__Curtobacterium	s__Curtobacterium_luteum	OTU754	0	0	0	0	0	0	0	0	0	0	0	0
d__Bacteria	k__norank	p__Actinobacteria	c__Actinobacteria	o__Micrococcales	f__Micrococcaceae	g__Rothia	s__unclassified_g__Rothia	OTU133	4	265	0	38	49	1	8	6	12	6	10	8
d__Bacteria	k__norank	p__Firmicutes	c__Clostridia	o__Thermoanaerobacterales	f__Thermoanaerobacteraceae	g__Gelria	s__uncultured_bacterium_g__Gelria	OTU395	0	0	1	1	0	1	1	1	0	0	0	1
d__Bacteria	k__norank	p__Firmicutes	c__Clostridia	o__Clostridiales	f__Lachnospiraceae	g__unclassified_f__Lachnospiraceae	s__unclassified_f__Lachnospiraceae	OTU199	0	0	3	0	1	0	11	7	20	35	0	0
d__Bacteria	k__norank	p__Firmicutes	c__Bacilli	o__Lactobacillales	f__Lactobacillaceae	g__Lactobacillus	s__uncultured_bacterium_g__Lactobacillus	OTU144	76	105	6	44	139	0	0	0	2	0	2	13
d__Bacteria	k__norank	p__Actinobacteria	c__Actinobacteria	o__Coriobacteriales	f__Coriobacteriaceae	g__Enterorhabdus	s__uncultured_bacterium_g__Enterorhabdus	OTU70	17	8	47	15	14	0	4	8	4	3	24	25
d__Bacteria	k__norank	p__Actinobacteria	c__Actinobacteria	o__Coriobacteriales	f__Coriobacteriaceae	g__Enterorhabdus	s__uncultured_bacterium_g__Enterorhabdus	OTU71	10	186	29	25	7	0	5	8	4	15	4	17
d__Bacteria	k__norank	p__Bacteroidetes	c__Bacteroidia	o__Bacteroidales	f__Prevotellaceae	g__Prevotellaceae_NK3B31_group	s__uncultured_bacterium_g__Prevotellaceae_NK3B31_group	OTU118	0	3	50	135	1	14	764	36	339	33	1	4
d__Bacteria	k__norank	p__Firmicutes	c__Clostridia	o__Clostridiales	f__Lachnospiraceae	g__unclassified_f__Lachnospiraceae	s__unclassified_f__Lachnospiraceae	OTU194	1	1	1	0	2	28	28	11	11	0	0	7
d__Bacteria	k__norank	p__Firmicutes	c__Clostridia	o__Clostridiales	f__Clostridiales_vadinBB60_group	g__norank_f__Clostridiales_vadinBB60_group	s__unclassified_g__norank_f__Clostridiales_vadinBB60_group	OTU298	0	0	0	1	0	2	1	24	0	3	1	0
d__Bacteria	k__norank	p__Proteobacteria	c__Alphaproteobacteria	o__Rhodospirillales	f__Rhodospirillaceae	g__norank_f__Rhodospirillaceae	s__gut_metagenome_g__norank_f__Rhodospirillaceae	OTU662	1	0	0	0	0	0	0	4	1	1	0	0
d__Bacteria	k__norank	p__Firmicutes	c__Clostridia	o__Clostridiales	f__Ruminococcaceae	g__Ruminococcus_1	s__unclassified_g__Ruminococcus_1	OTU677	3	0	19	0	10	519	38	31	1	73	9	48
d__Bacteria	k__norank	p__Firmicutes	c__Clostridia	o__Clostridiales	f__Ruminococcaceae	g__Anaerotruncus	s__[Clostridium]_leptum_g__Anaerotruncus	OTU282	0	1	4	0	0	25	7	9	19	26	0	6
d__Bacteria	k__norank	p__Bacteroidetes	c__Bacteroidia	o__Bacteroidales	f__Bacteroidales_S24-7_group	g__norank_f__Bacteroidales_S24-7_group	s__uncultured_bacterium_g__norank_f__Bacteroidales_S24-7_group	OTU524	0	7	35	0	0	0	0	0	0	0	0	0
d__Bacteria	k__norank	p__Firmicutes	c__Clostridia	o__Clostridiales	f__Ruminococcaceae	g__Ruminococcus_1	s__unclassified_g__Ruminococcus_1	OTU602	0	12	2	1	0	5	18	2	31	4	0	0
d__Bacteria	k__norank	p__Proteobacteria	c__Betaproteobacteria	o__Burkholderiales	f__Alcaligenaceae	g__Parasutterella	s__Sutterellaceae_bacterium_YL45	OTU349	0	0	0	0	0	0	0	0	0	0	0	1
d__Bacteria	k__norank	p__Firmicutes	c__Clostridia	o__Clostridiales	f__Lachnospiraceae	g__Lachnospiraceae_NK4A136_group	s__unclassified_g__Lachnospiraceae_NK4A136_group	OTU230	0	0	4	3	1	6	45	80	4	7	2	1
d__Bacteria	k__norank	p__Firmicutes	c__Clostridia	o__Clostridiales	f__Peptostreptococcaceae	g__Romboutsia	s__unclassified_g__Romboutsia	OTU143	4184	1458	1707	1737	4382	948	331	940	781	1849	5211	1331
d__Bacteria	k__norank	p__Firmicutes	c__Bacilli	o__Bacillales	f__Staphylococcaceae	g__Jeotgalicoccus	s__unclassified_g__Jeotgalicoccus	OTU18	0	18	0	0	0	0	0	0	0	0	0	0
d__Bacteria	k__norank	p__Bacteroidetes	c__Bacteroidia	o__Bacteroidales	f__Bacteroidales_S24-7_group	g__norank_f__Bacteroidales_S24-7_group	s__uncultured_bacterium_g__norank_f__Bacteroidales_S24-7_group	OTU116	0	0	4	14	1	0	18	19	18	2	2	3
d__Bacteria	k__norank	p__Bacteroidetes	c__Bacteroidia	o__Bacteroidales	f__Bacteroidales_S24-7_group	g__norank_f__Bacteroidales_S24-7_group	s__uncultured_bacterium_g__norank_f__Bacteroidales_S24-7_group	OTU115	0	4	20	170	21	98	163	64	115	166	6	104
d__Bacteria	k__norank	p__Firmicutes	c__Erysipelotrichia	o__Erysipelotrichales	f__Erysipelotrichaceae	g__Faecalibaculum	s__uncultured_bacterium_g__Faecalibaculum	OTU346	0	18	2	3	1	0	1	1	0	0	2	16
d__Bacteria	k__norank	p__Actinobacteria	c__Actinobacteria	o__Frankiales	f__Geodermatophilaceae	g__Blastococcus	s__uncultured_Blastococcus_sp._g__Blastococcus	OTU758	0	0	0	0	0	0	0	0	0	0	0	0
d__Bacteria	k__norank	p__Cyanobacteria	c__Cyanobacteria	o__Gastranaerophilales	f__norank_o__Gastranaerophilales	g__norank_o__Gastranaerophilales	s__uncultured_bacterium_g__norank_o__Gastranaerophilales	OTU488	0	2	0	0	0	0	0	5	0	0	0	0
d__Bacteria	k__norank	p__Tenericutes	c__Mollicutes	o__Mollicutes_RF9	f__norank_o__Mollicutes_RF9	g__norank_o__Mollicutes_RF9	s__unclassified_g__norank_o__Mollicutes_RF9	OTU511	0	0	3	0	0	0	0	0	1	0	0	1
d__Bacteria	k__norank	p__Bacteroidetes	c__Bacteroidia	o__Bacteroidales	f__Bacteroidales_S24-7_group	g__norank_f__Bacteroidales_S24-7_group	s__unclassified_g__norank_f__Bacteroidales_S24-7_group	OTU365	0	0	2	27	3	7	40	1	0	6	0	4
d__Bacteria	k__norank	p__Bacteroidetes	c__Bacteroidia	o__Bacteroidales	f__Porphyromonadaceae	g__Parabacteroides	s__unclassified_g__Parabacteroides	OTU97	0	6	16	18	0	8	15	28	11	12	1	8
d__Bacteria	k__norank	p__Bacteroidetes	c__Bacteroidia	o__Bacteroidales	f__Bacteroidales_S24-7_group	g__norank_f__Bacteroidales_S24-7_group	s__unclassified_g__norank_f__Bacteroidales_S24-7_group	OTU360	0	4	4	0	2	5	9	8	7	4	0	2
d__Bacteria	k__norank	p__Firmicutes	c__Clostridia	o__Clostridiales	f__Lachnospiraceae	g__Lachnospiraceae_NK4A136_group	s__uncultured_bacterium_g__Lachnospiraceae_NK4A136_group	OTU729	0	0	6	5	0	25	16	12	15	32	0	14
d__Bacteria	k__norank	p__Firmicutes	c__Clostridia	o__Clostridiales	f__Lachnospiraceae	g__Lachnospiraceae_UCG-001	s__unclassified_g__Lachnospiraceae_UCG-001	OTU172	0	0	0	0	0	0	37	0	234	0	0	0
d__Bacteria	k__norank	p__Firmicutes	c__Clostridia	o__Clostridiales	f__Peptococcaceae	g__norank_f__Peptococcaceae	s__uncultured_bacterium_g__norank_f__Peptococcaceae	OTU42	0	0	1	0	0	2	0	0	1	1	0	0
d__Bacteria	k__norank	p__Firmicutes	c__Clostridia	o__Clostridiales	f__Lachnospiraceae	g__unclassified_f__Lachnospiraceae	s__unclassified_f__Lachnospiraceae	OTU540	0	0	1	2	1	20	3	50	4	34	3	1
d__Bacteria	k__norank	p__Firmicutes	c__Clostridia	o__Clostridiales	f__Clostridiales_vadinBB60_group	g__norank_f__Clostridiales_vadinBB60_group	s__uncultured_bacterium_g__norank_f__Clostridiales_vadinBB60_group	OTU637	0	0	0	0	0	1	0	0	0	0	0	0
d__Bacteria	k__norank	p__Firmicutes	c__Clostridia	o__Clostridiales	f__Lachnospiraceae	g__Lachnospiraceae_NK4A136_group	s__uncultured_bacterium_g__Lachnospiraceae_NK4A136_group	OTU297	0	0	21	0	0	0	2	2	7	80	0	1
d__Bacteria	k__norank	p__Firmicutes	c__Clostridia	o__Clostridiales	f__Lachnospiraceae	g__norank_f__Lachnospiraceae	s__unclassified_g__norank_f__Lachnospiraceae	OTU487	0	1	1	1	1	22	11	4	3	20	0	0
d__Bacteria	k__norank	p__Firmicutes	c__Clostridia	o__Clostridiales	f__Clostridiales_vadinBB60_group	g__norank_f__Clostridiales_vadinBB60_group	s__uncultured_bacterium_g__norank_f__Clostridiales_vadinBB60_group	OTU737	0	0	0	0	0	0	0	0	0	0	0	0
d__Bacteria	k__norank	p__Firmicutes	c__Clostridia	o__Clostridiales	f__Lachnospiraceae	g__unclassified_f__Lachnospiraceae	s__unclassified_f__Lachnospiraceae	OTU536	0	0	0	0	0	1	0	0	2	4	0	1
d__Bacteria	k__norank	p__Firmicutes	c__Clostridia	o__Clostridiales	f__Lachnospiraceae	g__Lachnospiraceae_NK4A136_group	s__uncultured_bacterium_g__Lachnospiraceae_NK4A136_group	OTU291	0	0	0	0	0	1	22	0	0	1	0	0
d__Bacteria	k__norank	p__Bacteroidetes	c__Bacteroidia	o__Bacteroidales	f__Bacteroidales_S24-7_group	g__norank_f__Bacteroidales_S24-7_group	s__uncultured_bacterium_g__norank_f__Bacteroidales_S24-7_group	OTU206	2	0	12	4	3	35	45	31	45	20	5	51
d__Bacteria	k__norank	p__Proteobacteria	c__Deltaproteobacteria	o__Desulfovibrionales	f__Desulfovibrionaceae	g__Desulfovibrio	s__unclassified_g__Desulfovibrio	OTU556	0	0	1	0	0	0	0	0	1	0	0	0
d__Bacteria	k__norank	p__Bacteroidetes	c__Bacteroidia	o__Bacteroidales	f__Bacteroidales_S24-7_group	g__norank_f__Bacteroidales_S24-7_group	s__uncultured_bacterium_g__norank_f__Bacteroidales_S24-7_group	OTU204	0	0	12	6	0	235	22	342	8	0	1	3
d__Bacteria	k__norank	p__Bacteroidetes	c__Bacteroidia	o__Bacteroidales	f__Prevotellaceae	g__Prevotellaceae_NK3B31_group	s__uncultured_bacterium_g__Prevotellaceae_NK3B31_group	OTU92	1	1	3	219	0	15	3	2	45	2	4	8
d__Bacteria	k__norank	p__Bacteroidetes	c__Bacteroidia	o__Bacteroidales	f__Prevotellaceae	g__Prevotellaceae_NK3B31_group	s__uncultured_bacterium_g__Prevotellaceae_NK3B31_group	OTU94	58	321	1	1245	45	1	31	0	249	21	39	1
d__Bacteria	k__norank	p__Proteobacteria	c__Deltaproteobacteria	o__Desulfovibrionales	f__Desulfovibrionaceae	g__Desulfovibrio	s__unclassified_g__Desulfovibrio	OTU498	10	123	146	19	3	47	34	22	60	201	21	24
d__Bacteria	k__norank	p__Firmicutes	c__Clostridia	o__Clostridiales	f__Ruminococcaceae	g__Anaerotruncus	s__uncultured_bacterium_g__Anaerotruncus	OTU479	0	3	9	3	1	6	10	4	10	7	0	5
d__Bacteria	k__norank	p__Firmicutes	c__Clostridia	o__Clostridiales	f__Ruminococcaceae	g__Ruminococcaceae_UCG-005	s__uncultured_Clostridiales_bacterium_g__Ruminococcaceae_UCG-005	OTU3	0	0	0	0	0	1	3	2	3	2	0	0
d__Bacteria	k__norank	p__Firmicutes	c__Clostridia	o__Clostridiales	f__Ruminococcaceae	g__unclassified_f__Ruminococcaceae	s__unclassified_f__Ruminococcaceae	OTU128	0	0	0	0	1	0	0	0	0	3	4	1
d__Bacteria	k__norank	p__Firmicutes	c__Clostridia	o__Clostridiales	f__Lachnospiraceae	g__unclassified_f__Lachnospiraceae	s__unclassified_f__Lachnospiraceae	OTU54	0	0	1	0	0	2	0	0	0	5	0	0
d__Bacteria	k__norank	p__Bacteroidetes	c__Bacteroidia	o__Bacteroidales	f__Bacteroidales_S24-7_group	g__norank_f__Bacteroidales_S24-7_group	s__uncultured_bacterium_g__norank_f__Bacteroidales_S24-7_group	OTU630	0	0	0	0	0	0	0	0	0	0	0	0
d__Bacteria	k__norank	p__Firmicutes	c__Clostridia	o__Clostridiales	f__Ruminococcaceae	g__unclassified_f__Ruminococcaceae	s__unclassified_f__Ruminococcaceae	OTU140	2	0	25	1	2	2	3	3	14	15	6	4
d__Bacteria	k__norank	p__Firmicutes	c__Clostridia	o__Clostridiales	f__Lachnospiraceae	g__unclassified_f__Lachnospiraceae	s__unclassified_f__Lachnospiraceae	OTU243	0	0	0	0	0	0	0	53	1	0	0	0
d__Bacteria	k__norank	p__Firmicutes	c__Clostridia	o__Clostridiales	f__Ruminococcaceae	g__Anaerotruncus	s__uncultured_bacterium_g__Anaerotruncus	OTU731	0	0	0	0	0	2	4	2	5	0	1	1
d__Bacteria	k__norank	p__Firmicutes	c__Clostridia	o__Clostridiales	f__Lachnospiraceae	g__Lachnospiraceae_NK4A136_group	s__uncultured_bacterium_g__Lachnospiraceae_NK4A136_group	OTU617	0	2	6	6	4	3	18	20	16	31	0	0
d__Bacteria	k__norank	p__Firmicutes	c__Clostridia	o__Clostridiales	f__Christensenellaceae	g__Christensenellaceae_R-7_group	s__uncultured_bacterium_g__Christensenellaceae_R-7_group	OTU275	0	3	5	2	4	5	0	1	1	3	6	2
d__Bacteria	k__norank	p__Firmicutes	c__Clostridia	o__Clostridiales	f__Ruminococcaceae	g__norank_f__Ruminococcaceae	s__unclassified_g__norank_f__Ruminococcaceae	OTU670	0	0	0	0	0	1	0	1	0	0	0	0
d__Bacteria	k__norank	p__Firmicutes	c__Clostridia	o__Clostridiales	f__Lachnospiraceae	g__norank_f__Lachnospiraceae	s__unclassified_g__norank_f__Lachnospiraceae	OTU714	0	0	2	0	0	22	4	5	2	4	0	3
d__Bacteria	k__norank	p__Firmicutes	c__Clostridia	o__Clostridiales	f__Lachnospiraceae	g__unclassified_f__Lachnospiraceae	s__unclassified_f__Lachnospiraceae	OTU247	0	0	1	1	0	0	14	0	15	8	0	2
d__Bacteria	k__norank	p__Firmicutes	c__Clostridia	o__Clostridiales	f__Lachnospiraceae	g__norank_f__Lachnospiraceae	s__uncultured_bacterium_g__norank_f__Lachnospiraceae	OTU485	0	6	0	0	0	2	0	0	0	0	0	0
d__Bacteria	k__norank	p__Firmicutes	c__Clostridia	o__Clostridiales	f__Lachnospiraceae	g__norank_f__Lachnospiraceae	s__unclassified_g__norank_f__Lachnospiraceae	OTU289	0	0	0	0	0	1	1	1	0	36	0	0
d__Bacteria	k__norank	p__Proteobacteria	c__Deltaproteobacteria	o__Desulfovibrionales	f__Desulfovibrionaceae	g__Desulfovibrio	s__uncultured_Desulfovibrionales_bacterium_g__Desulfovibrio	OTU265	0	2	2	0	0	3	1	2	1	2	0	0
d__Bacteria	k__norank	p__Firmicutes	c__Clostridia	o__Clostridiales	f__Ruminococcaceae	g__Ruminiclostridium_5	s__unclassified_g__Ruminiclostridium_5	OTU716	0	0	2	0	1	10	8	7	8	4	1	4
d__Bacteria	k__norank	p__Firmicutes	c__Clostridia	o__Clostridiales	f__Ruminococcaceae	g__Ruminococcus_2	s__unclassified_g__Ruminococcus_2	OTU559	0	0	90	0	26	0	1	0	0	0	0	30
d__Bacteria	k__norank	p__Firmicutes	c__Clostridia	o__Clostridiales	f__Lachnospiraceae	g__norank_f__Lachnospiraceae	s__uncultured_bacterium_g__norank_f__Lachnospiraceae	OTU713	0	0	0	0	0	0	0	0	0	0	0	0
d__Bacteria	k__norank	p__Bacteroidetes	c__Bacteroidia	o__Bacteroidales	f__Bacteroidales_S24-7_group	g__norank_f__Bacteroidales_S24-7_group	s__uncultured_bacterium_g__norank_f__Bacteroidales_S24-7_group	OTU651	2	0	0	0	0	0	31	0	0	0	0	0
d__Bacteria	k__norank	p__Firmicutes	c__Clostridia	o__Clostridiales	f__Ruminococcaceae	g__Oscillibacter	s__unclassified_g__Oscillibacter	OTU571	0	1	17	8	5	9	48	18	52	10	1	6
d__Bacteria	k__norank	p__Firmicutes	c__Clostridia	o__Clostridiales	f__Ruminococcaceae	g__Oscillibacter	s__unclassified_g__Oscillibacter	OTU570	2	3	9	5	9	106	65	47	190	55	3	8
d__Bacteria	k__norank	p__Firmicutes	c__Clostridia	o__Clostridiales	f__Clostridiales_vadinBB60_group	g__norank_f__Clostridiales_vadinBB60_group	s__unclassified_g__norank_f__Clostridiales_vadinBB60_group	OTU358	2	0	0	0	0	0	0	0	0	0	0	2
d__Bacteria	k__norank	p__Firmicutes	c__Clostridia	o__Clostridiales	f__Lachnospiraceae	g__Roseburia	s__unclassified_g__Roseburia	OTU503	5	14	57	16	50	158	36	318	125	209	1	108
d__Bacteria	k__norank	p__Firmicutes	c__Clostridia	o__Clostridiales	f__Ruminococcaceae	g__Ruminococcaceae_UCG-014	s__unclassified_g__Ruminococcaceae_UCG-014	OTU65	0	0	14	2	2	4	5	0	1	0	3	0
d__Bacteria	k__norank	p__Actinobacteria	c__Actinobacteria	o__Coriobacteriales	f__Coriobacteriaceae	g__Enterorhabdus	s__uncultured_bacterium_g__Enterorhabdus	OTU398	3	8	74	5	8	0	1	12	2	1	11	6
d__Bacteria	k__norank	p__Firmicutes	c__Clostridia	o__Clostridiales	f__Lachnospiraceae	g__norank_f__Lachnospiraceae	s__uncultured_bacterium_g__norank_f__Lachnospiraceae	OTU658	0	0	0	0	0	0	0	0	2	0	0	0
d__Bacteria	k__norank	p__Firmicutes	c__Clostridia	o__Clostridiales	f__Ruminococcaceae	g__Ruminiclostridium_9	s__uncultured_bacterium_g__Ruminiclostridium_9	OTU254	0	1	0	1	1	4	6	4	14	7	0	4
d__Bacteria	k__norank	p__Firmicutes	c__Clostridia	o__Clostridiales	f__Ruminococcaceae	g__unclassified_f__Ruminococcaceae	s__unclassified_f__Ruminococcaceae	OTU305	0	1	3	6	0	2	4	0	4	3	0	1
d__Bacteria	k__norank	p__Tenericutes	c__Mollicutes	o__Mollicutes_RF9	f__norank_o__Mollicutes_RF9	g__norank_o__Mollicutes_RF9	s__uncultured_bacterium_g__norank_o__Mollicutes_RF9	OTU60	0	0	1	0	0	0	0	0	0	0	0	0
d__Bacteria	k__norank	p__Firmicutes	c__Clostridia	o__Clostridiales	f__Ruminococcaceae	g__unclassified_f__Ruminococcaceae	s__unclassified_f__Ruminococcaceae	OTU261	0	4	3	16	2	17	41	17	30	13	4	18
d__Bacteria	k__norank	p__Bacteroidetes	c__Bacteroidia	o__Bacteroidales	f__Bacteroidales_S24-7_group	g__norank_f__Bacteroidales_S24-7_group	s__uncultured_bacterium_g__norank_f__Bacteroidales_S24-7_group	OTU45	0	24	0	0	12	15	0	0	0	0	0	0
d__Bacteria	k__norank	p__Firmicutes	c__Clostridia	o__Clostridiales	f__Lachnospiraceae	g__Lachnospiraceae_NK4A136_group	s__uncultured_bacterium_g__Lachnospiraceae_NK4A136_group	OTU233	0	0	75	2	3	0	10	148	20	271	0	3
d__Bacteria	k__norank	p__Firmicutes	c__Clostridia	o__Clostridiales	f__Ruminococcaceae	g__unclassified_f__Ruminococcaceae	s__unclassified_f__Ruminococcaceae	OTU309	0	0	0	0	0	0	2	0	1	0	0	0
d__Bacteria	k__norank	p__Firmicutes	c__Clostridia	o__Clostridiales	f__Ruminococcaceae	g__Ruminococcaceae_UCG-005	s__unclassified_g__Ruminococcaceae_UCG-005	OTU621	0	6	11	0	1	29	19	0	50	0	0	2
d__Bacteria	k__norank	p__Firmicutes	c__Clostridia	o__Clostridiales	f__Ruminococcaceae	g__Oscillibacter	s__unclassified_g__Oscillibacter	OTU186	0	0	4	0	0	2	2	4	4	15	0	2
d__Bacteria	k__norank	p__Firmicutes	c__Clostridia	o__Clostridiales	f__Ruminococcaceae	g__Oscillibacter	s__unclassified_g__Oscillibacter	OTU594	1	0	9	1	1	13	5	12	25	16	1	6
d__Bacteria	k__norank	p__Firmicutes	c__Clostridia	o__Clostridiales	f__Lachnospiraceae	g__norank_f__Lachnospiraceae	s__uncultured_bacterium_g__norank_f__Lachnospiraceae	OTU87	0	0	9	0	1	1	9	11	3	3	0	1
d__Bacteria	k__norank	p__Firmicutes	c__Clostridia	o__Clostridiales	f__Ruminococcaceae	g__Ruminococcaceae_NK4A214_group	s__unclassified_g__Ruminococcaceae_NK4A214_group	OTU389	0	0	2	0	0	1	3	0	8	2	0	5
d__Bacteria	k__norank	p__Firmicutes	c__Clostridia	o__Clostridiales	f__Ruminococcaceae	g__Ruminococcaceae_UCG-014	s__[Clostridium]_papyrosolvens_g__Ruminococcaceae_UCG-014	OTU433	0	30	3	21	1	0	0	0	1	14	1	0
d__Bacteria	k__norank	p__Actinobacteria	c__Actinobacteria	o__Coriobacteriales	f__Coriobacteriaceae	g__norank_f__Coriobacteriaceae	s__uncultured_bacterium_g__norank_f__Coriobacteriaceae	OTU465	11	100	7	80	45	2	7	0	8	9	0	16
d__Bacteria	k__norank	p__Proteobacteria	c__Betaproteobacteria	o__Burkholderiales	f__Alcaligenaceae	g__Parasutterella	s__uncultured_organism_g__Parasutterella	OTU779	0	1	0	1	0	7	16	0	5	2	0	4
d__Bacteria	k__norank	p__Firmicutes	c__Clostridia	o__Clostridiales	f__Lachnospiraceae	g__Roseburia	s__unclassified_g__Roseburia	OTU439	0	1	0	6	3	21	88	2	131	3	10	10
d__Bacteria	k__norank	p__Firmicutes	c__Clostridia	o__Clostridiales	f__Ruminococcaceae	g__Oscillibacter	s__unclassified_g__Oscillibacter	OTU290	0	0	0	1	3	1	9	2	7	10	0	1
d__Bacteria	k__norank	p__Bacteroidetes	c__Bacteroidia	o__Bacteroidales	f__Bacteroidales_S24-7_group	g__norank_f__Bacteroidales_S24-7_group	s__uncultured_bacterium_g__norank_f__Bacteroidales_S24-7_group	OTU178	6	19	38	40	18	104	112	154	140	76	14	96
d__Bacteria	k__norank	p__Firmicutes	c__Bacilli	o__Lactobacillales	f__Lactobacillaceae	g__Lactobacillus	s__Lactobacillus_intestinalis	OTU50	830	1238	353	592	2753	23	8	11	173	1	44	46
d__Bacteria	k__norank	p__Cyanobacteria	c__Cyanobacteria	o__Gastranaerophilales	f__norank_o__Gastranaerophilales	g__norank_o__Gastranaerophilales	s__uncultured_rumen_bacterium_g__norank_o__Gastranaerophilales	OTU78	1	0	4	1	0	3	6	0	3	0	3	1
d__Bacteria	k__norank	p__Bacteroidetes	c__Bacteroidia	o__Bacteroidales	f__Prevotellaceae	g__Paraprevotella	s__gut_metagenome_g__Paraprevotella	OTU401	0	0	1	6	0	0	5	4	6	1	2	2
d__Bacteria	k__norank	p__Firmicutes	c__Clostridia	o__Clostridiales	f__Lachnospiraceae	g__Lachnospiraceae_NK4A136_group	s__unclassified_g__Lachnospiraceae_NK4A136_group	OTU462	0	0	0	2	0	0	213	0	6	2	0	6
d__Bacteria	k__norank	p__Proteobacteria	c__Gammaproteobacteria	o__Aeromonadales	f__Aeromonadaceae	g__Aeromonas	s__unclassified_g__Aeromonas	OTU760	0	0	0	0	0	0	0	0	0	0	0	0
d__Bacteria	k__norank	p__Firmicutes	c__Clostridia	o__Clostridiales	f__Lachnospiraceae	g__unclassified_f__Lachnospiraceae	s__unclassified_f__Lachnospiraceae	OTU154	0	0	0	0	0	10	0	1	0	0	0	0
d__Bacteria	k__norank	p__Firmicutes	c__Clostridia	o__Clostridiales	f__Ruminococcaceae	g__Ruminococcaceae_UCG-013	s__uncultured_bacterium_g__Ruminococcaceae_UCG-013	OTU86	0	0	3	1	1	5	4	2	0	0	0	1
d__Bacteria	k__norank	p__Firmicutes	c__Clostridia	o__Clostridiales	f__Lachnospiraceae	g__unclassified_f__Lachnospiraceae	s__unclassified_f__Lachnospiraceae	OTU157	0	0	6	1	2	12	0	1	18	4	2	1
d__Bacteria	k__norank	p__Firmicutes	c__Clostridia	o__Clostridiales	f__Lachnospiraceae	g__unclassified_f__Lachnospiraceae	s__unclassified_f__Lachnospiraceae	OTU150	0	0	1	0	0	13	12	5	18	35	0	1
d__Bacteria	k__norank	p__Firmicutes	c__Clostridia	o__Clostridiales	f__Ruminococcaceae	g__Ruminococcaceae_UCG-014	s__uncultured_Ruminococcaceae_bacterium_g__Ruminococcaceae_UCG-014	OTU582	0	0	0	0	0	13	0	0	0	0	6	0
d__Bacteria	k__norank	p__Firmicutes	c__Clostridia	o__Clostridiales	f__Ruminococcaceae	g__Ruminococcaceae_UCG-009	s__uncultured_bacterium_g__Ruminococcaceae_UCG-009	OTU30	1	0	3	1	1	27	4	9	20	1	0	8
d__Bacteria	k__norank	p__Firmicutes	c__Clostridia	o__Clostridiales	f__Ruminococcaceae	g__Ruminococcus_1	s__unclassified_g__Ruminococcus_1	OTU251	0	0	1	3	0	0	0	1	11	0	0	0
d__Bacteria	k__norank	p__Firmicutes	c__Clostridia	o__Clostridiales	f__Ruminococcaceae	g__Butyricicoccus	s__unclassified_g__Butyricicoccus	OTU287	0	0	2	0	0	0	1	3	1	39	0	0
d__Bacteria	k__norank	p__Bacteroidetes	c__Bacteroidia	o__Bacteroidales	f__Bacteroidales_S24-7_group	g__norank_f__Bacteroidales_S24-7_group	s__uncultured_bacterium_g__norank_f__Bacteroidales_S24-7_group	OTU643	2	8	28	126	0	25	105	26	162	16	1	71
d__Bacteria	k__norank	p__Firmicutes	c__unclassified_p__Firmicutes	o__unclassified_p__Firmicutes	f__unclassified_p__Firmicutes	g__unclassified_p__Firmicutes	s__unclassified_p__Firmicutes	OTU7	44	1	10	12	15	0	1	0	0	2	1	62
d__Bacteria	k__norank	p__Firmicutes	c__Clostridia	o__Clostridiales	f__Lachnospiraceae	g__unclassified_f__Lachnospiraceae	s__unclassified_f__Lachnospiraceae	OTU301	1	1	1	0	0	0	25	8	28	50	0	7
d__Bacteria	k__norank	p__Firmicutes	c__Clostridia	o__Clostridiales	f__Ruminococcaceae	g__Anaerotruncus	s__uncultured_organism_g__Anaerotruncus	OTU719	0	0	0	0	0	0	0	0	0	0	0	0
d__Bacteria	k__norank	p__Firmicutes	c__unclassified_p__Firmicutes	o__unclassified_p__Firmicutes	f__unclassified_p__Firmicutes	g__unclassified_p__Firmicutes	s__unclassified_p__Firmicutes	OTU323	32	1	19	6	11	3	0	1	1	3	77	2
d__Bacteria	k__norank	p__Firmicutes	c__Clostridia	o__Clostridiales	f__Peptococcaceae	g__Peptococcus	s__uncultured_bacterium_g__Peptococcus	OTU514	1	0	2	4	0	19	23	28	21	1	1	2
d__Bacteria	k__norank	p__Tenericutes	c__Mollicutes	o__Mollicutes_RF9	f__norank_o__Mollicutes_RF9	g__norank_o__Mollicutes_RF9	s__unclassified_g__norank_o__Mollicutes_RF9	OTU232	0	0	0	0	0	1	2	0	0	0	1	0
d__Bacteria	k__norank	p__Firmicutes	c__Clostridia	o__Clostridiales	f__Lachnospiraceae	g__unclassified_f__Lachnospiraceae	s__unclassified_f__Lachnospiraceae	OTU705	0	0	0	0	0	3	0	1	0	0	0	0
d__Bacteria	k__norank	p__Proteobacteria	c__Alphaproteobacteria	o__Rhodospirillales	f__Rhodospirillaceae	g__norank_f__Rhodospirillaceae	s__unclassified_g__norank_f__Rhodospirillaceae	OTU348	0	0	0	0	0	3	0	0	4	0	0	1
d__Bacteria	k__norank	p__Firmicutes	c__Clostridia	o__Clostridiales	f__Lachnospiraceae	g__unclassified_f__Lachnospiraceae	s__unclassified_f__Lachnospiraceae	OTU380	0	0	14	0	0	0	0	0	4	4	0	6
d__Bacteria	k__norank	p__Firmicutes	c__Clostridia	o__Clostridiales	f__Ruminococcaceae	g__Ruminococcaceae_UCG-014	s__unclassified_g__Ruminococcaceae_UCG-014	OTU303	2	1	8	26	0	4	15	6	2	31	1	6
d__Bacteria	k__norank	p__Bacteroidetes	c__Bacteroidia	o__Bacteroidales	f__Bacteroidales_S24-7_group	g__norank_f__Bacteroidales_S24-7_group	s__uncultured_bacterium_g__norank_f__Bacteroidales_S24-7_group	OTU241	2	6	69	22	9	148	91	123	13	30	3	113
d__Bacteria	k__norank	p__Bacteroidetes	c__Bacteroidia	o__Bacteroidales	f__Bacteroidales_S24-7_group	g__norank_f__Bacteroidales_S24-7_group	s__uncultured_bacterium_g__norank_f__Bacteroidales_S24-7_group	OTU246	0	0	4	0	0	0	4	0	43	0	0	0
d__Bacteria	k__norank	p__Bacteroidetes	c__Bacteroidia	o__Bacteroidales	f__Bacteroidales_S24-7_group	g__norank_f__Bacteroidales_S24-7_group	s__uncultured_bacterium_g__norank_f__Bacteroidales_S24-7_group	OTU245	1	9	6	25	12	2	20	16	14	3	4	21
d__Bacteria	k__norank	p__Bacteroidetes	c__Bacteroidia	o__Bacteroidales	f__Bacteroidales_S24-7_group	g__norank_f__Bacteroidales_S24-7_group	s__unclassified_g__norank_f__Bacteroidales_S24-7_group	OTU131	0	0	0	0	63	49	0	0	0	0	0	0
d__Bacteria	k__norank	p__Bacteroidetes	c__Bacteroidia	o__Bacteroidales	f__Bacteroidales_S24-7_group	g__norank_f__Bacteroidales_S24-7_group	s__uncultured_bacterium_g__norank_f__Bacteroidales_S24-7_group	OTU363	0	2	0	0	0	28	6	7	4	0	0	2
d__Bacteria	k__norank	p__Bacteroidetes	c__Bacteroidia	o__Bacteroidales	f__Bacteroidales_S24-7_group	g__norank_f__Bacteroidales_S24-7_group	s__uncultured_bacterium_g__norank_f__Bacteroidales_S24-7_group	OTU362	1	31	4	19	5	26	46	21	25	6	1	22
d__Bacteria	k__norank	p__Firmicutes	c__Erysipelotrichia	o__Erysipelotrichales	f__Erysipelotrichaceae	g__unclassified_f__Erysipelotrichaceae	s__unclassified_f__Erysipelotrichaceae	OTU423	0	0	0	4	0	0	0	0	0	0	0	0
d__Bacteria	k__norank	p__Firmicutes	c__Clostridia	o__Clostridiales	f__Lachnospiraceae	g__norank_f__Lachnospiraceae	s__uncultured_bacterium_g__norank_f__Lachnospiraceae	OTU612	0	0	0	0	0	1	0	1	4	0	0	0
d__Bacteria	k__norank	p__unclassified_k__norank	c__unclassified_k__norank	o__unclassified_k__norank	f__unclassified_k__norank	g__unclassified_k__norank	s__unclassified_k__norank	OTU513	0	0	0	0	0	0	0	0	0	0	0	0
d__Bacteria	k__norank	p__Firmicutes	c__Clostridia	o__Clostridiales	f__Lachnospiraceae	g__unclassified_f__Lachnospiraceae	s__unclassified_f__Lachnospiraceae	OTU274	0	0	0	0	0	1	34	11	9	5	2	0
d__Bacteria	k__norank	p__Firmicutes	c__Clostridia	o__Clostridiales	f__Lachnospiraceae	g__unclassified_f__Lachnospiraceae	s__unclassified_f__Lachnospiraceae	OTU270	0	0	0	0	0	1	2	0	6	1	0	0
d__Bacteria	k__norank	p__Firmicutes	c__Clostridia	o__Clostridiales	f__Lachnospiraceae	g__unclassified_f__Lachnospiraceae	s__unclassified_f__Lachnospiraceae	OTU376	0	0	1	0	0	0	2	0	0	2	0	0
d__Bacteria	k__norank	p__Firmicutes	c__Clostridia	o__Clostridiales	f__Lachnospiraceae	g__norank_f__Lachnospiraceae	s__unclassified_g__norank_f__Lachnospiraceae	OTU284	0	1	8	1	0	10	18	12	34	50	0	9
d__Bacteria	k__norank	p__Firmicutes	c__Clostridia	o__Clostridiales	f__Lachnospiraceae	g__unclassified_f__Lachnospiraceae	s__unclassified_f__Lachnospiraceae	OTU372	0	0	0	0	0	0	114	0	40	1	0	3
d__Bacteria	k__norank	p__Firmicutes	c__Clostridia	o__Clostridiales	f__Lachnospiraceae	g__unclassified_f__Lachnospiraceae	s__unclassified_f__Lachnospiraceae	OTU679	2	16	5	1	1	927	24	8	25	190	1	0
d__Bacteria	k__norank	p__Firmicutes	c__Clostridia	o__Clostridiales	f__Ruminococcaceae	g__unclassified_f__Ruminococcaceae	s__unclassified_f__Ruminococcaceae	OTU283	0	2	25	6	14	26	23	42	32	248	7	54
d__Bacteria	k__norank	p__Firmicutes	c__Clostridia	o__Clostridiales	f__Lachnospiraceae	g__Lachnospiraceae_UCG-001	s__unclassified_g__Lachnospiraceae_UCG-001	OTU695	0	0	0	0	0	0	0	4	1	16	0	1
d__Bacteria	k__norank	p__Firmicutes	c__Clostridia	o__Clostridiales	f__Ruminococcaceae	g__Anaerotruncus	s__unclassified_g__Anaerotruncus	OTU361	0	0	0	1	0	0	2	0	0	1	0	1
d__Bacteria	k__norank	p__Firmicutes	c__Clostridia	o__Clostridiales	f__Ruminococcaceae	g__[Eubacterium]_coprostanoligenes_group	s__uncultured_bacterium_g__[Eubacterium]_coprostanoligenes_group	OTU657	0	0	0	5	1	2	0	0	0	0	0	0
d__Bacteria	k__norank	p__Bacteroidetes	c__Bacteroidia	o__Bacteroidales	f__Porphyromonadaceae	g__Barnesiella	s__uncultured_organism_g__Barnesiella	OTU107	0	7	6	5	0	8	8	0	11	2	7	3
d__Bacteria	k__norank	p__Firmicutes	c__Clostridia	o__Clostridiales	f__Ruminococcaceae	g__[Eubacterium]_coprostanoligenes_group	s__uncultured_bacterium_g__[Eubacterium]_coprostanoligenes_group	OTU21	122	330	152	14	576	319	293	1	2	337	322	0
d__Bacteria	k__norank	p__Firmicutes	c__Erysipelotrichia	o__Erysipelotrichales	f__Erysipelotrichaceae	g__unclassified_f__Erysipelotrichaceae	s__unclassified_f__Erysipelotrichaceae	OTU229	0	0	3	2	2	3	3	6	3	0	0	1
d__Bacteria	k__norank	p__Firmicutes	c__Clostridia	o__Clostridiales	f__Lachnospiraceae	g__unclassified_f__Lachnospiraceae	s__unclassified_f__Lachnospiraceae	OTU17	0	6	0	0	2	4	49	21	50	1	1	4
d__Bacteria	k__norank	p__Firmicutes	c__Clostridia	o__Clostridiales	f__Family_XIII	g__Family_XIII_AD3011_group	s__unclassified_g__Family_XIII_AD3011_group	OTU330	1	1	0	8	12	3	11	3	5	3	8	1
d__Bacteria	k__norank	p__Firmicutes	c__Clostridia	o__Clostridiales	f__Ruminococcaceae	g__Ruminiclostridium_6	s__uncultured_bacterium_g__Ruminiclostridium_6	OTU51	0	0	118	1	3	28	25	1	29	23	0	2
d__Bacteria	k__norank	p__Firmicutes	c__Clostridia	o__Clostridiales	f__Ruminococcaceae	g__[Eubacterium]_coprostanoligenes_group	s__uncultured_Clostridium_sp._g__[Eubacterium]_coprostanoligenes_group	OTU32	9	3	0	6	2	3	9	0	4	5	1	5
d__Bacteria	k__norank	p__Firmicutes	c__Clostridia	o__Clostridiales	f__Ruminococcaceae	g__Ruminiclostridium_6	s__uncultured_bacterium_g__Ruminiclostridium_6	OTU666	1	0	0	0	1	1	6	22	0	3	0	2
d__Bacteria	k__norank	p__Firmicutes	c__Bacilli	o__Lactobacillales	f__Lactobacillaceae	g__Lactobacillus	s__unclassified_g__Lactobacillus	OTU543	74	1694	132	569	492	530	564	806	139	276	181	16
d__Bacteria	k__norank	p__Firmicutes	c__Clostridia	o__Clostridiales	f__Ruminococcaceae	g__Ruminiclostridium	s__uncultured_bacterium_g__Ruminiclostridium	OTU191	0	0	6	1	0	16	11	10	26	5	0	2
d__Bacteria	k__norank	p__Firmicutes	c__Bacilli	o__Bacillales	f__Bacillaceae	g__norank_f__Bacillaceae	s__uncultured_bacterium_g__norank_f__Bacillaceae	OTU741	0	0	0	0	0	0	0	0	0	0	0	0
d__Bacteria	k__norank	p__Firmicutes	c__unclassified_p__Firmicutes	o__unclassified_p__Firmicutes	f__unclassified_p__Firmicutes	g__unclassified_p__Firmicutes	s__unclassified_p__Firmicutes	OTU638	13	17	0	2	6	0	0	5	0	7	0	4
d__Bacteria	k__norank	p__Bacteroidetes	c__Bacteroidia	o__Bacteroidales	f__Bacteroidaceae	g__Bacteroides	s__Bacteroides_caccae	OTU207	1	11	5	1	1	10	3	45	7	17	3	1
d__Bacteria	k__norank	p__Firmicutes	c__Bacilli	o__Lactobacillales	f__Lactobacillaceae	g__Lactobacillus	s__unclassified_g__Lactobacillus	OTU548	137	336	761	196	65	14	63	5	33	11	14	50
d__Bacteria	k__norank	p__Firmicutes	c__Clostridia	o__Clostridiales	f__Ruminococcaceae	g__unclassified_f__Ruminococcaceae	s__unclassified_f__Ruminococcaceae	OTU470	2	1	1	2	1	0	6	1	1	10	1	3
d__Bacteria	k__norank	p__Firmicutes	c__Clostridia	o__Clostridiales	f__Ruminococcaceae	g__norank_f__Ruminococcaceae	s__unclassified_g__norank_f__Ruminococcaceae	OTU533	1	4	18	1	1	20	38	8	16	81	1	12
d__Bacteria	k__norank	p__Bacteroidetes	c__Bacteroidia	o__Bacteroidales	f__Bacteroidales_S24-7_group	g__norank_f__Bacteroidales_S24-7_group	s__uncultured_Bacteroidales_bacterium_g__norank_f__Bacteroidales_S24-7_group	OTU633	0	1	8	3	1	60	82	33	37	11	5	18
d__Bacteria	k__norank	p__Bacteroidetes	c__Bacteroidia	o__Bacteroidales	f__Bacteroidales_S24-7_group	g__norank_f__Bacteroidales_S24-7_group	s__unclassified_g__norank_f__Bacteroidales_S24-7_group	OTU149	0	0	0	0	0	9	18	20	1	1	1	5
d__Bacteria	k__norank	p__Firmicutes	c__Clostridia	o__Clostridiales	f__Peptococcaceae	g__norank_f__Peptococcaceae	s__unclassified_g__norank_f__Peptococcaceae	OTU231	0	0	0	1	0	0	29	21	0	10	0	4
d__Bacteria	k__norank	p__Fusobacteria	c__Fusobacteriia	o__Fusobacteriales	f__Fusobacteriaceae	g__Fusobacterium	s__Fusobacterium_russii	OTU459	0	0	0	0	0	0	0	0	0	0	0	0
d__Bacteria	k__norank	p__Bacteroidetes	c__Bacteroidia	o__Bacteroidales	f__Porphyromonadaceae	g__unclassified_f__Porphyromonadaceae	s__unclassified_f__Porphyromonadaceae	OTU114	0	2	10	4	2	3	7	5	8	17	1	6
d__Bacteria	k__norank	p__Firmicutes	c__Clostridia	o__Clostridiales	f__Ruminococcaceae	g__Ruminiclostridium	s__uncultured_bacterium_g__Ruminiclostridium	OTU269	0	1	6	0	0	2	9	6	15	17	1	1
d__Bacteria	k__norank	p__Firmicutes	c__Clostridia	o__Clostridiales	f__Family_XIII	g__Family_XIII_AD3011_group	s__uncultured_Clostridiales_bacterium_g__Family_XIII_AD3011_group	OTU332	2	2	3	3	6	3	10	10	1	4	5	5
d__Bacteria	k__norank	p__Firmicutes	c__Clostridia	o__Clostridiales	f__Ruminococcaceae	g__Ruminiclostridium_5	s__uncultured_Clostridiales_bacterium_g__Ruminiclostridium_5	OTU701	1	2	7	0	1	0	0	0	1	3	0	0
d__Bacteria	k__norank	p__Firmicutes	c__Clostridia	o__Clostridiales	f__Lachnospiraceae	g__unclassified_f__Lachnospiraceae	s__unclassified_f__Lachnospiraceae	OTU407	1	0	21	41	3	1	2	60	0	40	16	46
d__Bacteria	k__norank	p__Tenericutes	c__Mollicutes	o__Mollicutes_RF9	f__norank_o__Mollicutes_RF9	g__norank_o__Mollicutes_RF9	s__uncultured_bacterium_g__norank_o__Mollicutes_RF9	OTU585	0	11	0	0	0	0	0	0	0	0	0	0
d__Bacteria	k__norank	p__Firmicutes	c__Bacilli	o__Bacillales	f__Staphylococcaceae	g__Staphylococcus	s__Staphylococcus_nepalensis	OTU28	20	178	0	2	2	0	1	1	0	2	0	0
d__Bacteria	k__norank	p__Firmicutes	c__Clostridia	o__Clostridiales	f__Lachnospiraceae	g__[Bacteroides]_pectinophilus_group	s__unclassified_g__[Bacteroides]_pectinophilus_group	OTU477	2	5	153	4	6	3	0	14	6	119	2	1
d__Bacteria	k__norank	p__Proteobacteria	c__Gammaproteobacteria	o__Pseudomonadales	f__Pseudomonadaceae	g__Pseudomonas	s__unclassified_g__Pseudomonas	OTU773	0	0	0	0	0	0	0	0	0	0	0	0
d__Bacteria	k__norank	p__Proteobacteria	c__Gammaproteobacteria	o__Pseudomonadales	f__Pseudomonadaceae	g__Pseudomonas	s__unclassified_g__Pseudomonas	OTU775	0	0	0	0	1	0	0	0	0	0	0	0
d__Bacteria	k__norank	p__Actinobacteria	c__Actinobacteria	o__Coriobacteriales	f__Coriobacteriaceae	g__Senegalimassilia	s__uncultured_bacterium_g__Senegalimassilia	OTU325	6	7	16	4	13	0	5	2	3	15	12	6
d__Bacteria	k__norank	p__Firmicutes	c__Clostridia	o__Clostridiales	f__Christensenellaceae	g__norank_f__Christensenellaceae	s__uncultured_bacterium_g__norank_f__Christensenellaceae	OTU25	0	2	3	2	3	4	5	5	4	3	1	1
d__Bacteria	k__norank	p__Bacteroidetes	c__Bacteroidia	o__Bacteroidales	f__Rikenellaceae	g__Alistipes	s__uncultured_bacterium_g__Alistipes	OTU198	0	3	2	4	1	9	8	8	10	0	0	4
d__Bacteria	k__norank	p__Firmicutes	c__Clostridia	o__Clostridiales	f__Lachnospiraceae	g__Lachnospiraceae_NK4A136_group	s__uncultured_bacterium_g__Lachnospiraceae_NK4A136_group	OTU468	0	0	9	3	1	16	17	15	10	6	0	6
d__Bacteria	k__norank	p__Bacteroidetes	c__Bacteroidia	o__Bacteroidales	f__Bacteroidales_S24-7_group	g__norank_f__Bacteroidales_S24-7_group	s__uncultured_bacterium_g__norank_f__Bacteroidales_S24-7_group	OTU516	0	16	7	7	2	75	59	7	21	0	4	62
d__Bacteria	k__norank	p__Bacteroidetes	c__Bacteroidia	o__Bacteroidales	f__Bacteroidales_S24-7_group	g__norank_f__Bacteroidales_S24-7_group	s__uncultured_bacterium_g__norank_f__Bacteroidales_S24-7_group	OTU699	0	2	7	19	6	20	20	32	26	9	6	8
d__Bacteria	k__norank	p__Bacteroidetes	c__Bacteroidia	o__Bacteroidales	f__Bacteroidales_S24-7_group	g__norank_f__Bacteroidales_S24-7_group	s__uncultured_bacterium_g__norank_f__Bacteroidales_S24-7_group	OTU698	6	28	69	76	38	60	191	183	111	149	39	78
d__Bacteria	k__norank	p__Bacteroidetes	c__Bacteroidia	o__Bacteroidales	f__Bacteroidales_S24-7_group	g__norank_f__Bacteroidales_S24-7_group	s__uncultured_bacterium_g__norank_f__Bacteroidales_S24-7_group	OTU697	0	0	0	0	0	0	0	0	39	45	0	0
d__Bacteria	k__norank	p__Firmicutes	c__Clostridia	o__Clostridiales	f__Family_XIII	g__[Eubacterium]_brachy_group	s__unclassified_g__[Eubacterium]_brachy_group	OTU48	0	0	4	1	0	1	0	0	2	2	0	0
d__Bacteria	k__norank	p__Firmicutes	c__Clostridia	o__Clostridiales	f__Ruminococcaceae	g__Ruminococcaceae_UCG-014	s__uncultured_bacterium_g__Ruminococcaceae_UCG-014	OTU464	82	25	62	27	39	21	43	8	62	19	15	7
d__Bacteria	k__norank	p__Firmicutes	c__Clostridia	o__Clostridiales	f__Ruminococcaceae	g__Ruminococcaceae_UCG-014	s__unclassified_g__Ruminococcaceae_UCG-014	OTU553	0	1	0	3	0	1	0	0	0	2	1	1
d__Bacteria	k__norank	p__Cyanobacteria	c__Cyanobacteria	o__Gastranaerophilales	f__norank_o__Gastranaerophilales	g__norank_o__Gastranaerophilales	s__uncultured_bacterium_g__norank_o__Gastranaerophilales	OTU84	0	0	0	3	0	0	0	0	0	0	1	0
d__Bacteria	k__norank	p__Bacteroidetes	c__Bacteroidia	o__Bacteroidales	f__Bacteroidales_S24-7_group	g__norank_f__Bacteroidales_S24-7_group	s__uncultured_bacterium_g__norank_f__Bacteroidales_S24-7_group	OTU109	0	0	0	2	2	0	0	89	0	30	0	6
d__Bacteria	k__norank	p__Bacteroidetes	c__Bacteroidia	o__Bacteroidales	f__Bacteroidales_S24-7_group	g__norank_f__Bacteroidales_S24-7_group	s__uncultured_bacterium_g__norank_f__Bacteroidales_S24-7_group	OTU108	0	6	5	12	3	45	82	43	34	5	6	25
d__Bacteria	k__norank	p__Firmicutes	c__Clostridia	o__Clostridiales	f__Lachnospiraceae	g__Roseburia	s__unclassified_g__Roseburia	OTU574	0	0	0	0	0	2	5	1	1	2	0	0
d__Bacteria	k__norank	p__Bacteroidetes	c__Bacteroidia	o__Bacteroidales	f__Bacteroidaceae	g__Bacteroides	s__Bacteroides_dorei	OTU212	0	12	7	10	2	18	27	36	7	9	1	4
d__Bacteria	k__norank	p__Firmicutes	c__Clostridia	o__Clostridiales	f__Ruminococcaceae	g__unclassified_f__Ruminococcaceae	s__unclassified_f__Ruminococcaceae	OTU521	0	0	46	102	0	3	12	23	8	8	1	9
d__Bacteria	k__norank	p__Bacteroidetes	c__Bacteroidia	o__Bacteroidales	f__Bacteroidales_S24-7_group	g__norank_f__Bacteroidales_S24-7_group	s__uncultured_bacterium_g__norank_f__Bacteroidales_S24-7_group	OTU453	0	0	0	0	0	0	0	0	0	0	0	0
d__Bacteria	k__norank	p__Bacteroidetes	c__Bacteroidia	o__Bacteroidales	f__Bacteroidales_S24-7_group	g__norank_f__Bacteroidales_S24-7_group	s__uncultured_bacterium_g__norank_f__Bacteroidales_S24-7_group	OTU452	0	16	0	0	0	0	0	0	0	0	0	0
d__Bacteria	k__norank	p__Bacteroidetes	c__Bacteroidia	o__Bacteroidales	f__Bacteroidales_S24-7_group	g__norank_f__Bacteroidales_S24-7_group	s__uncultured_bacterium_g__norank_f__Bacteroidales_S24-7_group	OTU451	0	1	3	2	0	21	18	15	4	1	0	16
d__Bacteria	k__norank	p__Firmicutes	c__Clostridia	o__Clostridiales	f__Ruminococcaceae	g__Ruminococcaceae_UCG-014	s__unclassified_g__Ruminococcaceae_UCG-014	OTU58	1	0	28	2	2	3	5	1	16	0	4	3
d__Bacteria	k__norank	p__Firmicutes	c__Clostridia	o__Clostridiales	f__Ruminococcaceae	g__Ruminococcaceae_UCG-014	s__uncultured_bacterium_g__Ruminococcaceae_UCG-014	OTU37	1	4	20	14	4	5	2	4	21	19	1	6
d__Bacteria	k__norank	p__Firmicutes	c__Clostridia	o__Clostridiales	f__Christensenellaceae	g__Christensenellaceae_R-7_group	s__unclassified_g__Christensenellaceae_R-7_group	OTU31	0	6	7	9	2	6	6	1	3	7	1	1
d__Bacteria	k__norank	p__Firmicutes	c__Clostridia	o__Clostridiales	f__Clostridiales_vadinBB60_group	g__norank_f__Clostridiales_vadinBB60_group	s__uncultured_bacterium_g__norank_f__Clostridiales_vadinBB60_group	OTU264	0	0	0	0	0	0	0	4	0	1	0	0
d__Bacteria	k__norank	p__Firmicutes	c__Clostridia	o__Clostridiales	f__Ruminococcaceae	g__Ruminiclostridium	s__unclassified_g__Ruminiclostridium	OTU572	5	5	57	12	4	205	95	90	162	103	4	27
d__Bacteria	k__norank	p__Firmicutes	c__Clostridia	o__Clostridiales	f__Lachnospiraceae	g__Marvinbryantia	s__uncultured_bacterium_g__Marvinbryantia	OTU675	0	1	5	3	3	15	10	2	18	30	7	1
d__Bacteria	k__norank	p__Actinobacteria	c__Actinobacteria	o__Coriobacteriales	f__Coriobacteriaceae	g__Enterorhabdus	s__uncultured_bacterium_g__Enterorhabdus	OTU334	3	1	12	2	3	0	2	6	0	4	29	0
d__Bacteria	k__norank	p__Firmicutes	c__Clostridia	o__Clostridiales	f__Ruminococcaceae	g__Ruminococcaceae_UCG-014	s__uncultured_bacterium_g__Ruminococcaceae_UCG-014	OTU267	0	0	0	0	0	3	0	0	0	3	6	0
d__Bacteria	k__norank	p__Firmicutes	c__Clostridia	o__Clostridiales	f__Ruminococcaceae	g__Butyricicoccus	s__unclassified_g__Butyricicoccus	OTU475	0	0	6	0	0	11	8	1	7	23	0	0
d__Bacteria	k__norank	p__Cyanobacteria	c__Cyanobacteria	o__Gastranaerophilales	f__norank_o__Gastranaerophilales	g__norank_o__Gastranaerophilales	s__uncultured_bacterium_g__norank_o__Gastranaerophilales	OTU694	0	1	1	1	12	0	0	1	1	0	0	0
d__Bacteria	k__norank	p__Firmicutes	c__Clostridia	o__Clostridiales	f__Lachnospiraceae	g__unclassified_f__Lachnospiraceae	s__unclassified_f__Lachnospiraceae	OTU608	0	0	1	2	0	0	9	37	14	58	1	5
d__Bacteria	k__norank	p__Firmicutes	c__Clostridia	o__Clostridiales	f__Christensenellaceae	g__Christensenellaceae_R-7_group	s__unclassified_g__Christensenellaceae_R-7_group	OTU396	0	0	1	1	0	1	1	1	0	1	0	1
d__Bacteria	k__norank	p__Firmicutes	c__Clostridia	o__Clostridiales	f__Lachnospiraceae	g__norank_f__Lachnospiraceae	s__uncultured_bacterium_g__norank_f__Lachnospiraceae	OTU146	1	0	1	8	6	38	28	66	26	12	2	16
d__Bacteria	k__norank	p__Firmicutes	c__Clostridia	o__Clostridiales	f__Lachnospiraceae	g__norank_f__Lachnospiraceae	s__uncultured_bacterium_g__norank_f__Lachnospiraceae	OTU145	0	0	1	1	0	33	4	3	1	0	0	0
d__Bacteria	k__norank	p__Firmicutes	c__Clostridia	o__Clostridiales	f__Lachnospiraceae	g__[Eubacterium]_ventriosum_group	s__uncultured_organism_g__[Eubacterium]_ventriosum_group	OTU458	9	23	0	20	23	7	24	9	28	9	5	2
d__Bacteria	k__norank	p__Bacteroidetes	c__Bacteroidia	o__Bacteroidales	f__Bacteroidales_S24-7_group	g__norank_f__Bacteroidales_S24-7_group	s__uncultured_bacterium_g__norank_f__Bacteroidales_S24-7_group	OTU393	0	3	0	4	2	0	6	0	3	0	1	4
d__Bacteria	k__norank	p__Firmicutes	c__Clostridia	o__Clostridiales	f__Clostridiales_vadinBB60_group	g__norank_f__Clostridiales_vadinBB60_group	s__unclassified_g__norank_f__Clostridiales_vadinBB60_group	OTU327	1	0	1	10	1	5	6	13	4	2	15	5
d__Bacteria	k__norank	p__Bacteroidetes	c__Bacteroidia	o__Bacteroidales	f__Bacteroidales_S24-7_group	g__norank_f__Bacteroidales_S24-7_group	s__uncultured_bacterium_g__norank_f__Bacteroidales_S24-7_group	OTU350	0	0	5	0	0	0	1	0	0	0	0	37
d__Bacteria	k__norank	p__Bacteroidetes	c__Bacteroidia	o__Bacteroidales	f__Bacteroidales_S24-7_group	g__norank_f__Bacteroidales_S24-7_group	s__uncultured_bacterium_g__norank_f__Bacteroidales_S24-7_group	OTU353	1	0	29	17	3	36	55	129	6	6	12	38
d__Bacteria	k__norank	p__Bacteroidetes	c__Bacteroidia	o__Bacteroidales	f__Bacteroidales_S24-7_group	g__norank_f__Bacteroidales_S24-7_group	s__uncultured_bacterium_g__norank_f__Bacteroidales_S24-7_group	OTU355	0	10	0	0	7	0	0	0	0	130	0	46
d__Bacteria	k__norank	p__Bacteroidetes	c__Bacteroidia	o__Bacteroidales	f__Prevotellaceae	g__Alloprevotella	s__uncultured_bacterium_g__Alloprevotella	OTU176	3	2	37	505	0	125	1129	0	443	0	3	215
d__Bacteria	k__norank	p__Firmicutes	c__Clostridia	o__Clostridiales	f__Ruminococcaceae	g__Ruminococcaceae_UCG-010	s__unclassified_g__Ruminococcaceae_UCG-010	OTU620	0	1	1	1	3	7	12	16	5	9	2	2
d__Bacteria	k__norank	p__Tenericutes	c__Mollicutes	o__Mollicutes_RF9	f__norank_o__Mollicutes_RF9	g__norank_o__Mollicutes_RF9	s__unclassified_g__norank_o__Mollicutes_RF9	OTU379	3	0	2	1	0	0	3	1	1	0	0	0
d__Bacteria	k__norank	p__Firmicutes	c__Clostridia	o__Clostridiales	f__Ruminococcaceae	g__Ruminococcus_1	s__unclassified_g__Ruminococcus_1	OTU689	0	5	0	14	0	104	24	11	30	0	1	0
d__Bacteria	k__norank	p__Firmicutes	c__Clostridia	o__Clostridiales	f__Lachnospiraceae	g__Lachnospiraceae_UCG-006	s__uncultured_bacterium_g__Lachnospiraceae_UCG-006	OTU422	0	2	9	3	0	11	28	3	19	59	3	2
d__Bacteria	k__norank	p__Firmicutes	c__Clostridia	o__Clostridiales	f__Lachnospiraceae	g__norank_f__Lachnospiraceae	s__unclassified_g__norank_f__Lachnospiraceae	OTU578	2	1	8	5	2	65	28	30	56	108	1	18
d__Bacteria	k__norank	p__Firmicutes	c__Bacilli	o__Lactobacillales	f__Lactobacillaceae	g__Lactobacillus	s__unclassified_g__Lactobacillus	OTU647	1	102	3	10	17	1	5	0	0	9	1	2
d__Bacteria	k__norank	p__Firmicutes	c__Clostridia	o__Clostridiales	f__Ruminococcaceae	g__Ruminococcaceae_UCG-007	s__uncultured_rumen_bacterium_g__Ruminococcaceae_UCG-007	OTU278	2	2	7	1	1	5	3	1	3	3	1	2
d__Bacteria	k__norank	p__Firmicutes	c__Bacilli	o__Lactobacillales	f__Lactobacillaceae	g__Lactobacillus	s__unclassified_g__Lactobacillus	OTU641	122	1	22	26	49	0	2	1	2	4	8	118
d__Bacteria	k__norank	p__Tenericutes	c__Mollicutes	o__Mollicutes_RF9	f__norank_o__Mollicutes_RF9	g__norank_o__Mollicutes_RF9	s__uncultured_bacterium_g__norank_o__Mollicutes_RF9	OTU525	0	0	0	0	0	0	0	0	0	0	0	0
d__Bacteria	k__norank	p__Firmicutes	c__Clostridia	o__Clostridiales	f__Ruminococcaceae	g__Ruminococcaceae_UCG-014	s__unclassified_g__Ruminococcaceae_UCG-014	OTU463	4	44	56	1110	55	43	49	5	6	29	75	15
d__Bacteria	k__norank	p__Firmicutes	c__Clostridia	o__Clostridiales	f__Lachnospiraceae	g__Roseburia	s__uncultured_bacterium_g__Roseburia	OTU300	0	0	0	0	3	0	5	4	2	20	0	0
d__Bacteria	k__norank	p__Firmicutes	c__Clostridia	o__Clostridiales	f__Lachnospiraceae	g__unclassified_f__Lachnospiraceae	s__unclassified_f__Lachnospiraceae	OTU702	0	0	1	0	1	1	1	0	1	6	0	2
d__Bacteria	k__norank	p__Firmicutes	c__Clostridia	o__Clostridiales	f__Clostridiales_vadinBB60_group	g__norank_f__Clostridiales_vadinBB60_group	s__unclassified_g__norank_f__Clostridiales_vadinBB60_group	OTU717	0	0	0	1	0	1	0	0	2	0	0	0
d__Bacteria	k__norank	p__Firmicutes	c__Clostridia	o__Clostridiales	f__Lachnospiraceae	g__unclassified_f__Lachnospiraceae	s__unclassified_f__Lachnospiraceae	OTU704	0	0	0	0	0	0	0	234	0	41	0	2
d__Bacteria	k__norank	p__Firmicutes	c__Clostridia	o__Clostridiales	f__Lachnospiraceae	g__unclassified_f__Lachnospiraceae	s__unclassified_f__Lachnospiraceae	OTU708	0	0	0	0	0	5	0	0	0	0	0	0
d__Bacteria	k__norank	p__Firmicutes	c__Clostridia	o__Clostridiales	f__Peptococcaceae	g__norank_f__Peptococcaceae	s__uncultured_bacterium_g__norank_f__Peptococcaceae	OTU238	0	0	0	0	0	1	2	11	1	0	0	0
d__Bacteria	k__norank	p__Firmicutes	c__Clostridia	o__Clostridiales	f__Lachnospiraceae	g__unclassified_f__Lachnospiraceae	s__unclassified_f__Lachnospiraceae	OTU631	0	1	5	0	4	2	38	4	5	81	0	5
d__Bacteria	k__norank	p__Actinobacteria	c__Actinobacteria	o__Coriobacteriales	f__Coriobacteriaceae	g__unclassified_f__Coriobacteriaceae	s__unclassified_f__Coriobacteriaceae	OTU545	1	1	1	0	1	0	0	2	0	1	2	1
d__Bacteria	k__norank	p__Firmicutes	c__Clostridia	o__Clostridiales	f__Lachnospiraceae	g__unclassified_f__Lachnospiraceae	s__unclassified_f__Lachnospiraceae	OTU632	0	0	1	0	0	35	3	2	14	1	0	0
d__Bacteria	k__norank	p__Firmicutes	c__Clostridia	o__Clostridiales	f__Lachnospiraceae	g__Acetatifactor	s__uncultured_bacterium_g__Acetatifactor	OTU406	0	0	0	1	0	3	21	28	10	17	0	1
d__Bacteria	k__norank	p__Bacteroidetes	c__Bacteroidia	o__Bacteroidales	f__Prevotellaceae	g__Prevotellaceae_UCG-001	s__uncultured_bacterium_g__Prevotellaceae_UCG-001	OTU201	3	37	69	548	1	71	370	538	922	82	5	88
d__Bacteria	k__norank	p__Bacteroidetes	c__Bacteroidia	o__Bacteroidales	f__Porphyromonadaceae	g__Odoribacter	s__uncultured_bacterium_g__Odoribacter	OTU29	0	3	7	6	1	3	23	39	0	7	0	12
d__Bacteria	k__norank	p__Firmicutes	c__Clostridia	o__Clostridiales	f__Lachnospiraceae	g__Lachnospiraceae_UCG-001	s__uncultured_bacterium_g__Lachnospiraceae_UCG-001	OTU673	0	0	0	0	0	3	1	0	0	0	0	0
d__Bacteria	k__norank	p__Firmicutes	c__Clostridia	o__Clostridiales	f__Lachnospiraceae	g__Coprococcus_1	s__unclassified_g__Coprococcus_1	OTU629	0	0	0	0	0	2	8	11	7	11	1	2
d__Bacteria	k__norank	p__Firmicutes	c__Clostridia	o__Clostridiales	f__unclassified_o__Clostridiales	g__unclassified_o__Clostridiales	s__unclassified_o__Clostridiales	OTU38	2	1	37	5	3	5	3	10	2	3	7	5
d__Bacteria	k__norank	p__Firmicutes	c__Clostridia	o__Clostridiales	f__Clostridiales_vadinBB60_group	g__norank_f__Clostridiales_vadinBB60_group	s__unclassified_g__norank_f__Clostridiales_vadinBB60_group	OTU391	0	1	5	1	4	8	1	1	3	9	1	1
d__Bacteria	k__norank	p__Firmicutes	c__Erysipelotrichia	o__Erysipelotrichales	f__Erysipelotrichaceae	g__Turicibacter	s__Turicibacter_sp._LA61	OTU509	214	1	61	37	62	9	2	34	3	17	116	61
d__Bacteria	k__norank	p__Firmicutes	c__Clostridia	o__Clostridiales	f__Ruminococcaceae	g__unclassified_f__Ruminococcaceae	s__unclassified_f__Ruminococcaceae	OTU703	0	0	1	0	0	5	5	5	5	3	0	0
d__Bacteria	k__norank	p__Firmicutes	c__Clostridia	o__Clostridiales	f__Lachnospiraceae	g__Lachnospiraceae_NK4A136_group	s__unclassified_g__Lachnospiraceae_NK4A136_group	OTU566	0	0	1	0	0	1	0	2	1	2	0	0
d__Bacteria	k__norank	p__Firmicutes	c__Erysipelotrichia	o__Erysipelotrichales	f__Erysipelotrichaceae	g__norank_f__Erysipelotrichaceae	s__unclassified_g__norank_f__Erysipelotrichaceae	OTU742	0	0	0	0	0	0	0	0	0	0	0	0
d__Bacteria	k__norank	p__Bacteroidetes	c__Bacteroidia	o__Bacteroidales	f__Porphyromonadaceae	g__Butyricimonas	s__Butyricimonas_virosa	OTU180	0	0	1	3	0	1	7	8	0	0	3	1
d__Bacteria	k__norank	p__Firmicutes	c__Clostridia	o__Clostridiales	f__Peptococcaceae	g__norank_f__Peptococcaceae	s__unclassified_g__norank_f__Peptococcaceae	OTU563	0	6	12	21	1	3	4	7	4	4	5	3
d__Bacteria	k__norank	p__Bacteroidetes	c__Bacteroidia	o__Bacteroidales	f__Rikenellaceae	g__Alistipes	s__Alistipes_shahii	OTU210	0	0	2	1	0	0	1	0	1	0	0	0
d__Bacteria	k__norank	p__Firmicutes	c__Clostridia	o__Clostridiales	f__Lachnospiraceae	g__norank_f__Lachnospiraceae	s__unclassified_g__norank_f__Lachnospiraceae	OTU405	0	1	2	0	0	59	31	20	13	97	0	6
d__Bacteria	k__norank	p__Firmicutes	c__Clostridia	o__Clostridiales	f__Family_XIII	g__unclassified_f__Family_XIII	s__unclassified_f__Family_XIII	OTU148	0	0	0	0	0	2	2	0	2	2	0	2
d__Bacteria	k__norank	p__Firmicutes	c__Clostridia	o__Clostridiales	f__Lachnospiraceae	g__Coprococcus_1	s__unclassified_g__Coprococcus_1	OTU567	1	1	9	0	0	15	11	16	16	12	0	2
d__Bacteria	k__norank	p__Firmicutes	c__Clostridia	o__Clostridiales	f__Ruminococcaceae	g__Ruminiclostridium_6	s__uncultured_bacterium_g__Ruminiclostridium_6	OTU432	1	10	2	0	4	0	15	39	3	7	0	14
d__Bacteria	k__norank	p__Firmicutes	c__Clostridia	o__Clostridiales	f__Ruminococcaceae	g__Ruminiclostridium_9	s__uncultured_bacterium_g__Ruminiclostridium_9	OTU723	0	0	0	0	0	0	1	0	0	2	0	1
d__Bacteria	k__norank	p__Firmicutes	c__Clostridia	o__Clostridiales	f__Lachnospiraceae	g__unclassified_f__Lachnospiraceae	s__unclassified_f__Lachnospiraceae	OTU446	0	0	0	0	0	0	0	0	0	0	0	0
d__Bacteria	k__norank	p__Firmicutes	c__Clostridia	o__Clostridiales	f__Lachnospiraceae	g__norank_f__Lachnospiraceae	s__uncultured_bacterium_g__norank_f__Lachnospiraceae	OTU169	0	0	2	0	0	2	2	0	0	6	0	0
d__Bacteria	k__norank	p__Firmicutes	c__Clostridia	o__Clostridiales	f__unclassified_o__Clostridiales	g__unclassified_o__Clostridiales	s__unclassified_o__Clostridiales	OTU222	0	4	0	1	1	4	3	0	2	0	1	1
d__Bacteria	k__norank	p__Proteobacteria	c__Deltaproteobacteria	o__Desulfovibrionales	f__Desulfovibrionaceae	g__Desulfovibrio	s__unclassified_g__Desulfovibrio	OTU248	26	59	361	73	35	161	36	98	304	36	75	72
d__Bacteria	k__norank	p__Firmicutes	c__Erysipelotrichia	o__Erysipelotrichales	f__Erysipelotrichaceae	g__Erysipelotrichaceae_UCG-003	s__uncultured_bacterium_g__Erysipelotrichaceae_UCG-003	OTU41	0	20	0	0	0	0	0	0	6	0	0	0
d__Bacteria	k__norank	p__Firmicutes	c__Clostridia	o__Clostridiales	f__Lachnospiraceae	g__unclassified_f__Lachnospiraceae	s__unclassified_f__Lachnospiraceae	OTU520	0	0	0	0	1	1	28	5	11	30	0	2
d__Bacteria	k__norank	p__Firmicutes	c__Clostridia	o__Clostridiales	f__Lachnospiraceae	g__unclassified_f__Lachnospiraceae	s__unclassified_f__Lachnospiraceae	OTU523	0	0	0	0	1	0	0	0	0	0	0	0
d__Bacteria	k__norank	p__Firmicutes	c__Clostridia	o__Clostridiales	f__Lachnospiraceae	g__norank_f__Lachnospiraceae	s__unclassified_g__norank_f__Lachnospiraceae	OTU490	0	0	7	2	3	0	4	10	0	89	0	8
d__Bacteria	k__norank	p__Firmicutes	c__Clostridia	o__Clostridiales	f__Lachnospiraceae	g__unclassified_f__Lachnospiraceae	s__unclassified_f__Lachnospiraceae	OTU449	0	9	695	34	11	0	3	254	258	11	1	2
d__Bacteria	k__norank	p__Firmicutes	c__Clostridia	o__Clostridiales	f__Lachnospiraceae	g__Lachnospiraceae_NK4A136_group	s__uncultured_Clostridiales_bacterium_g__Lachnospiraceae_NK4A136_group	OTU155	0	0	0	0	0	456	0	0	0	0	0	0
d__Bacteria	k__norank	p__Bacteroidetes	c__Bacteroidia	o__Bacteroidales	f__Rikenellaceae	g__Alistipes	s__Faecalibacterium_prausnitzii_g__Alistipes	OTU260	0	0	1	1	0	0	0	0	1	0	0	0
d__Bacteria	k__norank	p__Firmicutes	c__Clostridia	o__Clostridiales	f__Clostridiales_vadinBB60_group	g__norank_f__Clostridiales_vadinBB60_group	s__uncultured_bacterium_g__norank_f__Clostridiales_vadinBB60_group	OTU242	0	0	0	0	0	1	0	10	0	0	0	0
d__Bacteria	k__norank	p__Firmicutes	c__Clostridia	o__Clostridiales	f__Lachnospiraceae	g__unclassified_f__Lachnospiraceae	s__unclassified_f__Lachnospiraceae	OTU67	0	1	14	0	0	20	8	10	9	46	0	1
d__Bacteria	k__norank	p__Firmicutes	c__Clostridia	o__Clostridiales	f__Lachnospiraceae	g__Roseburia	s__Lachnospiraceae_bacterium_DW52	OTU153	0	0	0	0	0	74	0	0	0	0	0	0
d__Bacteria	k__norank	p__Firmicutes	c__Clostridia	o__Clostridiales	f__Ruminococcaceae	g__Ruminiclostridium	s__uncultured_bacterium_g__Ruminiclostridium	OTU394	0	0	3	0	0	4	5	4	16	5	0	5
d__Bacteria	k__norank	p__Firmicutes	c__Clostridia	o__Clostridiales	f__Ruminococcaceae	g__Ruminococcaceae_UCG-010	s__uncultured_organism_g__Ruminococcaceae_UCG-010	OTU569	0	2	11	1	1	19	5	33	13	1	1	18
d__Bacteria	k__norank	p__Bacteroidetes	c__Bacteroidia	o__Bacteroidales	f__Bacteroidales_S24-7_group	g__norank_f__Bacteroidales_S24-7_group	s__unclassified_g__norank_f__Bacteroidales_S24-7_group	OTU347	0	0	24	0	0	7	6	22	5	10	0	7
d__Bacteria	k__norank	p__Firmicutes	c__Clostridia	o__Clostridiales	f__Lachnospiraceae	g__Lachnospiraceae_NK4A136_group	s__uncultured_bacterium_g__Lachnospiraceae_NK4A136_group	OTU709	0	4	0	3	1	1	20	19	20	4	0	0
d__Bacteria	k__norank	p__Firmicutes	c__Clostridia	o__Clostridiales	f__Christensenellaceae	g__Catabacter	s__Christensenella_sp._Marseille-P2437	OTU61	0	1	3	0	0	0	0	0	0	0	1	2
d__Bacteria	k__norank	p__Firmicutes	c__Clostridia	o__Clostridiales	f__Ruminococcaceae	g__Ruminococcaceae_UCG-009	s__uncultured_bacterium_g__Ruminococcaceae_UCG-009	OTU279	0	5	2	14	2	0	7	4	9	7	2	5
d__Bacteria	k__norank	p__Bacteroidetes	c__Bacteroidia	o__Bacteroidales	f__Porphyromonadaceae	g__Petrimonas	s__unclassified_g__Petrimonas	OTU752	0	0	0	0	0	0	0	0	0	0	0	0
d__Bacteria	k__norank	p__Actinobacteria	c__Actinobacteria	o__Coriobacteriales	f__Coriobacteriaceae	g__Enterorhabdus	s__uncultured_bacterium_g__Enterorhabdus	OTU357	2	1	5	2	1	0	1	0	0	0	0	3
d__Bacteria	k__norank	p__Actinobacteria	c__Actinobacteria	o__Coriobacteriales	f__Coriobacteriaceae	g__unclassified_f__Coriobacteriaceae	s__unclassified_f__Coriobacteriaceae	OTU99	0	0	0	1	0	0	0	1	0	0	0	0
d__Bacteria	k__norank	p__Bacteroidetes	c__Bacteroidia	o__Bacteroidales	f__Bacteroidaceae	g__Bacteroides	s__Bacteroides_stercoris_ATCC_43183	OTU687	0	0	5	0	0	8	0	26	0	0	0	2
d__Bacteria	k__norank	p__Firmicutes	c__Clostridia	o__Clostridiales	f__Ruminococcaceae	g__Fastidiosipila	s__uncultured_bacterium_g__Fastidiosipila	OTU735	0	0	0	0	0	0	0	0	0	0	0	0
d__Bacteria	k__norank	p__Firmicutes	c__Clostridia	o__Clostridiales	f__Lachnospiraceae	g__norank_f__Lachnospiraceae	s__uncultured_bacterium_g__norank_f__Lachnospiraceae	OTU590	0	0	2	0	0	0	10	15	1	0	0	0
d__Bacteria	k__norank	p__Firmicutes	c__unclassified_p__Firmicutes	o__unclassified_p__Firmicutes	f__unclassified_p__Firmicutes	g__unclassified_p__Firmicutes	s__unclassified_p__Firmicutes	OTU314	3	5	8	10	10	8	4	12	1	9	27	3
d__Bacteria	k__norank	p__Firmicutes	c__Clostridia	o__Clostridiales	f__Ruminococcaceae	g__Ruminococcaceae_UCG-010	s__uncultured_bacterium_g__Ruminococcaceae_UCG-010	OTU378	0	0	0	0	1	6	3	4	0	0	0	1
d__Bacteria	k__norank	p__Firmicutes	c__Clostridia	o__Clostridiales	f__Lachnospiraceae	g__unclassified_f__Lachnospiraceae	s__unclassified_f__Lachnospiraceae	OTU411	0	0	0	0	0	0	0	0	1	26	1	1
d__Bacteria	k__norank	p__Firmicutes	c__Erysipelotrichia	o__Erysipelotrichales	f__Erysipelotrichaceae	g__Holdemania	s__unclassified_g__Holdemania	OTU268	0	1	3	0	0	0	0	0	1	1	0	0
d__Bacteria	k__norank	p__Bacteroidetes	c__Bacteroidia	o__Bacteroidales	f__Bacteroidales_S24-7_group	g__norank_f__Bacteroidales_S24-7_group	s__uncultured_bacterium_g__norank_f__Bacteroidales_S24-7_group	OTU89	2	2	2	23	2	16	38	11	1	0	1	0
d__Bacteria	k__norank	p__Firmicutes	c__Clostridia	o__Clostridiales	f__Ruminococcaceae	g__unclassified_f__Ruminococcaceae	s__unclassified_f__Ruminococcaceae	OTU381	0	0	0	0	0	4	4	1	1	3	0	1
d__Bacteria	k__norank	p__Bacteroidetes	c__Bacteroidia	o__Bacteroidales	f__Prevotellaceae	g__Alloprevotella	s__uncultured_bacterium_g__Alloprevotella	OTU429	2	23	6	7	6	0	1	33	14	0	0	0
d__Bacteria	k__norank	p__Firmicutes	c__Clostridia	o__Clostridiales	f__Ruminococcaceae	g__Ruminococcaceae_UCG-010	s__unclassified_g__Ruminococcaceae_UCG-010	OTU639	0	0	1	0	0	3	0	0	1	0	0	0
d__Bacteria	k__norank	p__Firmicutes	c__Clostridia	o__Clostridiales	f__Peptococcaceae	g__unclassified_f__Peptococcaceae	s__unclassified_f__Peptococcaceae	OTU753	0	0	0	0	0	0	0	0	0	0	0	0
d__Bacteria	k__norank	p__Spirochaetae	c__Spirochaetes	o__Spirochaetales	f__Spirochaetaceae	g__Sphaerochaeta	s__uncultured_bacterium_g__Sphaerochaeta	OTU745	0	0	0	0	0	0	0	0	0	0	0	0
d__Bacteria	k__norank	p__Tenericutes	c__Mollicutes	o__Mollicutes_RF9	f__norank_o__Mollicutes_RF9	g__norank_o__Mollicutes_RF9	s__uncultured_bacterium_g__norank_o__Mollicutes_RF9	OTU236	0	0	0	8	0	0	0	1	0	0	0	0
d__Bacteria	k__norank	p__Bacteroidetes	c__Bacteroidia	o__Bacteroidales	f__Bacteroidales_S24-7_group	g__norank_f__Bacteroidales_S24-7_group	s__unclassified_g__norank_f__Bacteroidales_S24-7_group	OTU129	11	0	21	0	11	34	46	4	26	1	6	104
d__Bacteria	k__norank	p__Firmicutes	c__Clostridia	o__Clostridiales	f__Lachnospiraceae	g__unclassified_f__Lachnospiraceae	s__unclassified_f__Lachnospiraceae	OTU580	0	0	3	3	0	7	8	15	10	20	2	2
d__Bacteria	k__norank	p__Firmicutes	c__Erysipelotrichia	o__Erysipelotrichales	f__Erysipelotrichaceae	g__Erysipelatoclostridium	s__unclassified_g__Erysipelatoclostridium	OTU104	0	2	4	0	0	0	4	1	0	1	2	0
d__Bacteria	k__norank	p__Firmicutes	c__Erysipelotrichia	o__Erysipelotrichales	f__Erysipelotrichaceae	g__Allobaculum	s__uncultured_Allobaculum_sp.	OTU645	0	96	0	0	0	0	0	0	0	0	0	0
d__Bacteria	k__norank	p__Firmicutes	c__Clostridia	o__Clostridiales	f__Ruminococcaceae	g__unclassified_f__Ruminococcaceae	s__unclassified_f__Ruminococcaceae	OTU253	0	0	0	0	0	1	0	1	3	0	1	1
d__Bacteria	k__norank	p__Firmicutes	c__Clostridia	o__Clostridiales	f__Ruminococcaceae	g__Ruminococcaceae_UCG-010	s__gut_metagenome_g__Ruminococcaceae_UCG-010	OTU374	0	0	1	0	4	19	2	7	2	1	0	1
d__Bacteria	k__norank	p__Firmicutes	c__Clostridia	o__Clostridiales	f__Ruminococcaceae	g__Anaerotruncus	s__unclassified_g__Anaerotruncus	OTU724	0	0	0	2	0	17	1	5	7	0	0	0
d__Bacteria	k__norank	p__Proteobacteria	c__Alphaproteobacteria	o__Rhodobacterales	f__Rhodobacteraceae	g__unclassified_f__Rhodobacteraceae	s__unclassified_f__Rhodobacteraceae	OTU746	0	0	0	0	0	0	0	0	0	0	0	0
d__Bacteria	k__norank	p__Firmicutes	c__Clostridia	o__Clostridiales	f__Peptococcaceae	g__norank_f__Peptococcaceae	s__uncultured_organism_g__norank_f__Peptococcaceae	OTU711	0	0	0	1	3	1	8	11	9	0	0	5
d__Bacteria	k__norank	p__Firmicutes	c__Clostridia	o__Clostridiales	f__Lachnospiraceae	g__norank_f__Lachnospiraceae	s__unclassified_g__norank_f__Lachnospiraceae	OTU430	0	0	0	0	0	2	5	1	5	6	0	0
d__Bacteria	k__norank	p__Bacteroidetes	c__Bacteroidia	o__Bacteroidales	f__Prevotellaceae	g__Prevotellaceae_UCG-001	s__uncultured_bacterium_g__Prevotellaceae_UCG-001	OTU105	0	0	2	53	1	48	31	0	56	1	0	4
d__Bacteria	k__norank	p__Firmicutes	c__Clostridia	o__Clostridiales	f__Ruminococcaceae	g__Ruminiclostridium_5	s__uncultured_bacterium_g__Ruminiclostridium_5	OTU712	0	2	0	0	0	0	0	0	3	0	0	0
d__Bacteria	k__norank	p__Firmicutes	c__Clostridia	o__Clostridiales	f__Ruminococcaceae	g__Anaerotruncus	s__unclassified_g__Anaerotruncus	OTU123	0	0	0	0	0	1	4	3	0	0	0	1
d__Bacteria	k__norank	p__Firmicutes	c__Clostridia	o__Clostridiales	f__Ruminococcaceae	g__norank_f__Ruminococcaceae	s__unclassified_g__norank_f__Ruminococcaceae	OTU69	0	0	4	0	0	0	2	0	1	2	0	2
d__Bacteria	k__norank	p__Firmicutes	c__Bacilli	o__Lactobacillales	f__Aerococcaceae	g__Globicatella	s__Globicatella_sp._canine_oral_taxon_218	OTU317	2	10	0	4	1	0	1	0	1	2	8	0
d__Bacteria	k__norank	p__Firmicutes	c__Clostridia	o__Clostridiales	f__Lachnospiraceae	g__Lachnospiraceae_UCG-006	s__uncultured_bacterium_g__Lachnospiraceae_UCG-006	OTU415	0	0	1	0	1	1	3	4	1	19	0	0
d__Bacteria	k__norank	p__Elusimicrobia	c__Elusimicrobia	o__Elusimicrobiales	f__Elusimicrobiaceae	g__Elusimicrobium	s__uncultured_bacterium_g__Elusimicrobium	OTU66	0	1	1	0	0	0	0	0	0	1	0	0
d__Bacteria	k__norank	p__Firmicutes	c__Clostridia	o__Clostridiales	f__Lachnospiraceae	g__Lachnospiraceae_NK4A136_group	s__unclassified_g__Lachnospiraceae_NK4A136_group	OTU530	0	5	252	34	1	567	0	37	375	10	17	0
d__Bacteria	k__norank	p__Firmicutes	c__Clostridia	o__Clostridiales	f__Caldicoprobacteraceae	g__Caldicoprobacter	s__uncultured_prokaryote_g__Caldicoprobacter	OTU757	0	0	0	0	0	0	0	0	0	0	0	0
d__Bacteria	k__norank	p__Proteobacteria	c__Betaproteobacteria	o__Burkholderiales	f__Alcaligenaceae	g__Sutterella	s__unclassified_g__Sutterella	OTU158	0	1	0	0	0	5	0	0	1	0	0	0
d__Bacteria	k__norank	p__Firmicutes	c__Clostridia	o__Clostridiales	f__Lachnospiraceae	g__norank_f__Lachnospiraceae	s__Clostridium_sp._Culture-27	OTU152	0	0	0	0	0	4	1	8	0	0	0	0
d__Bacteria	k__norank	p__Proteobacteria	c__Betaproteobacteria	o__Burkholderiales	f__Comamonadaceae	g__Comamonas	s__Comamonas_testosteroni_g__Comamonas	OTU762	0	0	0	0	0	0	0	0	0	0	0	0
d__Bacteria	k__norank	p__Firmicutes	c__Clostridia	o__Clostridiales	f__Family_XIII	g__Anaerovorax	s__uncultured_bacterium_g__Anaerovorax	OTU235	1	0	0	3	1	7	6	16	4	12	2	6
d__Bacteria	k__norank	p__Cyanobacteria	c__Cyanobacteria	o__Gastranaerophilales	f__norank_o__Gastranaerophilales	g__norank_o__Gastranaerophilales	s__uncultured_bacterium_g__norank_o__Gastranaerophilales	OTU722	0	0	0	1	0	0	0	4	1	1	0	0
d__Bacteria	k__norank	p__Bacteroidetes	c__Bacteroidia	o__Bacteroidales	f__Bacteroidales_UCG-001	g__norank_f__Bacteroidales_UCG-001	s__uncultured_prokaryote_g__norank_f__Bacteroidales_UCG-001	OTU750	0	0	0	0	0	0	0	0	0	0	0	0
d__Bacteria	k__norank	p__Bacteroidetes	c__Bacteroidia	o__Bacteroidales	f__Rikenellaceae	g__Alistipes	s__uncultured_bacterium_g__Alistipes	OTU226	0	2	5	4	1	1	19	18	3	2	0	5
d__Bacteria	k__norank	p__Firmicutes	c__Clostridia	o__Clostridiales	f__Ruminococcaceae	g__Ruminococcaceae_NK4A214_group	s__gut_metagenome_g__Ruminococcaceae_NK4A214_group	OTU652	11	57	292	116	56	10	61	0	15	1	123	112
d__Bacteria	k__norank	p__Firmicutes	c__Clostridia	o__Clostridiales	f__Ruminococcaceae	g__Ruminococcus_1	s__unclassified_g__Ruminococcus_1	OTU668	3	14	22	27	27	203	221	45	406	0	19	50
d__Bacteria	k__norank	p__Firmicutes	c__Clostridia	o__Clostridiales	f__Lachnospiraceae	g__norank_f__Lachnospiraceae	s__uncultured_bacterium_g__norank_f__Lachnospiraceae	OTU132	0	1	0	5	1	0	1	0	2	20	1	5
d__Bacteria	k__norank	p__Firmicutes	c__Clostridia	o__Clostridiales	f__Ruminococcaceae	g__Anaerotruncus	s__uncultured_bacterium_g__Anaerotruncus	OTU482	0	0	2	0	0	7	11	0	0	2	0	0
d__Bacteria	k__norank	p__Firmicutes	c__Clostridia	o__Clostridiales	f__Christensenellaceae	g__Christensenellaceae_R-7_group	s__uncultured_bacterium_g__Christensenellaceae_R-7_group	OTU328	0	1	10	4	0	6	1	0	1	2	4	4
d__Bacteria	k__norank	p__Firmicutes	c__Clostridia	o__Clostridiales	f__Lachnospiraceae	g__Lachnospiraceae_NK4A136_group	s__unclassified_g__Lachnospiraceae_NK4A136_group	OTU682	0	0	0	0	0	1	2	0	0	0	0	0
d__Bacteria	k__norank	p__Firmicutes	c__Clostridia	o__Clostridiales	f__Lachnospiraceae	g__Lachnospiraceae_NK4A136_group	s__unclassified_g__Lachnospiraceae_NK4A136_group	OTU683	0	0	0	0	2	12	6	12	3	29	0	1
d__Bacteria	k__norank	p__Firmicutes	c__Clostridia	o__Clostridiales	f__unclassified_o__Clostridiales	g__unclassified_o__Clostridiales	s__unclassified_o__Clostridiales	OTU6	1	0	2	2	0	1	0	0	0	0	3	3
d__Bacteria	k__norank	p__Bacteroidetes	c__Bacteroidia	o__Bacteroidales	f__Rikenellaceae	g__Alistipes	s__unclassified_g__Alistipes	OTU216	0	0	3	19	0	1	8	10	3	1	0	3
d__Bacteria	k__norank	p__Firmicutes	c__Clostridia	o__Clostridiales	f__Defluviitaleaceae	g__Defluviitaleaceae_UCG-011	s__unclassified_g__Defluviitaleaceae_UCG-011	OTU610	0	1	0	2	1	2	7	2	0	0	0	2
d__Bacteria	k__norank	p__Firmicutes	c__Bacilli	o__Lactobacillales	f__Lactobacillaceae	g__Lactobacillus	s__uncultured_bacterium_g__Lactobacillus	OTU557	78	153	25	42	182	0	1	0	4	0	2	17
d__Bacteria	k__norank	p__Proteobacteria	c__Gammaproteobacteria	o__Enterobacteriales	f__Enterobacteriaceae	g__Morganella	s__unclassified_g__Morganella	OTU770	0	0	0	0	0	0	1	0	0	0	0	0
d__Bacteria	k__norank	p__Actinobacteria	c__Actinobacteria	o__Coriobacteriales	f__Coriobacteriaceae	g__Enterorhabdus	s__uncultured_bacterium_g__Enterorhabdus	OTU90	4	12	13	10	3	3	4	1	1	0	7	4
d__Bacteria	k__norank	p__Firmicutes	c__Clostridia	o__Clostridiales	f__Lachnospiraceae	g__unclassified_f__Lachnospiraceae	s__unclassified_f__Lachnospiraceae	OTU690	0	2	3	1	0	7	9	6	8	13	0	2
d__Bacteria	k__norank	p__Actinobacteria	c__Actinobacteria	o__Coriobacteriales	f__Coriobacteriaceae	g__Adlercreutzia	s__unclassified_g__Adlercreutzia	OTU326	22	32	278	25	28	35	8	20	4	30	331	42
d__Bacteria	k__norank	p__Firmicutes	c__Clostridia	o__Clostridiales	f__Lachnospiraceae	g__Lachnospiraceae_UCG-001	s__unclassified_g__Lachnospiraceae_UCG-001	OTU77	0	0	0	0	0	0	0	0	0	0	0	0
d__Bacteria	k__norank	p__Actinobacteria	c__Actinobacteria	o__Coriobacteriales	f__Coriobacteriaceae	g__unclassified_f__Coriobacteriaceae	s__unclassified_f__Coriobacteriaceae	OTU508	0	2	2	2	0	1	0	1	0	0	0	2
d__Bacteria	k__norank	p__Firmicutes	c__Clostridia	o__Clostridiales	f__Ruminococcaceae	g__unclassified_f__Ruminococcaceae	s__unclassified_f__Ruminococcaceae	OTU535	3	3	85	50	11	25	32	47	26	23	3	39
d__Bacteria	k__norank	p__Firmicutes	c__Clostridia	o__Clostridiales	f__Lachnospiraceae	g__[Eubacterium]_ruminantium_group	s__uncultured_bacterium_g__[Eubacterium]_ruminantium_group	OTU371	0	0	5	0	0	0	0	0	0	0	0	166
d__Bacteria	k__norank	p__Firmicutes	c__Clostridia	o__Clostridiales	f__Clostridiales_vadinBB60_group	g__norank_f__Clostridiales_vadinBB60_group	s__unclassified_g__norank_f__Clostridiales_vadinBB60_group	OTU113	0	0	0	1	0	2	0	1	0	0	0	0
d__Bacteria	k__norank	p__Firmicutes	c__Clostridia	o__Clostridiales	f__Peptostreptococcaceae	g__unclassified_f__Peptostreptococcaceae	s__unclassified_f__Peptostreptococcaceae	OTU642	0	4	0	4	0	0	0	0	0	1	2	26
d__Bacteria	k__norank	p__Firmicutes	c__Erysipelotrichia	o__Erysipelotrichales	f__Erysipelotrichaceae	g__Faecalitalea	s__[Eubacterium]_dolichum	OTU228	0	0	0	1	0	0	0	18	0	2	1	0
d__Bacteria	k__norank	p__Firmicutes	c__Clostridia	o__Clostridiales	f__Lachnospiraceae	g__Lachnospiraceae_NK4A136_group	s__uncultured_bacterium_g__Lachnospiraceae_NK4A136_group	OTU151	0	0	0	0	0	2	0	0	0	0	0	0
d__Bacteria	k__norank	p__Firmicutes	c__Clostridia	o__Clostridiales	f__Ruminococcaceae	g__unclassified_f__Ruminococcaceae	s__unclassified_f__Ruminococcaceae	OTU622	0	4	33	6	0	9	35	15	44	19	0	11
d__Bacteria	k__norank	p__Proteobacteria	c__Alphaproteobacteria	o__Rhodospirillales	f__Acetobacteraceae	g__Komagataeibacter	s__Komagataeibacter_saccharivorans_g__Komagataeibacter	OTU747	0	0	0	0	0	0	0	0	0	0	0	0
d__Bacteria	k__norank	p__Firmicutes	c__Clostridia	o__Clostridiales	f__Ruminococcaceae	g__Anaerotruncus	s__uncultured_bacterium_g__Anaerotruncus	OTU340	0	0	2	2	0	7	4	5	3	5	1	1
d__Bacteria	k__norank	p__Firmicutes	c__Clostridia	o__Clostridiales	f__Ruminococcaceae	g__unclassified_f__Ruminococcaceae	s__unclassified_f__Ruminococcaceae	OTU583	5	7	4	6	1	16	19	26	71	128	1	12
d__Bacteria	k__norank	p__Proteobacteria	c__Gammaproteobacteria	o__unclassified_c__Gammaproteobacteria	f__unclassified_c__Gammaproteobacteria	g__unclassified_c__Gammaproteobacteria	s__unclassified_c__Gammaproteobacteria	OTU776	0	0	0	0	0	0	0	0	0	0	0	0
d__Bacteria	k__norank	p__Firmicutes	c__Clostridia	o__Clostridiales	f__Ruminococcaceae	g__Anaerotruncus	s__uncultured_bacterium_g__Anaerotruncus	OTU344	0	0	1	0	0	2	7	3	3	0	3	3
d__Bacteria	k__norank	p__Firmicutes	c__unclassified_p__Firmicutes	o__unclassified_p__Firmicutes	f__unclassified_p__Firmicutes	g__unclassified_p__Firmicutes	s__unclassified_p__Firmicutes	OTU438	4	3	7	1	3	1	0	0	1	1	2	0
d__Bacteria	k__norank	p__Firmicutes	c__Clostridia	o__Clostridiales	f__Ruminococcaceae	g__Anaerotruncus	s__uncultured_bacterium_g__Anaerotruncus	OTU579	0	0	8	1	1	13	9	6	7	6	0	0
d__Bacteria	k__norank	p__Firmicutes	c__Clostridia	o__Clostridiales	f__Ruminococcaceae	g__Ruminococcaceae_UCG-014	s__unclassified_g__Ruminococcaceae_UCG-014	OTU457	1	7	77	14	13	0	47	68	5	5	17	135
d__Bacteria	k__norank	p__Firmicutes	c__Clostridia	o__Clostridiales	f__Lachnospiraceae	g__norank_f__Lachnospiraceae	s__unclassified_g__norank_f__Lachnospiraceae	OTU294	0	0	0	0	0	1	0	1	1	3	0	1
d__Bacteria	k__norank	p__Proteobacteria	c__Alphaproteobacteria	o__Caulobacterales	f__Caulobacteraceae	g__Brevundimonas	s__unclassified_g__Brevundimonas	OTU733	0	0	0	0	0	0	0	0	0	0	0	0
d__Bacteria	k__norank	p__Firmicutes	c__Clostridia	o__Clostridiales	f__Lachnospiraceae	g__norank_f__Lachnospiraceae	s__unclassified_g__norank_f__Lachnospiraceae	OTU685	0	0	0	0	0	0	0	0	0	2	0	0
d__Bacteria	k__norank	p__Firmicutes	c__Clostridia	o__Clostridiales	f__Lachnospiraceae	g__norank_f__Lachnospiraceae	s__unclassified_g__norank_f__Lachnospiraceae	OTU686	0	0	0	0	0	2	0	0	3	0	0	0
d__Bacteria	k__norank	p__Firmicutes	c__Clostridia	o__Clostridiales	f__Ruminococcaceae	g__unclassified_f__Ruminococcaceae	s__unclassified_f__Ruminococcaceae	OTU57	0	0	1	1	0	0	0	2	0	0	0	0
d__Bacteria	k__norank	p__Proteobacteria	c__Alphaproteobacteria	o__Rhodospirillales	f__Rhodospirillaceae	g__norank_f__Rhodospirillaceae	s__gut_metagenome_g__norank_f__Rhodospirillaceae	OTU706	0	1	0	0	0	1	0	0	0	2	0	0
d__Bacteria	k__norank	p__Firmicutes	c__Clostridia	o__Clostridiales	f__Ruminococcaceae	g__Ruminococcaceae_UCG-005	s__uncultured_Clostridiales_bacterium_g__Ruminococcaceae_UCG-005	OTU625	0	0	0	4	1	1	2	0	4	0	0	0
d__Bacteria	k__norank	p__Firmicutes	c__Clostridia	o__Clostridiales	f__Lachnospiraceae	g__norank_f__Lachnospiraceae	s__unclassified_g__norank_f__Lachnospiraceae	OTU592	0	0	0	0	0	0	8	1	1	9	0	0
d__Bacteria	k__norank	p__Proteobacteria	c__Deltaproteobacteria	o__Desulfovibrionales	f__Desulfovibrionaceae	g__Desulfovibrio	s__unclassified_g__Desulfovibrio	OTU441	0	0	0	0	0	1	1	0	1	1	0	0
d__Bacteria	k__norank	p__Bacteroidetes	c__Bacteroidia	o__Bacteroidales	f__Bacteroidales_S24-7_group	g__norank_f__Bacteroidales_S24-7_group	s__uncultured_bacterium_g__norank_f__Bacteroidales_S24-7_group	OTU175	2	5	39	8	3	68	97	105	41	18	9	25
d__Bacteria	k__norank	p__Bacteroidetes	c__Bacteroidia	o__Bacteroidales	f__Bacteroidales_S24-7_group	g__norank_f__Bacteroidales_S24-7_group	s__uncultured_bacterium_g__norank_f__Bacteroidales_S24-7_group	OTU98	0	8	20	108	1	9	27	13	132	4	0	20
d__Bacteria	k__norank	p__Firmicutes	c__Clostridia	o__Clostridiales	f__Family_XIII	g__[Eubacterium]_brachy_group	s__uncultured_bacterium_g__[Eubacterium]_brachy_group	OTU501	1	0	11	1	2	1	0	2	2	5	7	3
d__Bacteria	k__norank	p__Firmicutes	c__Erysipelotrichia	o__Erysipelotrichales	f__Erysipelotrichaceae	g__Allobaculum	s__unclassified_g__Allobaculum	OTU419	248	1167	0	17	285	0	0	207	0	168	0	456
d__Bacteria	k__norank	p__Firmicutes	c__Clostridia	o__Clostridiales	f__Lachnospiraceae	g__norank_f__Lachnospiraceae	s__uncultured_bacterium_g__norank_f__Lachnospiraceae	OTU529	0	0	0	0	0	2	0	1	1	0	0	0
d__Bacteria	k__norank	p__Bacteroidetes	c__Bacteroidia	o__Bacteroidales	f__Bacteroidales_S24-7_group	g__norank_f__Bacteroidales_S24-7_group	s__uncultured_bacterium_g__norank_f__Bacteroidales_S24-7_group	OTU91	7	64	37	150	58	1021	487	657	294	47	23	228
d__Bacteria	k__norank	p__Firmicutes	c__Clostridia	o__Clostridiales	f__Ruminococcaceae	g__unclassified_f__Ruminococcaceae	s__unclassified_f__Ruminococcaceae	OTU744	0	5	0	0	0	0	0	0	0	0	0	0
d__Bacteria	k__norank	p__Firmicutes	c__Clostridia	o__Clostridiales	f__Lachnospiraceae	g__Eisenbergiella	s__uncultured_bacterium_g__Eisenbergiella	OTU581	0	0	0	0	0	3	3	3	4	1	0	3
d__Bacteria	k__norank	p__Firmicutes	c__Clostridia	o__Clostridiales	f__Lachnospiraceae	g__norank_f__Lachnospiraceae	s__Lachnospiraceae_bacterium_A2	OTU669	0	0	0	0	0	2	0	0	1	0	0	0
d__Bacteria	k__norank	p__Firmicutes	c__Clostridia	o__Clostridiales	f__Ruminococcaceae	g__Ruminococcaceae_UCG-013	s__uncultured_bacterium_g__Ruminococcaceae_UCG-013	OTU39	0	1	2	0	0	0	0	0	0	0	0	0
d__Bacteria	k__norank	p__Firmicutes	c__Clostridia	o__Clostridiales	f__Ruminococcaceae	g__Ruminococcaceae_UCG-010	s__unclassified_g__Ruminococcaceae_UCG-010	OTU75	0	0	0	2	2	3	3	0	1	4	0	3
d__Bacteria	k__norank	p__Firmicutes	c__Clostridia	o__Clostridiales	f__Lachnospiraceae	g__Roseburia	s__uncultured_bacterium_g__Roseburia	OTU209	0	0	0	0	0	3	0	1	0	0	0	0
d__Bacteria	k__norank	p__Firmicutes	c__Clostridia	o__Clostridiales	f__Lachnospiraceae	g__unclassified_f__Lachnospiraceae	s__unclassified_f__Lachnospiraceae	OTU674	0	0	0	0	0	0	0	0	0	0	0	0
d__Bacteria	k__norank	p__Firmicutes	c__Clostridia	o__Clostridiales	f__Lachnospiraceae	g__Lachnoclostridium	s__uncultured_bacterium_g__Lachnoclostridium	OTU671	1	1	27	2	6	39	42	44	48	159	1	2
d__Bacteria	k__norank	p__Firmicutes	c__Clostridia	o__Clostridiales	f__Lachnospiraceae	g__unclassified_f__Lachnospiraceae	s__unclassified_f__Lachnospiraceae	OTU609	0	0	0	0	0	6	2	5	11	6	0	0
d__Bacteria	k__norank	p__Firmicutes	c__Clostridia	o__Clostridiales	f__Lachnospiraceae	g__norank_f__Lachnospiraceae	s__uncultured_bacterium_g__norank_f__Lachnospiraceae	OTU119	0	1	0	0	0	1	0	3	1	0	0	1
d__Bacteria	k__norank	p__Proteobacteria	c__Epsilonproteobacteria	o__Campylobacterales	f__Campylobacteraceae	g__Campylobacter	s__Campylobacter_upsaliensis	OTU117	0	0	1	3	0	1	0	11	0	0	1	0
d__Bacteria	k__norank	p__Firmicutes	c__Clostridia	o__Clostridiales	f__Lachnospiraceae	g__unclassified_f__Lachnospiraceae	s__unclassified_f__Lachnospiraceae	OTU215	0	0	2	0	0	0	0	3	0	0	0	0
d__Bacteria	k__norank	p__Firmicutes	c__Clostridia	o__Clostridiales	f__Lachnospiraceae	g__unclassified_f__Lachnospiraceae	s__unclassified_f__Lachnospiraceae	OTU352	0	0	0	1	0	0	5	0	0	2	0	2
d__Bacteria	k__norank	p__Firmicutes	c__Clostridia	o__Clostridiales	f__Clostridiales_vadinBB60_group	g__norank_f__Clostridiales_vadinBB60_group	s__unclassified_g__norank_f__Clostridiales_vadinBB60_group	OTU341	0	1	0	1	0	1	0	0	2	0	1	0
d__Bacteria	k__norank	p__Firmicutes	c__Clostridia	o__Clostridiales	f__Lachnospiraceae	g__unclassified_f__Lachnospiraceae	s__unclassified_f__Lachnospiraceae	OTU219	0	0	0	0	1	0	5	4	27	1	0	0
d__Bacteria	k__norank	p__Firmicutes	c__Clostridia	o__Clostridiales	f__Lachnospiraceae	g__unclassified_f__Lachnospiraceae	s__unclassified_f__Lachnospiraceae	OTU606	0	0	3	1	0	3	9	5	11	0	0	4
d__Bacteria	k__norank	p__Firmicutes	c__Clostridia	o__Clostridiales	f__Lachnospiraceae	g__unclassified_f__Lachnospiraceae	s__unclassified_f__Lachnospiraceae	OTU454	0	0	122	50	0	3	437	411	679	245	16	0
d__Bacteria	k__norank	p__Firmicutes	c__Clostridia	o__Clostridiales	f__Lachnospiraceae	g__Blautia	s__Blautia_coccoides_g__Blautia	OTU197	0	0	0	1	0	12	3	10	3	1	0	1
d__Bacteria	k__norank	p__Bacteroidetes	c__Bacteroidia	o__Bacteroidales	f__Porphyromonadaceae	g__Parabacteroides	s__unclassified_g__Parabacteroides	OTU196	0	37	17	12	0	9	20	42	6	22	0	5
d__Bacteria	k__norank	p__Proteobacteria	c__Gammaproteobacteria	o__Enterobacteriales	f__Enterobacteriaceae	g__Proteus	s__unclassified_g__Proteus	OTU767	0	0	1	0	0	0	0	0	0	0	0	0
d__Bacteria	k__norank	p__Firmicutes	c__Clostridia	o__Clostridiales	f__Clostridiales_vadinBB60_group	g__norank_f__Clostridiales_vadinBB60_group	s__unclassified_g__norank_f__Clostridiales_vadinBB60_group	OTU337	0	0	0	0	1	0	0	3	0	1	7	0
d__Bacteria	k__norank	p__Firmicutes	c__Clostridia	o__Clostridiales	f__Ruminococcaceae	g__Ruminiclostridium	s__unclassified_g__Ruminiclostridium	OTU765	0	0	0	0	0	0	0	0	0	0	0	0
d__Bacteria	k__norank	p__Bacteroidetes	c__Bacteroidia	o__Bacteroidales	f__Bacteroidales_S24-7_group	g__norank_f__Bacteroidales_S24-7_group	s__uncultured_bacterium_g__norank_f__Bacteroidales_S24-7_group	OTU343	1	0	0	0	0	0	2	3	43	0	0	0
d__Bacteria	k__norank	p__Proteobacteria	c__Deltaproteobacteria	o__Desulfovibrionales	f__Desulfovibrionaceae	g__Bilophila	s__uncultured_bacterium_g__Bilophila	OTU273	0	0	0	0	0	2	5	12	2	5	2	3
d__Bacteria	k__norank	p__Firmicutes	c__Bacilli	o__Lactobacillales	f__Carnobacteriaceae	g__Granulicatella	s__uncultured_organism_g__Granulicatella	OTU756	0	0	0	0	0	0	0	0	0	0	0	0
d__Bacteria	k__norank	p__Firmicutes	c__Clostridia	o__Clostridiales	f__Ruminococcaceae	g__Anaerotruncus	s__unclassified_g__Anaerotruncus	OTU588	1	10	25	1	4	62	47	75	34	48	1	25
d__Bacteria	k__norank	p__Firmicutes	c__Clostridia	o__Clostridiales	f__Lachnospiraceae	g__unclassified_f__Lachnospiraceae	s__unclassified_f__Lachnospiraceae	OTU568	0	0	2	0	0	11	4	0	1	2	0	3
d__Bacteria	k__norank	p__Firmicutes	c__Erysipelotrichia	o__Erysipelotrichales	f__Erysipelotrichaceae	g__unclassified_f__Erysipelotrichaceae	s__unclassified_f__Erysipelotrichaceae	OTU471	0	0	0	2	0	0	0	0	0	2	0	0
d__Bacteria	k__norank	p__Firmicutes	c__Clostridia	o__Clostridiales	f__Lachnospiraceae	g__Tyzzerella	s__uncultured_bacterium_g__Tyzzerella	OTU619	0	0	21	1	1	52	79	62	26	14	2	11
d__Bacteria	k__norank	p__Cyanobacteria	c__Cyanobacteria	o__Gastranaerophilales	f__norank_o__Gastranaerophilales	g__norank_o__Gastranaerophilales	s__unclassified_g__norank_o__Gastranaerophilales	OTU339	0	0	0	2	0	0	0	2	0	0	1	0
d__Bacteria	k__norank	p__Actinobacteria	c__Actinobacteria	o__Coriobacteriales	f__Coriobacteriaceae	g__unclassified_f__Coriobacteriaceae	s__unclassified_f__Coriobacteriaceae	OTU40	3	12	1	14	5	0	0	4	1	1	0	2
d__Bacteria	k__norank	p__Proteobacteria	c__Gammaproteobacteria	o__Pseudomonadales	f__Pseudomonadaceae	g__Pseudomonas	s__unclassified_g__Pseudomonas	OTU761	0	0	0	0	0	0	0	0	1	0	0	0
d__Bacteria	k__norank	p__Firmicutes	c__Bacilli	o__Lactobacillales	f__Lactobacillaceae	g__Lactobacillus	s__unclassified_g__Lactobacillus	OTU367	21	15	20	8	15	0	3	0	1	4	15	36
d__Bacteria	k__norank	p__Firmicutes	c__Clostridia	o__Clostridiales	f__Ruminococcaceae	g__norank_f__Ruminococcaceae	s__unclassified_g__norank_f__Ruminococcaceae	OTU653	0	0	5	4	0	0	0	3	4	0	0	2
d__Bacteria	k__norank	p__Firmicutes	c__Clostridia	o__Clostridiales	f__Ruminococcaceae	g__Ruminococcaceae_UCG-010	s__uncultured_bacterium_g__Ruminococcaceae_UCG-010	OTU181	0	0	0	0	1	8	10	0	3	1	0	2
d__Bacteria	k__norank	p__Proteobacteria	c__Alphaproteobacteria	o__Rhizobiales	f__Rhizobiaceae	g__Rhizobium	s__Rhizobium_pusense	OTU755	1	0	0	0	0	0	0	0	0	0	0	0
d__Bacteria	k__norank	p__Bacteroidetes	c__Bacteroidia	o__Bacteroidales	f__Bacteroidales_S24-7_group	g__norank_f__Bacteroidales_S24-7_group	s__unclassified_g__norank_f__Bacteroidales_S24-7_group	OTU164	0	0	0	0	0	21	6	2	6	0	0	3
d__Bacteria	k__norank	p__Firmicutes	c__Clostridia	o__Clostridiales	f__Family_XIII	g__Family_XIII_AD3011_group	s__uncultured_bacterium_g__Family_XIII_AD3011_group	OTU369	0	0	0	0	0	1	2	0	1	0	0	1
d__Bacteria	k__norank	p__Firmicutes	c__Clostridia	o__Clostridiales	f__Ruminococcaceae	g__norank_f__Ruminococcaceae	s__unclassified_g__norank_f__Ruminococcaceae	OTU22	2	4	3	2	2	1	0	7	10	77	1	6
d__Bacteria	k__norank	p__Actinobacteria	c__Actinobacteria	o__Coriobacteriales	f__Coriobacteriaceae	g__Enterorhabdus	s__uncultured_bacterium_g__Enterorhabdus	OTU560	2	24	13	6	5	0	9	2	8	0	6	12
d__Bacteria	k__norank	p__Bacteroidetes	c__Bacteroidia	o__Bacteroidales	f__Bacteroidales_S24-7_group	g__norank_f__Bacteroidales_S24-7_group	s__unclassified_g__norank_f__Bacteroidales_S24-7_group	OTU763	0	0	0	0	0	0	0	0	0	0	0	0
d__Bacteria	k__norank	p__Firmicutes	c__Clostridia	o__Clostridiales	f__Ruminococcaceae	g__Anaerotruncus	s__unclassified_g__Anaerotruncus	OTU510	0	0	0	0	0	2	0	0	0	0	0	1
d__Bacteria	k__norank	p__Firmicutes	c__Clostridia	o__Clostridiales	f__Ruminococcaceae	g__norank_f__Ruminococcaceae	s__unclassified_g__norank_f__Ruminococcaceae	OTU26	0	1	3	2	0	13	22	19	8	24	0	4
d__Bacteria	k__norank	p__Firmicutes	c__Clostridia	o__Clostridiales	f__Clostridiaceae_1	g__Clostridium_sensu_stricto_1	s__uncultured_bacterium_g__Clostridium_sensu_stricto_1	OTU10	55	2	9	20	21	4	2	19	5	2	18	27
d__Bacteria	k__norank	p__Firmicutes	c__Clostridia	o__Clostridiales	f__Lachnospiraceae	g__unclassified_f__Lachnospiraceae	s__unclassified_f__Lachnospiraceae	OTU483	0	0	0	0	0	5	1	1	5	9	0	1
d__Bacteria	k__norank	p__Bacteroidetes	c__Bacteroidia	o__Bacteroidales	f__Rikenellaceae	g__Alistipes	s__uncultured_bacterium_g__Alistipes	OTU351	2	8	3	0	0	1	13	5	0	0	1	4
d__Bacteria	k__norank	p__Firmicutes	c__Clostridia	o__Clostridiales	f__Ruminococcaceae	g__Anaerotruncus	s__unclassified_g__Anaerotruncus	OTU160	0	0	0	0	0	1	1	1	0	0	0	0
d__Bacteria	k__norank	p__Firmicutes	c__Clostridia	o__Clostridiales	f__Lachnospiraceae	g__norank_f__Lachnospiraceae	s__uncultured_bacterium_g__norank_f__Lachnospiraceae	OTU306	0	0	3	0	0	5	4	5	4	32	0	1
d__Bacteria	k__norank	p__Firmicutes	c__Clostridia	o__Clostridiales	f__Lachnospiraceae	g__[Acetivibrio]_ethanolgignens_group	s__unclassified_g__[Acetivibrio]_ethanolgignens_group	OTU484	0	0	0	0	1	16	46	19	5	11	1	2
d__Bacteria	k__norank	p__Cyanobacteria	c__Cyanobacteria	o__Gastranaerophilales	f__norank_o__Gastranaerophilales	g__norank_o__Gastranaerophilales	s__unclassified_g__norank_o__Gastranaerophilales	OTU434	0	0	1	2	0	0	2	0	0	0	0	0
d__Bacteria	k__norank	p__Firmicutes	c__Clostridia	o__Clostridiales	f__Ruminococcaceae	g__Ruminococcaceae_UCG-010	s__uncultured_bacterium_g__Ruminococcaceae_UCG-010	OTU575	2	1	12	4	1	5	14	6	2	4	3	10
d__Bacteria	k__norank	p__Proteobacteria	c__Deltaproteobacteria	o__Desulfovibrionales	f__Desulfovibrionaceae	g__Desulfovibrio	s__uncultured_bacterium_g__Desulfovibrio	OTU517	1	1	1	8	1	233	27	65	18	15	3	4
d__Bacteria	k__norank	p__Firmicutes	c__Clostridia	o__Clostridiales	f__Ruminococcaceae	g__norank_f__Ruminococcaceae	s__unclassified_g__norank_f__Ruminococcaceae	OTU184	0	0	0	0	0	3	2	2	0	0	0	0
d__Bacteria	k__norank	p__Bacteroidetes	c__Bacteroidia	o__Bacteroidales	f__Porphyromonadaceae	g__Parabacteroides	s__Parabacteroides_merdae	OTU329	0	2	11	2	0	5	1	5	2	0	2	0
d__Bacteria	k__norank	p__Proteobacteria	c__Betaproteobacteria	o__Burkholderiales	f__Alcaligenaceae	g__Sutterella	s__unclassified_g__Sutterella	OTU664	0	5	0	0	0	5	1	3	5	0	0	0
d__Bacteria	k__norank	p__Firmicutes	c__Clostridia	o__Clostridiales	f__Lachnospiraceae	g__Blautia	s__uncultured_bacterium_g__Blautia	OTU667	0	23	1	0	0	1	0	2	4	0	0	1
d__Bacteria	k__norank	p__Actinobacteria	c__Actinobacteria	o__Coriobacteriales	f__Coriobacteriaceae	g__Gordonibacter	s__unclassified_g__Gordonibacter	OTU534	4	28	7	27	6	1	2	5	1	6	5	6
d__Bacteria	k__norank	p__Firmicutes	c__Clostridia	o__Clostridiales	f__Lachnospiraceae	g__Lachnospiraceae_NK4A136_group	s__unclassified_g__Lachnospiraceae_NK4A136_group	OTU576	0	10	6	1	0	1	22	17	7	22	0	1
d__Bacteria	k__norank	p__Firmicutes	c__Clostridia	o__Clostridiales	f__Ruminococcaceae	g__unclassified_f__Ruminococcaceae	s__unclassified_f__Ruminococcaceae	OTU555	0	4	15	26	1	34	28	71	24	13	2	22
d__Bacteria	k__norank	p__Firmicutes	c__Clostridia	o__Clostridiales	f__Lachnospiraceae	g__unclassified_f__Lachnospiraceae	s__unclassified_f__Lachnospiraceae	OTU147	0	0	0	0	0	34	0	0	0	0	0	0
d__Bacteria	k__norank	p__Firmicutes	c__Clostridia	o__Clostridiales	f__Ruminococcaceae	g__Ruminococcus_2	s__uncultured_bacterium_g__Ruminococcus_2	OTU660	23	66	8	89	197	439	803	87	974	40	230	8
d__Bacteria	k__norank	p__Actinobacteria	c__Actinobacteria	o__Coriobacteriales	f__Coriobacteriaceae	g__Enterorhabdus	s__Asaccharobacter_sp._WCA-131-CoC-2	OTU561	0	0	9	1	1	0	0	0	0	0	3	1
d__Bacteria	k__norank	p__Bacteroidetes	c__Bacteroidia	o__Bacteroidales	f__Rikenellaceae	g__vadinBC27_wastewater-sludge_group	s__uncultured_prokaryote_g__vadinBC27_wastewater-sludge_group	OTU759	0	0	0	0	0	0	0	0	0	0	0	0
d__Bacteria	k__norank	p__Firmicutes	c__Clostridia	o__Clostridiales	f__Ruminococcaceae	g__Hydrogenoanaerobacterium	s__unclassified_g__Hydrogenoanaerobacterium	OTU450	0	0	0	0	0	0	0	0	0	0	0	0
d__Bacteria	k__norank	p__Bacteroidetes	c__Bacteroidia	o__Bacteroidales	f__Bacteroidaceae	g__Bacteroides	s__Bacteroides_acidifaciens	OTU382	0	7	22	8	3	6	26	41	4	10	1	10
d__Bacteria	k__norank	p__Firmicutes	c__Clostridia	o__Clostridiales	f__Ruminococcaceae	g__[Eubacterium]_coprostanoligenes_group	s__unclassified_g__[Eubacterium]_coprostanoligenes_group	OTU277	0	1	9	1	2	0	3	2	1	10	4	0
d__Bacteria	k__norank	p__Firmicutes	c__Clostridia	o__Clostridiales	f__Ruminococcaceae	g__Ruminococcaceae_UCG-005	s__unclassified_g__Ruminococcaceae_UCG-005	OTU102	0	0	0	1	1	0	0	0	0	0	0	0
d__Bacteria	k__norank	p__Firmicutes	c__Bacilli	o__Lactobacillales	f__Lactobacillaceae	g__Lactobacillus	s__Lactobacillus_johnsonii	OTU125	1282	4815	749	1072	1988	27	207	23	76	286	245	4111
d__Bacteria	k__norank	p__Firmicutes	c__Clostridia	o__Clostridiales	f__Ruminococcaceae	g__Ruminiclostridium_5	s__uncultured_bacterium_g__Ruminiclostridium_5	OTU437	0	1	34	8	1	3	10	5	1	32	6	5
d__Bacteria	k__norank	p__Firmicutes	c__Clostridia	o__Clostridiales	f__Ruminococcaceae	g__Ruminococcaceae_UCG-005	s__uncultured_rumen_bacterium_g__Ruminococcaceae_UCG-005	OTU24	0	11	0	0	0	0	0	0	0	0	0	0
d__Bacteria	k__norank	p__Firmicutes	c__Clostridia	o__Clostridiales	f__Ruminococcaceae	g__unclassified_f__Ruminococcaceae	s__unclassified_f__Ruminococcaceae	OTU692	0	0	0	0	0	4	0	0	2	0	1	0
d__Bacteria	k__norank	p__Firmicutes	c__Clostridia	o__Clostridiales	f__Christensenellaceae	g__Christensenellaceae_R-7_group	s__uncultured_Bacillales_bacterium_g__Christensenellaceae_R-7_group	OTU195	1	2	3	0	1	5	2	2	2	1	1	2
d__Bacteria	k__norank	p__Bacteroidetes	c__Bacteroidia	o__Bacteroidales	f__Porphyromonadaceae	g__Odoribacter	s__uncultured_bacterium_g__Odoribacter	OTU532	1	1	0	11	0	6	14	19	1	4	13	6
d__Bacteria	k__norank	p__Tenericutes	c__Mollicutes	o__Mollicutes_RF9	f__norank_o__Mollicutes_RF9	g__norank_o__Mollicutes_RF9	s__uncultured_Erysipelotrichaceae_bacterium_g__norank_o__Mollicutes_RF9	OTU496	10	13	23	61	19	4	14	0	9	6	0	6
d__Bacteria	k__norank	p__Firmicutes	c__Clostridia	o__Clostridiales	f__Ruminococcaceae	g__Ruminococcaceae_UCG-014	s__unclassified_g__Ruminococcaceae_UCG-014	OTU493	2	9	0	0	0	0	0	2	10	0	37	0
d__Bacteria	k__norank	p__Firmicutes	c__Clostridia	o__Clostridiales	f__Ruminococcaceae	g__Oscillibacter	s__uncultured_bacterium_g__Oscillibacter	OTU591	0	0	3	0	0	4	2	9	8	9	0	3
d__Bacteria	k__norank	p__Firmicutes	c__Erysipelotrichia	o__Erysipelotrichales	f__Erysipelotrichaceae	g__Turicibacter	s__Turicibacter_sp._LA61	OTU335	46	1	16	12	56	0	0	2	2	0	8	1
d__Bacteria	k__norank	p__Firmicutes	c__Clostridia	o__Clostridiales	f__Ruminococcaceae	g__Ruminococcaceae_UCG-014	s__unclassified_g__Ruminococcaceae_UCG-014	OTU499	0	0	0	0	0	0	0	0	0	0	0	0
d__Bacteria	k__norank	p__Firmicutes	c__Clostridia	o__Clostridiales	f__Lachnospiraceae	g__norank_f__Lachnospiraceae	s__unclassified_g__norank_f__Lachnospiraceae	OTU565	0	0	0	0	0	0	0	2	0	0	0	0
d__Bacteria	k__norank	p__Firmicutes	c__Clostridia	o__Clostridiales	f__Clostridiaceae_1	g__Clostridium_sensu_stricto_1	s__uncultured_bacterium_g__Clostridium_sensu_stricto_1	OTU370	6678	39	1208	2021	2317	451	398	1514	225	626	1460	2695
d__Bacteria	k__norank	p__Firmicutes	c__Clostridia	o__Clostridiales	f__Lachnospiraceae	g__Lachnospiraceae_NK4A136_group	s__unclassified_g__Lachnospiraceae_NK4A136_group	OTU715	0	0	0	0	0	6	16	0	0	0	0	1
d__Bacteria	k__norank	p__Firmicutes	c__Clostridia	o__Clostridiales	f__Lachnospiraceae	g__Blautia	s__unclassified_g__Blautia	OTU595	0	0	0	0	1	5	12	1	1	1	0	14
d__Bacteria	k__norank	p__Bacteroidetes	c__Bacteroidia	o__Bacteroidales	f__Prevotellaceae	g__Prevotella_9	s__uncultured_bacterium_g__Prevotella_9	OTU106	1	37	9	60	0	15	339	0	645	2	0	6
d__Bacteria	k__norank	p__Firmicutes	c__Clostridia	o__Clostridiales	f__Ruminococcaceae	g__Ruminococcaceae_UCG-014	s__unclassified_g__Ruminococcaceae_UCG-014	OTU707	0	8	0	1	0	0	0	0	5	0	0	0
d__Bacteria	k__norank	p__Actinobacteria	c__Actinobacteria	o__Corynebacteriales	f__Corynebacteriaceae	g__Corynebacterium	s__Corynebacterium_mastitidis	OTU734	0	4	1	2	0	0	0	0	0	1	0	1
d__Bacteria	k__norank	p__Firmicutes	c__Clostridia	o__Clostridiales	f__Family_XIII	g__[Eubacterium]_nodatum_group	s__unclassified_g__[Eubacterium]_nodatum_group	OTU139	0	0	3	5	1	1	2	2	2	3	3	4
d__Bacteria	k__norank	p__Firmicutes	c__Clostridia	o__Clostridiales	f__Ruminococcaceae	g__Ruminococcaceae_UCG-005	s__uncultured_Clostridiales_bacterium_g__Ruminococcaceae_UCG-005	OTU276	0	0	30	0	3	2	19	3	5	51	0	1
d__Bacteria	k__norank	p__Firmicutes	c__Clostridia	o__Clostridiales	f__Lachnospiraceae	g__Blautia	s__unclassified_g__Blautia	OTU613	0	0	2	0	0	18	7	5	6	11	0	3
d__Bacteria	k__norank	p__Tenericutes	c__Mollicutes	o__Mollicutes_RF9	f__norank_o__Mollicutes_RF9	g__norank_o__Mollicutes_RF9	s__unclassified_g__norank_o__Mollicutes_RF9	OTU19	0	0	0	2	0	0	5	0	2	0	3	1
d__Bacteria	k__norank	p__Bacteroidetes	c__Flavobacteriia	o__Flavobacteriales	f__Flavobacteriaceae	g__norank_f__Flavobacteriaceae	s__gut_metagenome_g__norank_f__Flavobacteriaceae	OTU177	0	2	8	0	0	1	8	9	13	5	5	0
d__Bacteria	k__norank	p__Bacteroidetes	c__Bacteroidia	o__Bacteroidales	f__Bacteroidales_S24-7_group	g__norank_f__Bacteroidales_S24-7_group	s__uncultured_bacterium_g__norank_f__Bacteroidales_S24-7_group	OTU130	5	17	13	14	23	297	139	82	84	55	28	80
d__Bacteria	k__norank	p__Bacteroidetes	c__Bacteroidia	o__Bacteroidales	f__Prevotellaceae	g__Prevotellaceae_Ga6A1_group	s__unclassified_g__Prevotellaceae_Ga6A1_group	OTU412	0	0	0	0	2	0	0	0	0	0	0	0
d__Bacteria	k__norank	p__Actinobacteria	c__Actinobacteria	o__Coriobacteriales	f__Coriobacteriaceae	g__unclassified_f__Coriobacteriaceae	s__unclassified_f__Coriobacteriaceae	OTU558	11	44	15	56	17	3	1	10	2	16	36	4
d__Bacteria	k__norank	p__Firmicutes	c__Erysipelotrichia	o__Erysipelotrichales	f__Erysipelotrichaceae	g__Allobaculum	s__uncultured_bacterium_g__Allobaculum	OTU751	0	0	0	0	0	0	0	0	0	0	0	0
d__Bacteria	k__norank	p__Firmicutes	c__unclassified_p__Firmicutes	o__unclassified_p__Firmicutes	f__unclassified_p__Firmicutes	g__unclassified_p__Firmicutes	s__unclassified_p__Firmicutes	OTU544	67	20	46	26	53	1	5	0	1	12	45	74
d__Bacteria	k__norank	p__Proteobacteria	c__Deltaproteobacteria	o__Desulfovibrionales	f__Desulfovibrionaceae	g__Desulfovibrio	s__unclassified_g__Desulfovibrio	OTU586	0	0	0	0	0	0	1	0	0	0	0	0
d__Bacteria	k__norank	p__Firmicutes	c__Clostridia	o__Clostridiales	f__Ruminococcaceae	g__Ruminiclostridium_1	s__uncultured_bacterium_g__Ruminiclostridium_1	OTU234	0	0	1	0	1	2	3	2	0	1	0	0
d__Bacteria	k__norank	p__Firmicutes	c__unclassified_p__Firmicutes	o__unclassified_p__Firmicutes	f__unclassified_p__Firmicutes	g__unclassified_p__Firmicutes	s__unclassified_p__Firmicutes	OTU266	0	0	0	0	0	0	0	0	0	2	0	0
d__Bacteria	k__norank	p__Firmicutes	c__Clostridia	o__Clostridiales	f__Defluviitaleaceae	g__Defluviitaleaceae_UCG-011	s__uncultured_organism_g__Defluviitaleaceae_UCG-011	OTU74	0	0	1	0	0	2	1	0	3	2	0	0
d__Bacteria	k__norank	p__Firmicutes	c__Clostridia	o__Clostridiales	f__Ruminococcaceae	g__norank_f__Ruminococcaceae	s__unclassified_g__norank_f__Ruminococcaceae	OTU476	0	3	43	4	1	4	11	7	9	1	1	0
d__Bacteria	k__norank	p__Firmicutes	c__Clostridia	o__Clostridiales	f__Ruminococcaceae	g__Anaerotruncus	s__unclassified_g__Anaerotruncus	OTU237	0	0	0	0	0	2	5	0	3	6	0	0
d__Bacteria	k__norank	p__Firmicutes	c__Clostridia	o__Clostridiales	f__Lachnospiraceae	g__Lachnospiraceae_NK4A136_group	s__unclassified_g__Lachnospiraceae_NK4A136_group	OTU259	0	0	2	0	0	0	64	0	45	0	0	10
d__Bacteria	k__norank	p__Firmicutes	c__Clostridia	o__Clostridiales	f__Lachnospiraceae	g__Lachnospiraceae_NK4A136_group	s__unclassified_g__Lachnospiraceae_NK4A136_group	OTU255	0	5	269	13	6	84	445	187	487	2506	9	378
d__Bacteria	k__norank	p__Firmicutes	c__Clostridia	o__Clostridiales	f__Ruminococcaceae	g__unclassified_f__Ruminococcaceae	s__unclassified_f__Ruminococcaceae	OTU648	0	1	1	6	1	4	13	7	4	1	1	5
d__Bacteria	k__norank	p__Bacteroidetes	c__Flavobacteriia	o__Flavobacteriales	f__Flavobacteriaceae	g__Cloacibacterium	s__uncultured_bacterium_g__Cloacibacterium	OTU736	0	0	0	0	0	0	0	0	0	0	0	0
d__Bacteria	k__norank	p__Firmicutes	c__Clostridia	o__Clostridiales	f__Ruminococcaceae	g__Ruminococcaceae_UCG-010	s__unclassified_g__Ruminococcaceae_UCG-010	OTU35	0	1	0	2	2	0	8	0	1	0	0	0
d__Bacteria	k__norank	p__Firmicutes	c__Clostridia	o__Clostridiales	f__Ruminococcaceae	g__unclassified_f__Ruminococcaceae	s__unclassified_f__Ruminococcaceae	OTU616	0	1	2	0	1	4	2	1	2	0	0	2
d__Bacteria	k__norank	p__Firmicutes	c__Clostridia	o__Clostridiales	f__Ruminococcaceae	g__unclassified_f__Ruminococcaceae	s__unclassified_f__Ruminococcaceae	OTU1	1	2	1	1	0	6	4	5	0	0	0	3
d__Bacteria	k__norank	p__Bacteroidetes	c__Bacteroidia	o__Bacteroidales	f__Bacteroidales_S24-7_group	g__norank_f__Bacteroidales_S24-7_group	s__unclassified_g__norank_f__Bacteroidales_S24-7_group	OTU85	0	0	1	2	0	20	11	25	0	0	3	0
d__Bacteria	k__norank	p__Firmicutes	c__Clostridia	o__Clostridiales	f__Lachnospiraceae	g__Lachnospiraceae_NK4A136_group	s__unclassified_g__Lachnospiraceae_NK4A136_group	OTU218	0	0	0	0	0	0	0	2	0	0	0	0
d__Bacteria	k__norank	p__Firmicutes	c__Clostridia	o__Clostridiales	f__Ruminococcaceae	g__Ruminiclostridium_1	s__uncultured_organism_g__Ruminiclostridium_1	OTU23	0	1	4	0	4	12	8	1	7	0	1	0
d__Bacteria	k__norank	p__Firmicutes	c__Clostridia	o__Clostridiales	f__Lachnospiraceae	g__Lachnospiraceae_UCG-001	s__unclassified_g__Lachnospiraceae_UCG-001	OTU577	0	8	25	0	2	43	78	0	2	55	0	0
d__Bacteria	k__norank	p__Firmicutes	c__Clostridia	o__Clostridiales	f__Christensenellaceae	g__Christensenellaceae_R-7_group	s__uncultured_prokaryote_g__Christensenellaceae_R-7_group	OTU304	0	2	11	0	1	1	11	1	3	2	3	4
d__Bacteria	k__norank	p__Firmicutes	c__Clostridia	o__Clostridiales	f__Ruminococcaceae	g__Ruminococcaceae_UCG-014	s__unclassified_g__Ruminococcaceae_UCG-014	OTU368	0	0	0	0	0	0	34	1	4	0	51	126
d__Bacteria	k__norank	p__Firmicutes	c__Clostridia	o__Clostridiales	f__Ruminococcaceae	g__Ruminococcaceae_UCG-014	s__unclassified_g__Ruminococcaceae_UCG-014	OTU364	0	0	0	0	2	0	0	0	0	0	0	9
d__Bacteria	k__norank	p__Firmicutes	c__Clostridia	o__Clostridiales	f__Lachnospiraceae	g__Roseburia	s__uncultured_bacterium_g__Roseburia	OTU659	0	1	10	1	2	59	11	4	4	7	2	0
d__Bacteria	k__norank	p__Firmicutes	c__Clostridia	o__Clostridiales	f__Lachnospiraceae	g__unclassified_f__Lachnospiraceae	s__unclassified_f__Lachnospiraceae	OTU416	0	0	0	0	0	0	0	0	0	1	0	0
d__Bacteria	k__norank	p__Firmicutes	c__Clostridia	o__Clostridiales	f__Peptococcaceae	g__norank_f__Peptococcaceae	s__uncultured_bacterium_g__norank_f__Peptococcaceae	OTU399	0	0	0	0	0	0	0	0	0	0	0	0
d__Bacteria	k__norank	p__Firmicutes	c__Clostridia	o__Clostridiales	f__unclassified_o__Clostridiales	g__unclassified_o__Clostridiales	s__unclassified_o__Clostridiales	OTU308	0	0	0	5	2	3	0	6	0	6	4	3
d__Bacteria	k__norank	p__Firmicutes	c__Clostridia	o__Clostridiales	f__Lachnospiraceae	g__Roseburia	s__unclassified_g__Roseburia	OTU730	0	0	0	0	0	2	0	1	1	0	0	0
d__Bacteria	k__norank	p__Firmicutes	c__Bacilli	o__Lactobacillales	f__Lactobacillaceae	g__Lactobacillus	s__unclassified_g__Lactobacillus	OTU137	5	41	6	9	22	3	1	1	2	0	2	0
d__Bacteria	k__norank	p__Firmicutes	c__Clostridia	o__Clostridiales	f__Lachnospiraceae	g__unclassified_f__Lachnospiraceae	s__unclassified_f__Lachnospiraceae	OTU656	0	1	0	1	0	16	16	5	8	7	0	2
d__Bacteria	k__norank	p__Firmicutes	c__Clostridia	o__Clostridiales	f__Lachnospiraceae	g__unclassified_f__Lachnospiraceae	s__unclassified_f__Lachnospiraceae	OTU654	0	0	0	0	0	0	0	0	0	0	0	0
d__Bacteria	k__norank	p__Firmicutes	c__Clostridia	o__Clostridiales	f__Ruminococcaceae	g__Butyricicoccus	s__unclassified_g__Butyricicoccus	OTU214	0	0	2	0	0	1	6	3	0	4	0	0
d__Bacteria	k__norank	p__Firmicutes	c__Clostridia	o__Clostridiales	f__Lachnospiraceae	g__Marvinbryantia	s__unclassified_g__Marvinbryantia	OTU47	5	49	11	12	3	6	2	2	11	7	14	5
d__Bacteria	k__norank	p__Firmicutes	c__Clostridia	o__Clostridiales	f__Lachnospiraceae	g__unclassified_f__Lachnospiraceae	s__unclassified_f__Lachnospiraceae	OTU312	0	0	4	1	0	2	1	1	22	18	0	4
d__Bacteria	k__norank	p__Firmicutes	c__Clostridia	o__Clostridiales	f__Lachnospiraceae	g__Lachnospiraceae_NK4A136_group	s__uncultured_Clostridiales_bacterium_g__Lachnospiraceae_NK4A136_group	OTU649	0	0	0	0	0	2	11	2	0	0	2	3
d__Bacteria	k__norank	p__Firmicutes	c__Clostridia	o__Clostridiales	f__Ruminococcaceae	g__Ruminococcaceae_UCG-013	s__unclassified_g__Ruminococcaceae_UCG-013	OTU599	0	2	1	0	3	3	2	2	1	0	1	1
d__Bacteria	k__norank	p__Firmicutes	c__Bacilli	o__Lactobacillales	f__Streptococcaceae	g__Streptococcus	s__unclassified_g__Streptococcus	OTU320	0	0	0	0	0	0	1	0	0	0	1	0
d__Bacteria	k__norank	p__Firmicutes	c__Clostridia	o__Clostridiales	f__Ruminococcaceae	g__[Eubacterium]_coprostanoligenes_group	s__unclassified_g__[Eubacterium]_coprostanoligenes_group	OTU318	0	1	0	1	0	2	2	0	3	0	4	3
d__Bacteria	k__norank	p__Firmicutes	c__Clostridia	o__Clostridiales	f__Ruminococcaceae	g__Anaerotruncus	s__Clostridium_sp._YIT_12070	OTU418	0	0	0	2	0	3	0	0	0	0	0	0
d__Bacteria	k__norank	p__Firmicutes	c__Clostridia	o__Clostridiales	f__Ruminococcaceae	g__Ruminococcaceae_UCG-009	s__uncultured_bacterium_g__Ruminococcaceae_UCG-009	OTU492	0	0	0	0	0	2	0	0	0	1	1	0
d__Bacteria	k__norank	p__Firmicutes	c__Clostridia	o__Clostridiales	f__Ruminococcaceae	g__Ruminococcaceae_UCG-009	s__uncultured_bacterium_g__Ruminococcaceae_UCG-009	OTU142	0	0	0	0	14	126	0	0	0	0	0	0
d__Bacteria	k__norank	p__Firmicutes	c__Clostridia	o__Clostridiales	f__Ruminococcaceae	g__Anaerofilum	s__uncultured_bacterium_g__Anaerofilum	OTU584	0	0	10	0	0	4	0	4	2	7	0	1
d__Bacteria	k__norank	p__Firmicutes	c__Clostridia	o__Clostridiales	f__Lachnospiraceae	g__norank_f__Lachnospiraceae	s__Clostridium_sp._Culture-54	OTU188	0	1	4	0	0	56	20	3	12	13	0	1
d__Bacteria	k__norank	p__Firmicutes	c__Bacilli	o__Lactobacillales	f__Enterococcaceae	g__Enterococcus	s__unclassified_g__Enterococcus	OTU771	1	37	0	2	1	1	0	3	1	0	0	0
d__Bacteria	k__norank	p__Firmicutes	c__Clostridia	o__Clostridiales	f__Ruminococcaceae	g__Candidatus_Soleaferrea	s__Ruminococcaceae_bacterium_GD6	OTU489	0	1	16	0	0	2	0	1	0	1	0	1
d__Bacteria	k__norank	p__Firmicutes	c__Clostridia	o__Clostridiales	f__Lachnospiraceae	g__Lachnospiraceae_FCS020_group	s__uncultured_bacterium_g__Lachnospiraceae_FCS020_group	OTU217	0	0	4	0	1	9	10	3	7	23	0	2
d__Bacteria	k__norank	p__Actinobacteria	c__Actinobacteria	o__Propionibacteriales	f__Propionibacteriaceae	g__Propionibacterium	s__Propionibacterium_acnes_subsp._acnes_g__Propionibacterium	OTU738	0	0	0	0	0	0	0	0	0	0	0	0
d__Bacteria	k__norank	p__Firmicutes	c__Clostridia	o__Clostridiales	f__Lachnospiraceae	g__[Eubacterium]_xylanophilum_group	s__uncultured_bacterium_g__[Eubacterium]_xylanophilum_group	OTU68	3	10	282	10	17	131	242	199	138	129	6	37
d__Bacteria	k__norank	p__Actinobacteria	c__Actinobacteria	o__Coriobacteriales	f__Coriobacteriaceae	g__unclassified_f__Coriobacteriaceae	s__unclassified_f__Coriobacteriaceae	OTU331	0	7	9	5	2	1	1	1	0	0	10	0
d__Bacteria	k__norank	p__Firmicutes	c__Clostridia	o__Clostridiales	f__Lachnospiraceae	g__unclassified_f__Lachnospiraceae	s__unclassified_f__Lachnospiraceae	OTU497	0	0	0	2	0	2	1	2	2	5	1	0
d__Bacteria	k__norank	p__Firmicutes	c__Clostridia	o__Clostridiales	f__Lachnospiraceae	g__unclassified_f__Lachnospiraceae	s__unclassified_f__Lachnospiraceae	OTU550	0	0	0	0	0	5	0	3	2	3	0	0
d__Bacteria	k__norank	p__Firmicutes	c__Clostridia	o__Clostridiales	f__Ruminococcaceae	g__Ruminococcaceae_UCG-013	s__unclassified_g__Ruminococcaceae_UCG-013	OTU440	0	30	0	0	0	5	3	0	0	0	0	0
d__Bacteria	k__norank	p__Firmicutes	c__Clostridia	o__Clostridiales	f__Lachnospiraceae	g__unclassified_f__Lachnospiraceae	s__unclassified_f__Lachnospiraceae	OTU554	0	0	0	1	0	3	1	1	0	3	0	1
d__Bacteria	k__norank	p__Firmicutes	c__Bacilli	o__Lactobacillales	f__Carnobacteriaceae	g__Trichococcus	s__unclassified_g__Trichococcus	OTU774	0	0	0	1	0	0	0	0	0	0	0	0
d__Bacteria	k__norank	p__Firmicutes	c__Clostridia	o__Clostridiales	f__Lachnospiraceae	g__Blautia	s__uncultured_bacterium_g__Blautia	OTU455	0	3	0	0	0	0	0	0	3	0	1	0
d__Bacteria	k__norank	p__Proteobacteria	c__Gammaproteobacteria	o__Enterobacteriales	f__Enterobacteriaceae	g__unclassified_f__Enterobacteriaceae	s__unclassified_f__Enterobacteriaceae	OTU772	2	14	0	0	0	2	1	0	0	0	0	0
d__Bacteria	k__norank	p__Saccharibacteria	c__Unknown_Class_p__Saccharibacteria	o__Unknown_Order_c__Unknown_Class_p__Saccharibacteria	f__Unknown_Family_o__Unknown_Order_c__Unknown_Class_p__Saccharibacteria	g__Candidatus_Saccharimonas	s__uncultured_bacterium_g__Candidatus_Saccharimonas	OTU76	55	175	103	252	113	28	18	60	52	102	96	52
d__Bacteria	k__norank	p__Firmicutes	c__Clostridia	o__Clostridiales	f__Ruminococcaceae	g__Ruminiclostridium_5	s__unclassified_g__Ruminiclostridium_5	OTU478	0	0	5	0	0	11	0	3	8	13	0	1
d__Bacteria	k__norank	p__Firmicutes	c__Clostridia	o__Clostridiales	f__Lachnospiraceae	g__unclassified_f__Lachnospiraceae	s__unclassified_f__Lachnospiraceae	OTU426	0	0	0	0	0	1	0	0	1	3	0	0
d__Bacteria	k__norank	p__Firmicutes	c__Clostridia	o__Clostridiales	f__Lachnospiraceae	g__Roseburia	s__unclassified_g__Roseburia	OTU607	0	0	0	0	0	5	13	61	0	0	0	0
d__Bacteria	k__norank	p__Firmicutes	c__Clostridia	o__Clostridiales	f__Lachnospiraceae	g__norank_f__Lachnospiraceae	s__uncultured_bacterium_g__norank_f__Lachnospiraceae	OTU466	0	0	1	1	0	2	40	16	30	17	0	5
d__Bacteria	k__norank	p__Chloroflexi	c__Anaerolineae	o__Anaerolineales	f__Anaerolineaceae	g__norank_f__Anaerolineaceae	s__anaerobic_bacterium_MO-CFX2	OTU777	0	0	0	0	0	0	0	0	0	0	0	0
d__Bacteria	k__norank	p__Bacteroidetes	c__Bacteroidia	o__Bacteroidales	f__Bacteroidales_S24-7_group	g__norank_f__Bacteroidales_S24-7_group	s__unclassified_g__norank_f__Bacteroidales_S24-7_group	OTU366	1	21	167	115	5	271	738	393	315	69	5	310
d__Bacteria	k__norank	p__Firmicutes	c__Clostridia	o__Clostridiales	f__Peptostreptococcaceae	g__Romboutsia	s__unclassified_g__Romboutsia	OTU49	0	0	1	0	1	0	0	1	0	3	0	0
d__Bacteria	k__norank	p__Firmicutes	c__Bacilli	o__Lactobacillales	f__Streptococcaceae	g__Lactococcus	s__unclassified_g__Lactococcus	OTU528	9	0	1	0	0	2	0	0	0	0	0	0
d__Bacteria	k__norank	p__Firmicutes	c__Clostridia	o__Clostridiales	f__Ruminococcaceae	g__Ruminococcaceae_UCG-014	s__unclassified_g__Ruminococcaceae_UCG-014	OTU27	0	12	0	0	0	0	0	0	0	0	0	0
d__Bacteria	k__norank	p__Tenericutes	c__Mollicutes	o__Mollicutes_RF9	f__norank_o__Mollicutes_RF9	g__norank_o__Mollicutes_RF9	s__uncultured_bacterium_g__norank_o__Mollicutes_RF9	OTU636	4	0	0	0	0	0	0	1	0	0	0	0
d__Bacteria	k__norank	p__Firmicutes	c__Clostridia	o__Clostridiales	f__Ruminococcaceae	g__Ruminococcaceae_UCG-005	s__unclassified_g__Ruminococcaceae_UCG-005	OTU167	0	0	1	0	0	3	2	1	0	0	0	0
d__Bacteria	k__norank	p__Firmicutes	c__Clostridia	o__Clostridiales	f__Ruminococcaceae	g__[Eubacterium]_coprostanoligenes_group	s__gut_metagenome_g__[Eubacterium]_coprostanoligenes_group	OTU436	0	120	0	346	25	1	81	18	229	0	4	97
d__Bacteria	k__norank	p__Firmicutes	c__Bacilli	o__Bacillales	f__Staphylococcaceae	g__Staphylococcus	s__Staphylococcus_lentus_g__Staphylococcus	OTU14	0	7	0	0	1	0	0	0	0	0	0	0
d__Bacteria	k__norank	p__Firmicutes	c__Clostridia	o__Clostridiales	f__Ruminococcaceae	g__Ruminococcaceae_UCG-014	s__unclassified_g__Ruminococcaceae_UCG-014	OTU538	0	0	0	0	0	0	0	1	1	2	0	13
d__Bacteria	k__norank	p__Firmicutes	c__Clostridia	o__Clostridiales	f__Ruminococcaceae	g__unclassified_f__Ruminococcaceae	s__unclassified_f__Ruminococcaceae	OTU443	0	0	2	1	1	1	0	1	1	3	1	0
d__Bacteria	k__norank	p__Tenericutes	c__Mollicutes	o__Mollicutes_RF9	f__norank_o__Mollicutes_RF9	g__norank_o__Mollicutes_RF9	s__unclassified_g__norank_o__Mollicutes_RF9	OTU445	0	0	0	2	0	0	0	0	0	0	0	0
d__Bacteria	k__norank	p__Firmicutes	c__Clostridia	o__Clostridiales	f__Ruminococcaceae	g__Ruminiclostridium_5	s__uncultured_bacterium_g__Ruminiclostridium_5	OTU486	1	28	3	8	4	1	2	0	1	10	0	0
d__Bacteria	k__norank	p__Firmicutes	c__Clostridia	o__Clostridiales	f__Ruminococcaceae	g__Ruminiclostridium_9	s__unclassified_g__Ruminiclostridium_9	OTU256	0	3	90	11	2	234	62	105	124	154	5	27
d__Bacteria	k__norank	p__Firmicutes	c__Clostridia	o__Clostridiales	f__Family_XIII	g__[Eubacterium]_nodatum_group	s__unclassified_g__[Eubacterium]_nodatum_group	OTU587	2	1	29	5	10	27	42	26	17	16	5	11
d__Bacteria	k__norank	p__Firmicutes	c__Clostridia	o__Clostridiales	f__Christensenellaceae	g__Christensenellaceae_R-7_group	s__unclassified_g__Christensenellaceae_R-7_group	OTU541	0	0	4	0	4	4	2	1	1	0	2	0
d__Bacteria	k__norank	p__Firmicutes	c__Clostridia	o__Clostridiales	f__Ruminococcaceae	g__unclassified_f__Ruminococcaceae	s__unclassified_f__Ruminococcaceae	OTU316	0	0	3	2	0	5	0	2	0	1	0	0
d__Bacteria	k__norank	p__Firmicutes	c__Negativicutes	o__Selenomonadales	f__Veillonellaceae	g__Veillonella	s__unclassified_g__Veillonella	OTU518	0	0	0	0	0	0	0	0	0	0	0	0
d__Bacteria	k__norank	p__Bacteroidetes	c__Bacteroidia	o__Bacteroidales	f__Bacteroidales_S24-7_group	g__norank_f__Bacteroidales_S24-7_group	s__uncultured_bacterium_g__norank_f__Bacteroidales_S24-7_group	OTU480	0	0	0	0	0	0	0	0	0	0	0	0
d__Bacteria	k__norank	p__Firmicutes	c__Erysipelotrichia	o__Erysipelotrichales	f__Erysipelotrichaceae	g__Turicibacter	s__uncultured_bacterium_g__Turicibacter	OTU507	2758	292	3223	1178	2238	796	231	1196	432	776	7491	1278
d__Bacteria	k__norank	p__Bacteroidetes	c__Bacteroidia	o__Bacteroidales	f__Bacteroidales_S24-7_group	g__norank_f__Bacteroidales_S24-7_group	s__uncultured_organism_g__norank_f__Bacteroidales_S24-7_group	OTU404	0	4	0	0	0	0	0	0	0	0	0	0
d__Bacteria	k__norank	p__Firmicutes	c__Clostridia	o__Clostridiales	f__Ruminococcaceae	g__Ruminococcaceae_UCG-013	s__uncultured_bacterium_g__Ruminococcaceae_UCG-013	OTU315	0	0	0	1	1	1	1	0	0	0	2	0
d__Bacteria	k__norank	p__Firmicutes	c__Clostridia	o__Clostridiales	f__Ruminococcaceae	g__Ruminococcaceae_UCG-013	s__uncultured_bacterium_g__Ruminococcaceae_UCG-013	OTU33	12	58	63	6	34	0	3	2	4	1	39	3
d__Bacteria	k__norank	p__Proteobacteria	c__Gammaproteobacteria	o__Pseudomonadales	f__Moraxellaceae	g__Acinetobacter	s__unclassified_g__Acinetobacter	OTU764	0	0	0	0	0	0	0	0	0	0	0	0
d__Bacteria	k__norank	p__Tenericutes	c__Mollicutes	o__Mollicutes_RF9	f__norank_o__Mollicutes_RF9	g__norank_o__Mollicutes_RF9	s__uncultured_bacterium_g__norank_o__Mollicutes_RF9	OTU515	0	0	12	1	2	0	3	0	2	1	2	1
d__Bacteria	k__norank	p__Firmicutes	c__Bacilli	o__Lactobacillales	f__Lactobacillaceae	g__Lactobacillus	s__unclassified_g__Lactobacillus	OTU495	8	4	1	26	14	6	5	29	2	8	5	0
d__Bacteria	k__norank	p__Bacteroidetes	c__Bacteroidia	o__Bacteroidales	f__Bacteroidales_S24-7_group	g__norank_f__Bacteroidales_S24-7_group	s__uncultured_organism_g__norank_f__Bacteroidales_S24-7_group	OTU409	0	144	0	0	0	113	0	0	2	0	0	7
d__Bacteria	k__norank	p__Elusimicrobia	c__Elusimicrobia	o__Elusimicrobiales	f__Elusimicrobiaceae	g__Elusimicrobium	s__uncultured_bacterium_g__Elusimicrobium	OTU15	0	21	6	4	0	2	37	27	48	4	1	5
d__Bacteria	k__norank	p__Bacteroidetes	c__Bacteroidia	o__Bacteroidales	f__Prevotellaceae	g__Alloprevotella	s__uncultured_bacterium_g__Alloprevotella	OTU165	0	0	0	0	0	0	28	0	0	0	0	0
d__Bacteria	k__norank	p__unclassified_k__norank	c__unclassified_k__norank	o__unclassified_k__norank	f__unclassified_k__norank	g__unclassified_k__norank	s__unclassified_k__norank	OTU101	1	0	0	2	1	0	0	2	0	2	4	3
d__Bacteria	k__norank	p__Bacteroidetes	c__Bacteroidia	o__Bacteroidales	f__Prevotellaceae	g__Prevotellaceae_UCG-001	s__uncultured_Bacteroidales_bacterium_g__Prevotellaceae_UCG-001	OTU313	1	14	7	369	2	49	134	105	498	4	2	8
d__Bacteria	k__norank	p__Firmicutes	c__Clostridia	o__Clostridiales	f__Ruminococcaceae	g__Ruminococcaceae_UCG-010	s__unclassified_g__Ruminococcaceae_UCG-010	OTU615	0	0	1	0	0	5	11	15	11	2	1	0
d__Bacteria	k__norank	p__Firmicutes	c__Clostridia	o__Clostridiales	f__Ruminococcaceae	g__Ruminococcus_1	s__unclassified_g__Ruminococcus_1	OTU425	0	0	0	0	0	0	0	0	0	0	0	0
d__Bacteria	k__norank	p__Firmicutes	c__Clostridia	o__Clostridiales	f__Christensenellaceae	g__Christensenellaceae_R-7_group	s__uncultured_bacterium_g__Christensenellaceae_R-7_group	OTU725	0	2	4	9	8	2	2	2	3	0	3	8
d__Bacteria	k__norank	p__Firmicutes	c__Clostridia	o__Clostridiales	f__Ruminococcaceae	g__Ruminiclostridium_5	s__unclassified_g__Ruminiclostridium_5	OTU444	1	0	3	1	0	12	1	3	2	2	0	0
d__Bacteria	k__norank	p__Firmicutes	c__Clostridia	o__Clostridiales	f__Ruminococcaceae	g__Caproiciproducens	s__unclassified_g__Caproiciproducens	OTU319	0	0	0	0	0	2	0	0	0	1	0	0
d__Bacteria	k__norank	p__Tenericutes	c__Mollicutes	o__Anaeroplasmatales	f__Anaeroplasmataceae	g__Anaeroplasma	s__uncultured_bacterium_g__Anaeroplasma	OTU384	0	10	1	18	6	11	41	30	0	8	2	7
d__Bacteria	k__norank	p__Proteobacteria	c__Gammaproteobacteria	o__Xanthomonadales	f__Xanthomonadaceae	g__Stenotrophomonas	s__unclassified_g__Stenotrophomonas	OTU748	0	0	0	0	0	0	0	0	0	0	0	0
d__Bacteria	k__norank	p__Firmicutes	c__Clostridia	o__Clostridiales	f__Lachnospiraceae	g__norank_f__Lachnospiraceae	s__unclassified_g__norank_f__Lachnospiraceae	OTU603	0	1	0	1	1	14	3	2	14	19	0	0
d__Bacteria	k__norank	p__Bacteroidetes	c__Bacteroidia	o__Bacteroidales	f__Prevotellaceae	g__Prevotella_9	s__unclassified_g__Prevotella_9	OTU749	0	0	0	0	0	0	0	0	0	0	0	0
d__Bacteria	k__norank	p__Firmicutes	c__Clostridia	o__Clostridiales	f__Eubacteriaceae	g__Anaerofustis	s__unclassified_g__Anaerofustis	OTU413	0	0	2	0	0	0	0	0	0	0	0	0
d__Bacteria	k__norank	p__Bacteroidetes	c__Bacteroidia	o__Bacteroidales	f__Bacteroidales_S24-7_group	g__norank_f__Bacteroidales_S24-7_group	s__uncultured_bacterium_g__norank_f__Bacteroidales_S24-7_group	OTU11	1	36	26	39	18	161	78	57	131	59	5	65
d__Bacteria	k__norank	p__Firmicutes	c__Bacilli	o__Lactobacillales	f__Lactobacillaceae	g__Lactobacillus	s__uncultured_bacterium_g__Lactobacillus	OTU531	10	16	13	4	5	0	0	0	0	0	1	1
d__Bacteria	k__norank	p__Firmicutes	c__Clostridia	o__Clostridiales	f__Ruminococcaceae	g__[Eubacterium]_coprostanoligenes_group	s__unclassified_g__[Eubacterium]_coprostanoligenes_group	OTU127	0	0	0	0	6	0	0	0	0	0	0	0
d__Bacteria	k__norank	p__Firmicutes	c__Clostridia	o__Clostridiales	f__Lachnospiraceae	g__unclassified_f__Lachnospiraceae	s__unclassified_f__Lachnospiraceae	OTU179	0	0	0	1	0	0	7	0	112	27	0	0
d__Bacteria	k__norank	p__Firmicutes	c__Clostridia	o__Clostridiales	f__Ruminococcaceae	g__[Eubacterium]_coprostanoligenes_group	s__unclassified_g__[Eubacterium]_coprostanoligenes_group	OTU122	0	0	0	115	0	0	0	2	0	1	277	0
d__Bacteria	k__norank	p__Firmicutes	c__Clostridia	o__Clostridiales	f__Ruminococcaceae	g__unclassified_f__Ruminococcaceae	s__unclassified_f__Ruminococcaceae	OTU171	0	0	0	0	0	4	8	0	9	0	0	0
d__Bacteria	k__norank	p__Bacteroidetes	c__Bacteroidia	o__Bacteroidales	f__unclassified_o__Bacteroidales	g__unclassified_o__Bacteroidales	s__unclassified_o__Bacteroidales	OTU600	0	0	0	0	0	1	1	0	0	0	1	0
d__Bacteria	k__norank	p__Bacteroidetes	c__Bacteroidia	o__Bacteroidales	f__Bacteroidales_S24-7_group	g__norank_f__Bacteroidales_S24-7_group	s__uncultured_bacterium_g__norank_f__Bacteroidales_S24-7_group	OTU663	0	0	0	0	0	0	0	0	0	0	0	0
d__Bacteria	k__norank	p__Bacteroidetes	c__Bacteroidia	o__Bacteroidales	f__Bacteroidales_S24-7_group	g__norank_f__Bacteroidales_S24-7_group	s__uncultured_bacterium_g__norank_f__Bacteroidales_S24-7_group	OTU103	0	2	4	27	1	10	22	27	29	6	1	19
d__Bacteria	k__norank	p__Firmicutes	c__Bacilli	o__Lactobacillales	f__Lactobacillaceae	g__Lactobacillus	s__unclassified_g__Lactobacillus	OTU388	0	0	0	4	0	0	0	0	0	0	1	53
d__Bacteria	k__norank	p__Firmicutes	c__Bacilli	o__Lactobacillales	f__Streptococcaceae	g__Streptococcus	s__unclassified_g__Streptococcus	OTU547	0	48	0	8	13	2	6	7	1	1	9	0
d__Bacteria	k__norank	p__Cyanobacteria	c__Cyanobacteria	o__Gastranaerophilales	f__norank_o__Gastranaerophilales	g__norank_o__Gastranaerophilales	s__uncultured_bacterium_g__norank_o__Gastranaerophilales	OTU95	0	0	2	0	1	0	0	2	0	0	0	0
d__Bacteria	k__norank	p__Bacteroidetes	c__Bacteroidia	o__Bacteroidales	f__Porphyromonadaceae	g__Butyricimonas	s__uncultured_bacterium_g__Butyricimonas	OTU110	0	0	0	1	0	0	0	4	2	0	0	0
d__Bacteria	k__norank	p__Bacteroidetes	c__Bacteroidia	o__Bacteroidales	f__Bacteroidales_S24-7_group	g__norank_f__Bacteroidales_S24-7_group	s__uncultured_bacterium_g__norank_f__Bacteroidales_S24-7_group	OTU467	0	0	0	0	0	0	0	0	0	0	0	0
d__Bacteria	k__norank	p__Firmicutes	c__Clostridia	o__Clostridiales	f__Lachnospiraceae	g__Roseburia	s__unclassified_g__Roseburia	OTU680	0	0	1	4	0	18	0	29	27	17	1	22
d__Bacteria	k__norank	p__Firmicutes	c__Clostridia	o__Clostridiales	f__Ruminococcaceae	g__unclassified_f__Ruminococcaceae	s__unclassified_f__Ruminococcaceae	OTU170	0	0	0	0	0	0	4	6	0	0	0	0
d__Bacteria	k__norank	p__Bacteroidetes	c__Bacteroidia	o__Bacteroidales	f__Bacteroidales_S24-7_group	g__norank_f__Bacteroidales_S24-7_group	s__uncultured_bacterium_g__norank_f__Bacteroidales_S24-7_group	OTU504	0	0	0	0	0	0	0	0	0	0	0	0

## Sheet: Figure 3D
Figure 3D. KEGG functional annotation predicted from 16S rRNA sequencing.
Tax4Fun KEGG pathway	Control						TBT
Glycolysis / Gluconeogenesis	0.0151131	0.0151296	0.0112753	0.0129652	0.0156011	0.00977967	0.00990963	0.0106846	0.00929692	0.00994014	0.0115467	0.0143032
Glycerolipid metabolism	0.00975616	0.009303	0.00742487	0.0075523	0.00987934	0.00655413	0.00587052	0.00676433	0.00524372	0.0059574	0.00798961	0.00883513
Phosphotransferase system (PTS)	0.0191852	0.0167591	0.0103817	0.011572	0.0180251	0.00596248	0.00572288	0.007544	0.00419926	0.00720323	0.0120062	0.0148828
RNA transport	0.0032452	0.00312777	0.00304478	0.00291488	0.00328373	0.00265894	0.00255095	0.0025502	0.00253516	0.00277487	0.00272773	0.00290952

[truncated: 3 more sheets: Figure 4A, 4B and 4C, Figure 4D, Figure 5]
